# Supplementary material
Source: PubMed Central journal article supplement (PMC4032191)
Supplement: jp5028004_si_001.pdf [file jp5028004_si_001.pdf]

## Supporting Information

### Proton Transfer Induced SOMO-to-HOMO Level Switching in One-electron Oxidized A-T and G-C Base Pairs: A Density Functional Theory Study

Anil Kumar and M. D. Sevilla

*Department of Chemistry, Oakland University, Rochester, Michigan 48309*

#### Full reference 26.

Frisch, M. J.; Trucks, G. W.; Schlegel, H. B.; Scuseria, G. E.; Robb, M. A.; Cheeseman, J. R.; Scalmani, G.; Barone, V.; Mennucci, B.; Petersson, G. A.; Nakatsuji, H.; Caricato, M.; Li, X.; Hratchian, H. P.; Izmaylov, A. F.; Bloino, J.; Zheng, G.; Sonnenberg, J. L.; Hada, M.; Ehara, M.; Toyota, K.; Fukuda, R.; Hasegawa, J.; Ishida, M.; Nakajima, T.; Honda, Y.; Kitao, O.; Nakai, H.; Vreven, T.; Montgomery, J. A. Jr.; Peralta, J. E.; Ogliaro, F.; Bearpark, M.; Heyd, J. J.; Brothers, E.; Kudin, K. N.; Staroverov, V. N.; Kobayashi, R.; Normand, J.; Raghavachari, K.; Rendell, A.; Burant, J. C.; Iyengar, S. S.; Tomasi, J.; Cossi, M.; Rega, N.; Millam, J. M.; Klene, M.; Knox, J. E.; Cross, J. B.; Bakken, V.; Adamo, C.; Jaramillo, J.; Gomperts, R.; Stratmann, R. E.; Yazyev, O.; Austin, A. J.; Cammi, R.; Pomelli, C.; Ochterski, J. W.; Martin, R. L.; Morokuma, K.; Zakrzewski, V. G.; Voth, G. A.; Salvador, P.; Dannenberg, J. J.; Dapprich, S.; Daniels, A. D.; Farkas, O.; Foresman, J. B.; Ortiz, J. V.; Cioslowski, J.; Fox, D. J. Gaussian 09; Gaussian, Inc.: Wallingford CT, 2009.

#### Figure Captions

**Scheme 1-** Schematic diagram showing the molecular orbital configurations of (a) A-T and (b) G-C base pairs in their neutral, one- and two-electron oxidized states. PT designates the proton transfer and its location in the base pair is highlighted by solid pink circle. Location of SOMO (singly occupied molecular orbital) is highlighted by green color in the MO configuration. For closed shell systems (neutral or singlet state) HOMO distributions are shown and for open shell systems (doublet and triplet state) spin density distributions are shown. HOMO = Highest occupied molecular orbital; LUMO = lowest unoccupied molecular orbital; HDMO = highest doubly occupied molecular orbital and SOMO = singly occupied molecular orbital. Up and down arrows show  $\alpha$  and  $\beta$  spins of electrons.

**Figure S1-** Molecular orbital (MO) plots of A-T base pair in their neutral, radical cation ( $A^{\bullet+}$ -T) and proton transferred radical cation  $A(-H)^{\bullet+}$ - $T(H^+)$  states. Spin density distributions of  $A^{\bullet+}$ -T and

$A(-H)^{\bullet}-T(H^+)$  are also shown. Below each figure MO number and its energy in eV in parentheses are given. Calculations were done using the  $\omega$ b97x/6-31++G(d) method.

**Figure S2-** Molecular orbital (MO) plots of A-T base pair in their neutral, radical cation ( $A^{\bullet+}-T$ ) and proton transferred radical cation  $A(-H)^{\bullet}-T(H^+)$  states. Spin density distributions of  $A^{\bullet+}-T$  and  $A(-H)^{\bullet}-T(H^+)$  are also shown. Below each figure MO number and its energy in eV in parentheses are given. Calculations were done using the B3LYP/6-31++G(d) method.

**Figure S3-** Molecular orbital (MO) plots of A-T base pair in their neutral, radical cation ( $A^{\bullet+}-T$ ) and proton transferred radical cation  $A(-H)^{\bullet}-T(H^+)$  states. Spin density distributions of  $A^{\bullet+}-T$  and  $A(-H)^{\bullet}-T(H^+)$  are also shown. Below each figure MO number and its energy in eV in parentheses are given. Calculations were done using the M06-2x/6-31++G(d) method.

**Figure S4-** Molecular orbital (MO) plots of G-C base pair in their neutral, radical cation ( $G^{\bullet+}-C$ ) and proton transferred radical cation  $G(-H)^{\bullet}-C(H^+)$  states. Spin density distributions of  $G^{\bullet+}-C$  and  $G(-H)^{\bullet}-C(H^+)$  are also shown. Below each figure MO number and its energy in eV in parentheses are given. Calculations were done using the  $\omega$ b97x/6-31++G(d) method.

**Figure S5-** Molecular orbital (MO) plots of G-C base pair in their neutral, radical cation ( $G^{\bullet+}-C$ ) and proton transferred radical cation  $G(-H)^{\bullet}-C(H^+)$  states. Spin density distributions of  $G^{\bullet+}-C$  and  $G(-H)^{\bullet}-C(H^+)$  are also shown. Below each figure MO number and its energy in eV in parentheses are given. Calculations were done using the B3LYP/6-31++G(d) method.

**Figure S6-** Molecular orbital (MO) plots of G-C base pair in their neutral, radical cation ( $G^{\bullet+}-C$ ) and proton transferred radical cation  $G(-H)^{\bullet}-C(H^+)$  states. Spin density distributions of  $G^{\bullet+}-C$  and  $G(-H)^{\bullet}-C(H^+)$  are also shown. Below each figure MO number and its energy in eV in parentheses are given. Calculations were done using the M06-2x/6-31++G(d) method.

**Figure S7-** Calculated vertical and adiabatic ionization potentials (IP(vert) and IP(adia)) in eV of A-T base pair using  $\omega$ b97x/6-31++G(d), B3LYP/6-31++G(d) and M06-2x/6-31++G(d) methods. Relative stability between  $A^{\bullet+}-T$  and  $A(-H)^{\bullet}-T(H^+)$  are given in kcal/mol. TE = Total energy in A.U.

**Figure S8-** Calculated vertical and adiabatic ionization potentials (IP(vert) and IP(adia)) in eV of  $A^{\bullet+}-T$  in their singlet and triplet states using  $\omega$ b97x/6-31++G(d), B3LYP/6-31++G(d) and M06-2x/6-31++G(d) methods. Relative stability between singlet and triplet are given in kcal/mol. TE = Total energy in A.U.

**Figure S9-** Calculated vertical and adiabatic ionization potentials (IP(vert) and IP(adia)) in eV of adenine (A) using  $\omega$ b97x/6-31++G(d), B3LYP/6-31++G(d) and M06-2x/6-31++G(d) methods. TE = Total energy in A.U.

**Figure S10-** Calculated vertical and adiabatic ionization potentials (IP(vert) and IP(adia)) in eV of  $A(N6-H)^{\bullet}$  using  $\omega$ b97x/6-31++G(d), B3LYP/6-31++G(d) and M06-2x/6-31++G(d) methods. TE = Total energy in A.U.

**Figure S11-** Calculated vertical and adiabatic ionization potentials (IP(vert) and IP(adia)) in eV of A<sup>•+</sup> (adenine radical cation) in singlet and triplet states using ωb97x/6-31++G(d), B3LYP/6-31++G(d) and M06-2x/6-31++G(d) methods. TE = Total energy in A.U.

**Figure S12-** Calculated vertical and adiabatic ionization potentials (IP(vert) and IP(adia)) in eV of thymine (T) using ωb97x/6-31++G(d), B3LYP/6-31++G(d) and M06-2x/6-31++G(d) methods. TE = Total energy in A.U.

**Figure S13-** Calculated vertical and adiabatic ionization potentials (IP(vert) and IP(adia)) in eV of O4-protonated thymine (T(O4-H<sup>+</sup>)) using ωb97x/6-31++G(d), B3LYP/6-31++G(d) and M06-2x/6-31++G(d) methods. TE = Total energy in A.U.

**Figure S14-** Calculated vertical and adiabatic ionization potentials (IP(vert) and IP(adia)) in eV of G-C base pair using ωb97x/6-31++G(d), B3LYP/6-31++G(d) and M06-2x/6-31++G(d) methods. Relative stability between G<sup>•+</sup>-C and G(-H)<sup>•</sup>-C(H<sup>+</sup>) are given in kcal/mol. TE = Total energy in A.U.

**Figure S15-** Calculated vertical and adiabatic ionization potentials (IP(vert) and IP(adia)) in eV of G<sup>•+</sup>-C in their singlet and triplet states using ωb97x/6-31++G(d), B3LYP/6-31++G(d) and M06-2x/6-31++G(d) methods. Relative stability between singlet and triplet are given in kcal/mol. TE = Total energy in A.U.

**Figure S16-** Calculated vertical and adiabatic ionization potentials (IP(vert) and IP(adia)) in eV of guanine (G) using ωb97x/6-31++G(d), B3LYP/6-31++G(d) and M06-2x/6-31++G(d) methods. TE = Total energy in A.U.

**Figure S17-** Calculated vertical and adiabatic ionization potentials (IP(vert) and IP(adia)) in eV of G(N1-H)<sup>•</sup> using ωb97x/6-31++G(d), B3LYP/6-31++G(d) and M06-2x/6-31++G(d) methods. TE = Total energy in A.U.

**Figure S18-** Calculated vertical and adiabatic ionization potentials (IP(vert) and IP(adia)) in eV of G<sup>•+</sup> (guanine radical cation) in singlet and triplet states using ωb97x/6-31++G(d), B3LYP/6-31++G(d) and M06-2x/6-31++G(d) methods. TE = Total energy in A.U.

**Figure S19-** Calculated vertical and adiabatic ionization potentials (IP(vert) and IP(adia)) in eV of cytosine (C) using ωb97x/6-31++G(d), B3LYP/6-31++G(d) and M06-2x/6-31++G(d) methods. TE = Total energy in A.U.

**Figure S20-** Calculated vertical and adiabatic ionization potentials (IP(vert) and IP(adia)) in eV of N3-protonated cytosine (C(N3-H<sup>+</sup>)) using ωb97x/6-31++G(d), B3LYP/6-31++G(d) and M06-2x/6-31++G(d) methods. TE = Total energy in A.U.

**Figure S21-** Molecular orbital (MO) plots of G-C base pair in their neutral, radical cation (G<sup>•+</sup>-C) and proton transferred radical cation G(-H)<sup>•</sup>-C(H<sup>+</sup>) states in **solution using polarized continuum model (PCM)**. Spin density distributions of G<sup>•+</sup>-C and G(-H)<sup>•</sup>-C(H<sup>+</sup>) are also shown.

Below each figure MO number and its energy in eV in parentheses are given. Calculations were done using the  $\omega$ b97x-PCM/6-31++G(d) method.

**Figure S22-** Molecular orbital (MO) plots of A-T base pair in their neutral, radical cation ( $A^{++}$ -T) and proton transferred radical cation  $A(-H)^{\bullet}$ - $A(H^+)$  states in **solution using polarized continuum model (PCM)**. Spin density distributions of  $A^{++}$ -T and  $A(-H)^{\bullet}$ - $T(H^+)$  are also shown. Below each figure MO number and its energy in eV in parentheses are given. Calculations were done using the  $\omega$ b97x-PCM/6-31++G(d) method.

**Figure S23-** Molecular orbital (MO) plots of  $(5'-G-3')^{\bullet}$ - $(3'-C-5')$  in their neutral, radical cation  $(5'-G^{++}-3')^{\bullet}$ - $(3'-C-5')$  and proton transferred radical cation  $(5'-G(-H)^{\bullet}-3')^{\bullet}$ - $(3'-(H^+)C-5')$  states. Spin density distributions of  $(5'-G^{++}-3')^{\bullet}$ - $(3'-C-5')$  and  $(5'-G(-H)^{\bullet}-3')^{\bullet}$ - $(3'-(H^+)C-5')$  are also shown. Below each figure MO number and its energy in eV in parentheses are given. Calculations were done using the  $\omega$ b97x/6-31G(d) method to save computational time.

**Figure S24-** Calculated vertical and adiabatic ionization potentials (IP(vert) and IP(adia)) in eV of  $(5'-G-3')^{\bullet}$ - $(3'-C-5')$  using the  $\omega$ b97x/6-31G(d) method. Relative stability between  $(5'-G^{++}-3')^{\bullet}$ - $(3'-C-5')$  and proton transferred  $(5'-G(-H)^{\bullet}-3')^{\bullet}$ - $(3'-(H^+)C-5')$  in kcal/mol. TE = Total energy in A.U.

**Figure S25-** Calculated vertical and adiabatic ionization potentials (IP(vert) and IP(adia)) in eV of  $(5'-G^{++}-3')^{\bullet}$ - $(3'-C-5')$  and  $(5'-G(-H)^{\bullet}-3')^{\bullet}$ - $(3'-(H^+)C-5')$  in triplet and singlet states using the  $\omega$ b97x/6-31G(d) method. Relative stability between triplet and singlet states in kcal/mol. TE = Total energy in A.U.

**Figure S26-** Molecular orbital (MO) plots of  $(5'-A-3')^{\bullet}$ - $(3'-T-5')$  in their neutral, radical cation  $(5'-A^{++}-3')^{\bullet}$ - $(3'-T-5')$  and proton transferred radical cation  $(5'-A(-H)^{\bullet}-3')^{\bullet}$ - $(3'-(H^+)T-5')$  states. Spin density distributions of  $(5'-A^{++}-3')^{\bullet}$ - $(3'-T-5')$  and  $(5'-A(-H)^{\bullet}-3')^{\bullet}$ - $(3'-(H^+)T-5')$  are also shown. Below each figure MO number and its energy in eV in parentheses are given. Calculations were done using the  $\omega$ b97x/6-31G(d) method to save computational time.

**Figure S27-** Calculated vertical and adiabatic ionization potentials (IP(vert) and IP(adia)) in eV of  $(5'-A-3')^{\bullet}$ - $(3'-T-5')$  using the  $\omega$ b97x/6-31G(d) method. Relative stability between  $(5'-A^{++}-3')^{\bullet}$ - $(3'-T-5')$  and proton transferred  $(5'-A(-H)^{\bullet}-3')^{\bullet}$ - $(3'-(H^+)T-5')$  in kcal/mol. TE = Total energy in A.U.

**Figure S28-** Calculated vertical and adiabatic ionization potentials (IP(vert) and IP(adia)) in eV of  $(5'-A^{++}-3')^{\bullet}$ - $(3'-T-5')$  and  $(5'-A(-H)^{\bullet}-3')^{\bullet}$ - $(3'-(H^+)A-5')$  in triplet and singlet states using the  $\omega$ b97x/6-31G(d) method. Relative stability between triplet and singlet states in kcal/mol. TE = Total energy in A.U.

**Figure S29-** Molecular orbital (MO) plots of  $A^{++}$ -T and  $G^{++}$ -C base pair radical cations. Spin density distributions of  $A^{++}$ -T and  $G^{++}$ -C are also shown. Below each figure MO number and its energy in eV in parentheses are given. Calculations were done using the *ab initio* **MP2/6-31++G(D)** method using the  $\omega$ b97x/6-31++G(d) optimized geometries

**Figure S30-** Calculated hydrogen-bond lengths in Å in neutral G-C and A-T base pairs. Experimental X-ray crystallographic<sup>a,b</sup> values are given in parentheses.

**Figure S31-**  $\omega$ b97x/6-31++G(d) calculated hydrogen-bond lengths in Å in radical cation of G-C base pair. (i)  $G^{\bullet+}$ -C (top figure), (ii) PT in between G and C in  $(G^{\bullet}-C)^+$  (middle figure) and (iii) PT transferred  $G(-H)^{\bullet}-C(H^+)$ . Mulliken charges of two nitrogens are given in blue color and  $H^+$  in pink color. Pink circle shows the location of the  $H^+$  between the two bases.

**CASSCF(11,11)/def2-SV(P) and CASSCF(11,11)/6-31G\*\* calculation of one-electron oxidized A-T base pair ( $A^{\bullet+}$ -T).  $\omega$ b97x/6-31++G(d) calculated optimized geometry is used for the calculation.**

**Optimized geometries by of structures calculated by the  $\omega$ b97x/6-31++G(d) method**

---

Spin density, molecular orbitals and molecular structures were plotted using GaussView,<sup>1</sup> IQmol<sup>2</sup> and Jmol<sup>3</sup>.

1. GaussView; Gaussian, Inc.: Pittsburgh, PA, 2003.
2. Free open-source molecular editor and visualization package; available at <http://www.iqmol.org>.
3. Jmol: An open-source Java Viewer for chemical structures in 3D; Jmol Development Team, An Open-Science Project, 2004; available at <http://jmol.sourceforge.net>.

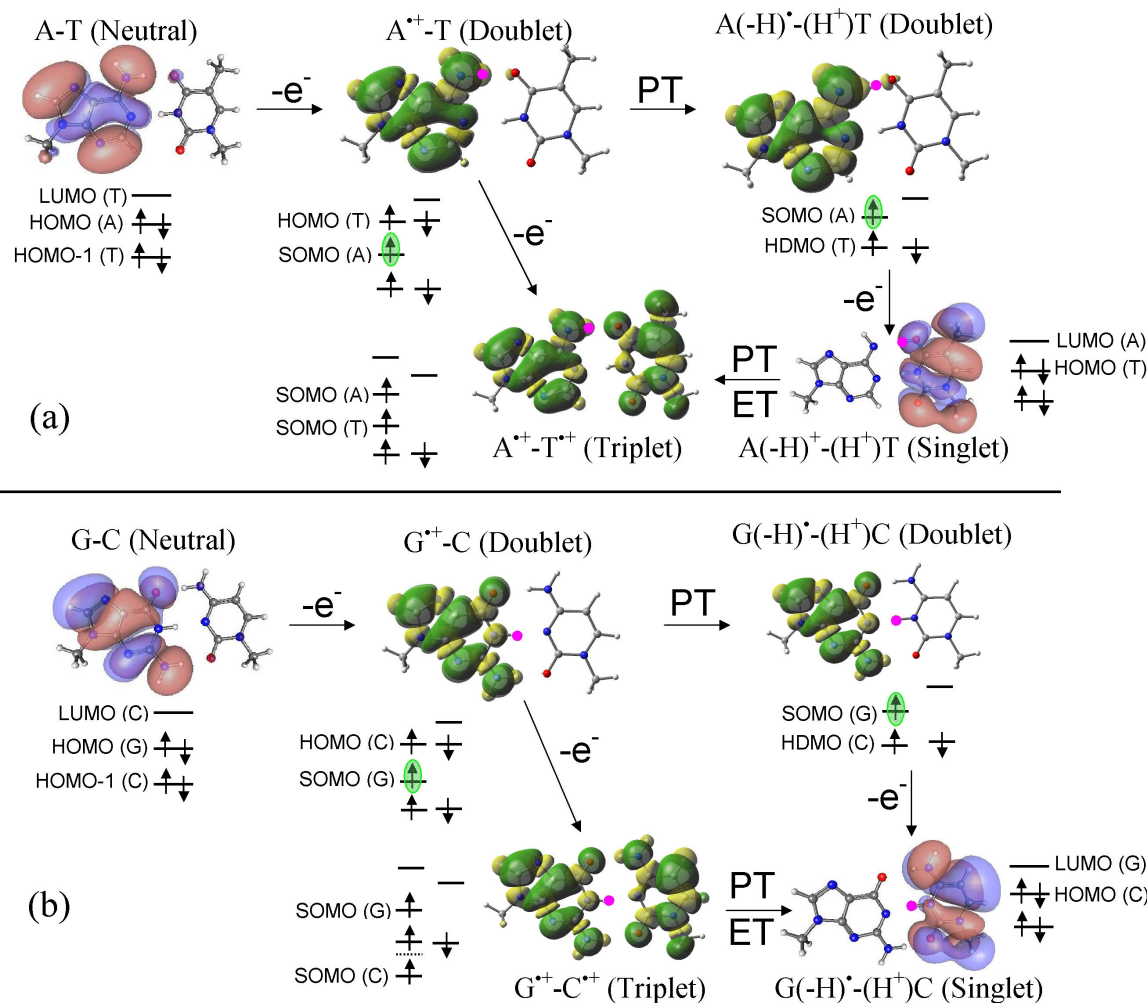

**Scheme 1-** Schematic diagram showing the molecular orbital configurations of (a) A-T and (b) G-C base pairs in their neutral, one- and two-electron oxidized states. PT designates the proton transfer and its location in the base pair is highlighted by solid pink circle. Location of SOMO (singly occupied molecular orbital) is highlighted by green color in the MO configuration. For closed shell systems (neutral or singlet state) HOMO distributions are shown and for open shell systems (doublet and triplet state) spin density distributions are shown. HOMO = Highest occupied molecular orbital; LUMO = lowest unoccupied molecular orbital; HDMO = highest doubly occupied molecular orbital and SOMO = singly occupied molecular orbital. Up and down arrows show  $\alpha$  and  $\beta$  spins of electrons. ET = electron transfer; PT = proton transfer.

A-T base pair  $\omega$ b97x /6-31++G(d)  
 $\omega$ b97x/6-31++G(d)

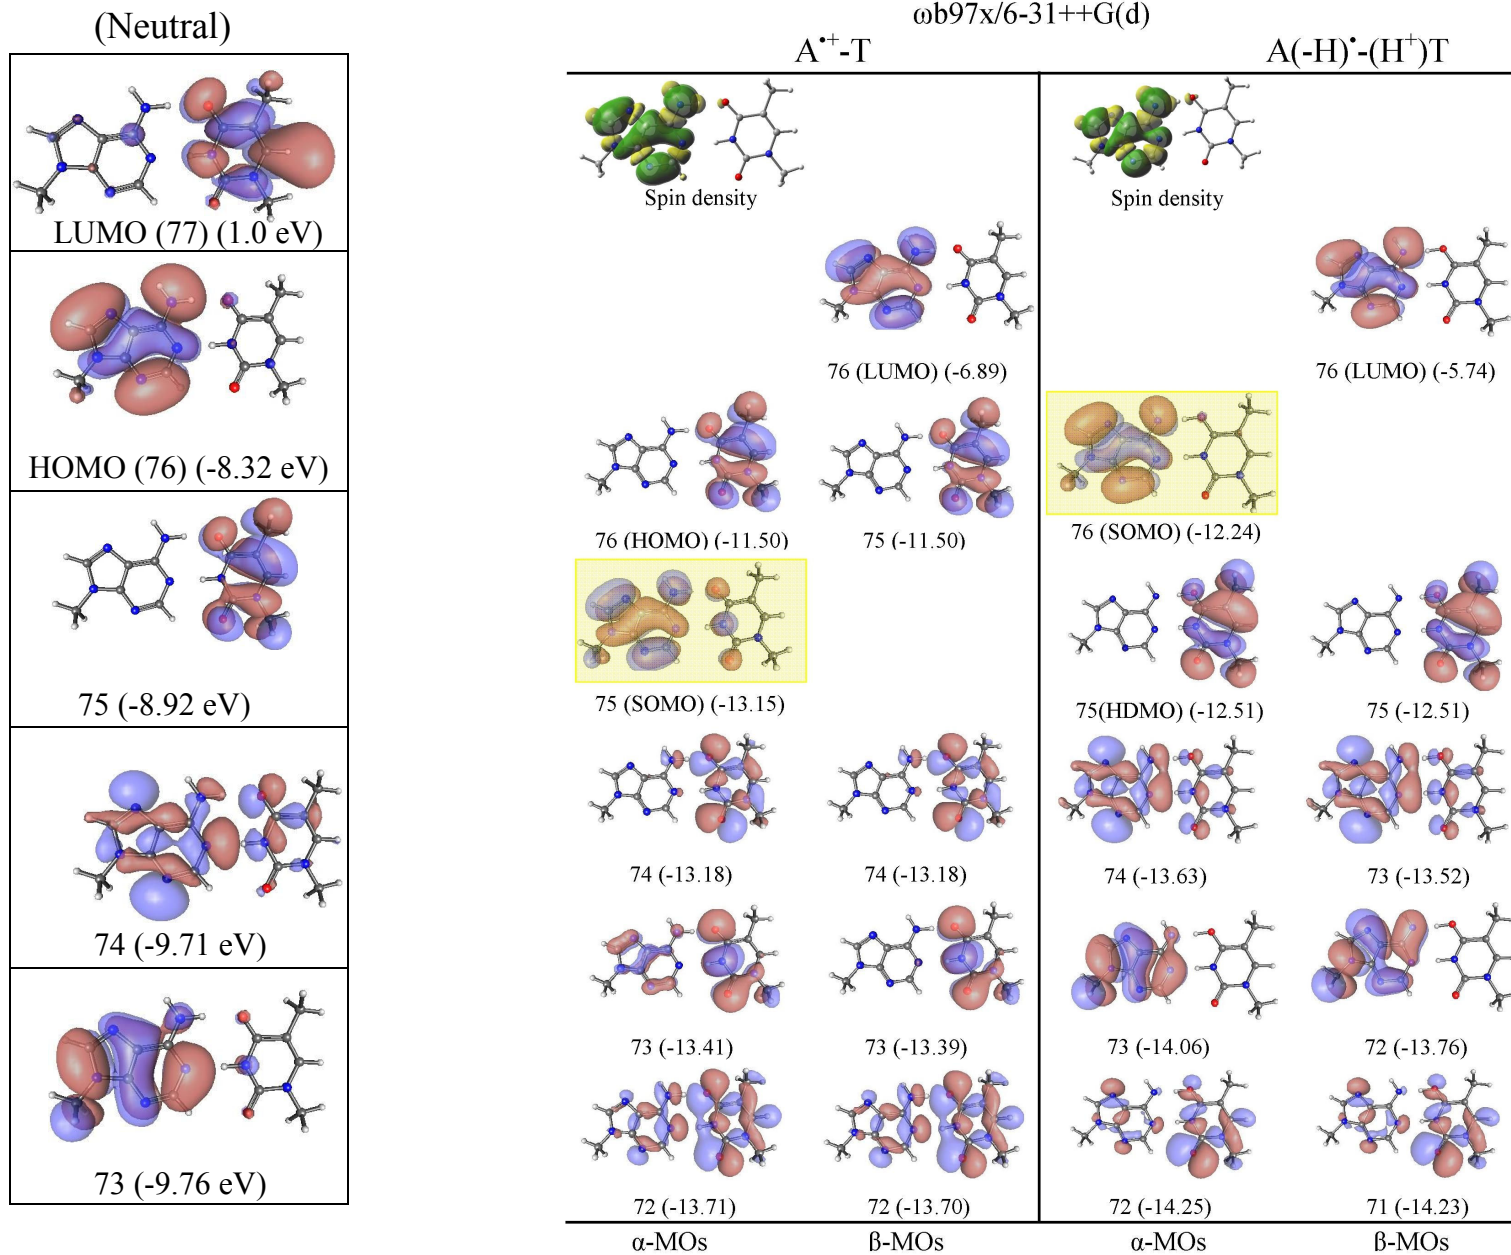

**Figure S1-** Molecular orbital (MO) plots of A-T base pair in their neutral, radical cation (A<sup>+</sup>-T) and proton transferred radical cation A(-H)<sup>•</sup>-T(H<sup>+</sup>) states. Spin density distributions of A<sup>+</sup>-T and A(-H)<sup>•</sup>-T(H<sup>+</sup>) are also shown. Below each figure MO number and its energy in eV in parentheses are given. Calculations were done using the  $\omega$ b97x/6-31++G(d) method.

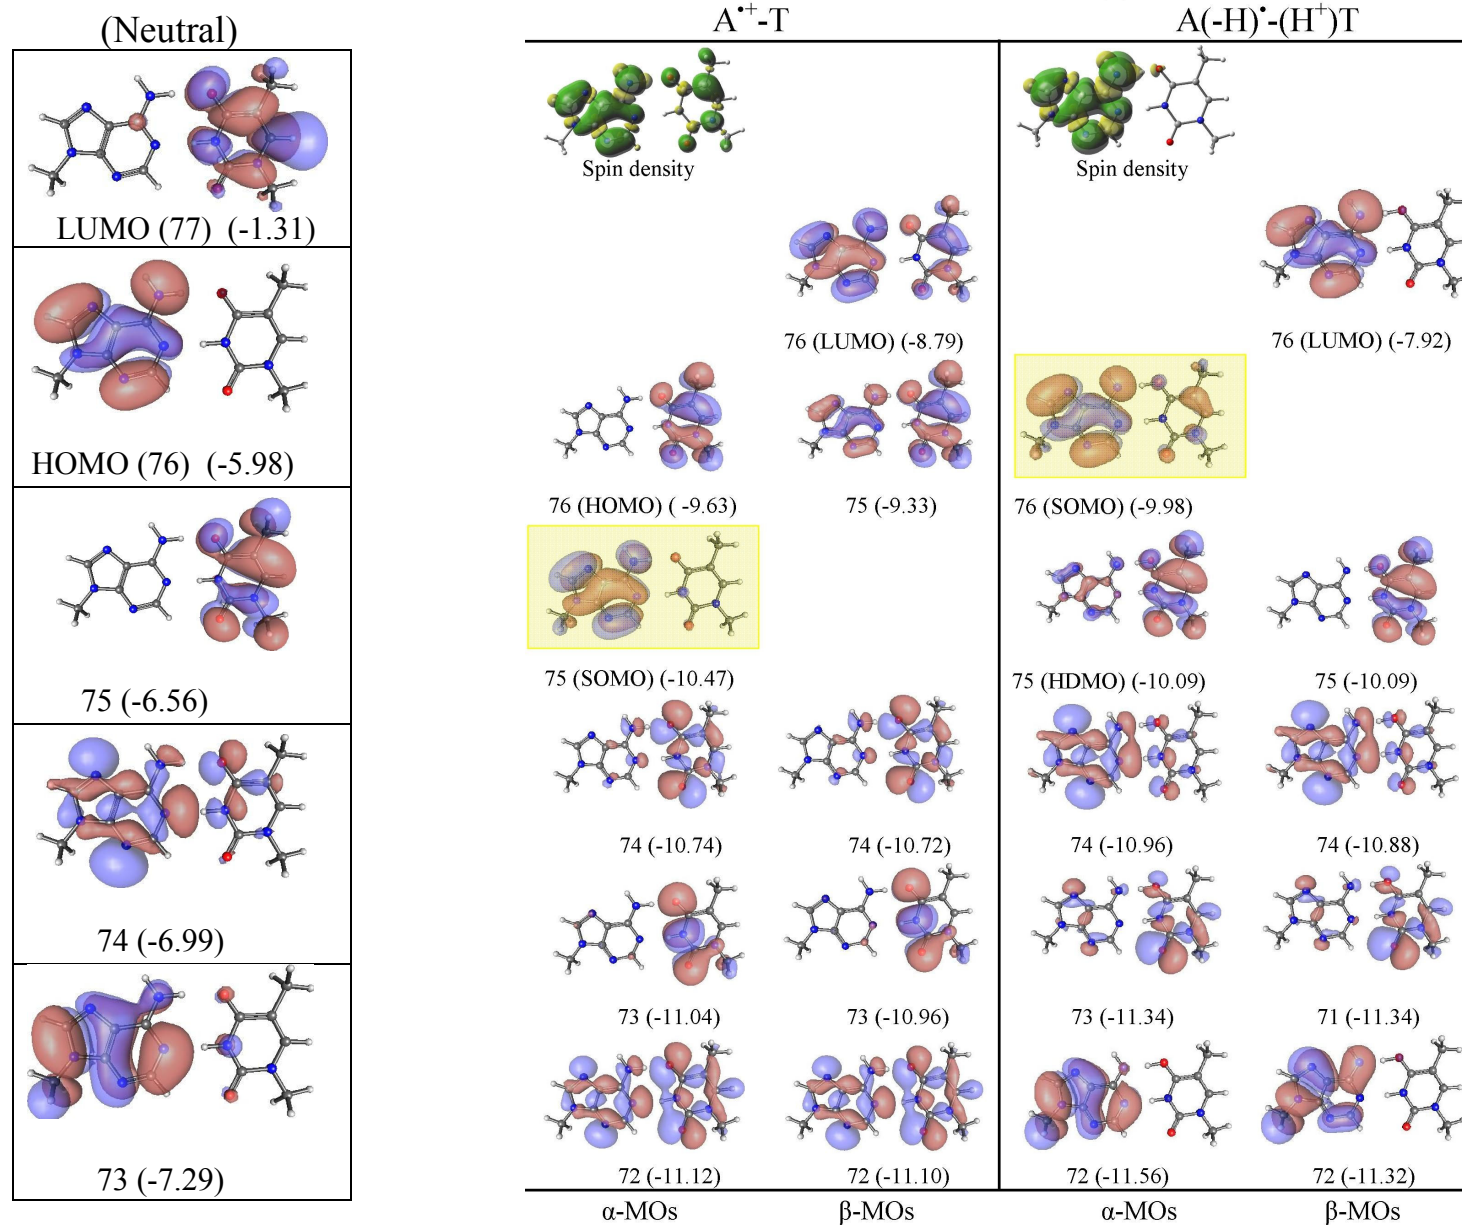

**Figure S2-** Molecular orbital (MO) plots of A-T base pair in their neutral, radical cation ( $A^{\bullet+}$ -T) and proton transferred radical cation  $A(-H)^{\bullet-}$ -T( $H^+$ ) states. Spin density distributions of  $A^{\bullet+}$ -T and  $A(-H)^{\bullet-}$ -T( $H^+$ ) are also shown. Below each figure MO number and its energy in eV in parentheses are given. Calculations were done using the B3LYP/6-31++G(d) method.



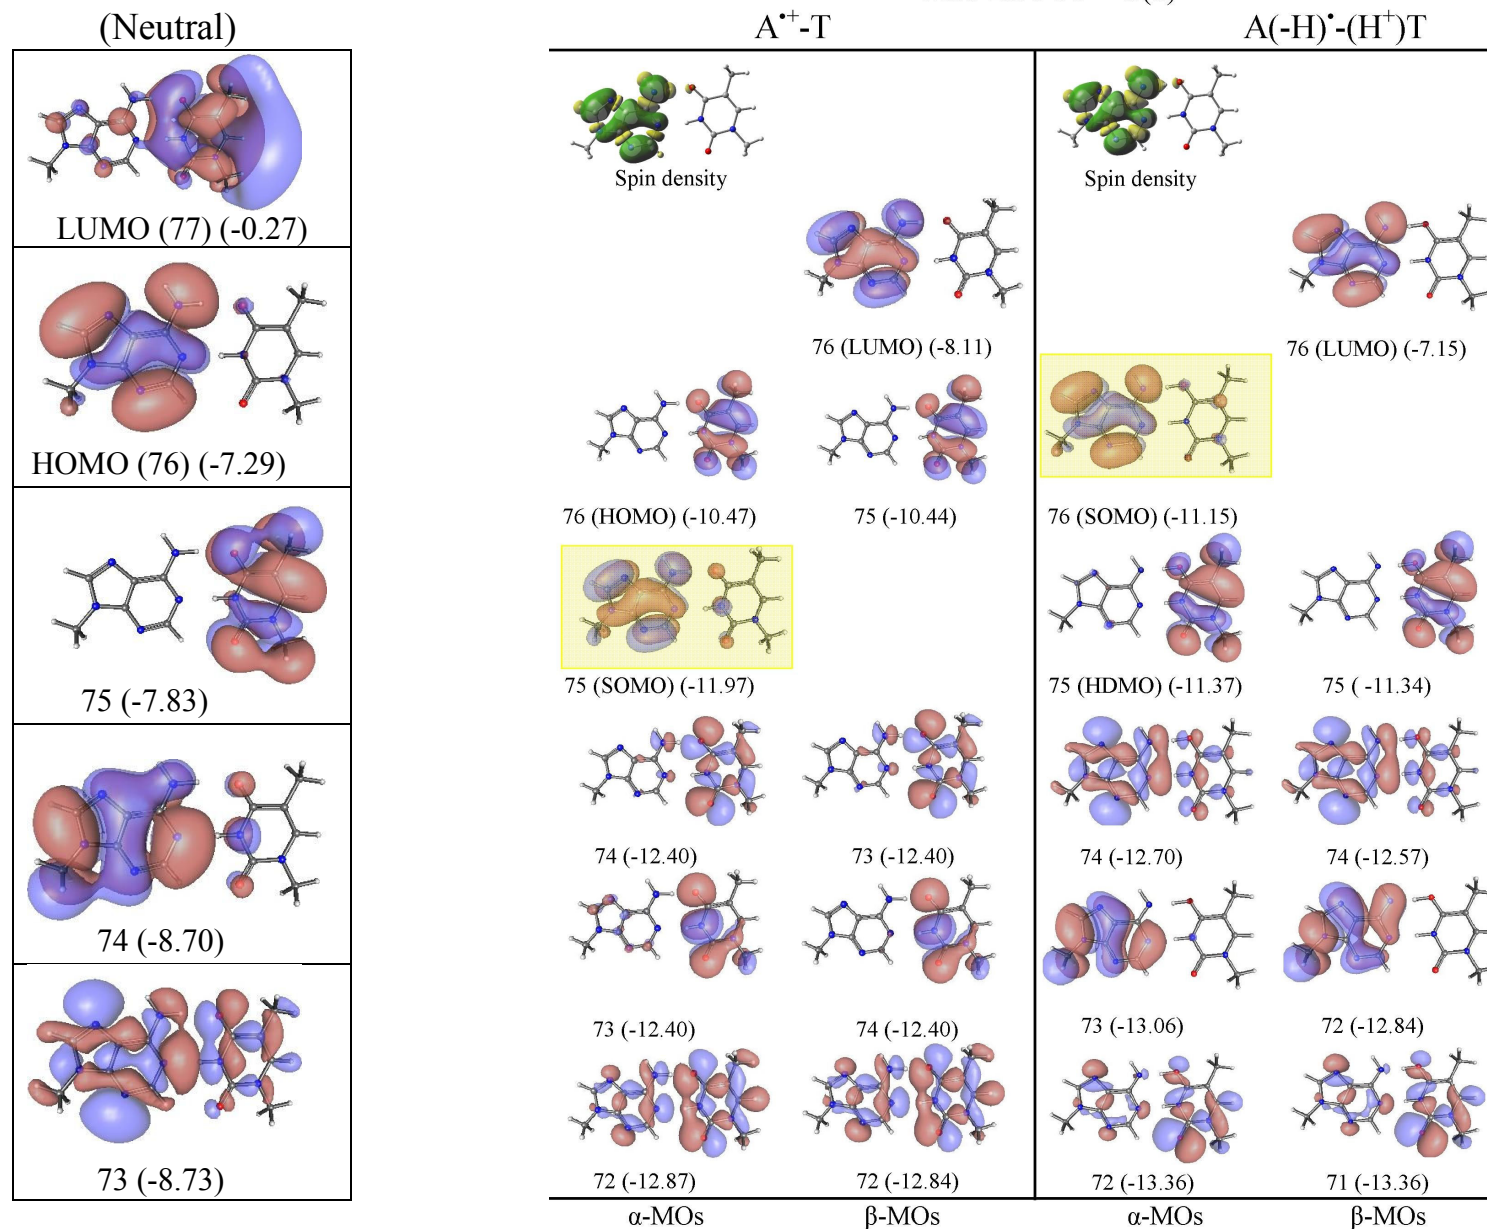

**Figure S3-** Molecular orbital (MO) plots of A-T base pair in their neutral, radical cation ( $A^{\bullet+}$ -T) and proton transferred radical cation  $A(-H)^{\bullet-}$ -T( $H^+$ ) states. Spin density distributions of  $A^{\bullet+}$ -T and  $A(-H)^{\bullet-}$ -T( $H^+$ ) are also shown. Below each figure MO number and its energy in eV in parentheses are given. Calculations were done using the M06-2x/6-31++G(d) method.

$\omega$ b97x/6-31++G(d)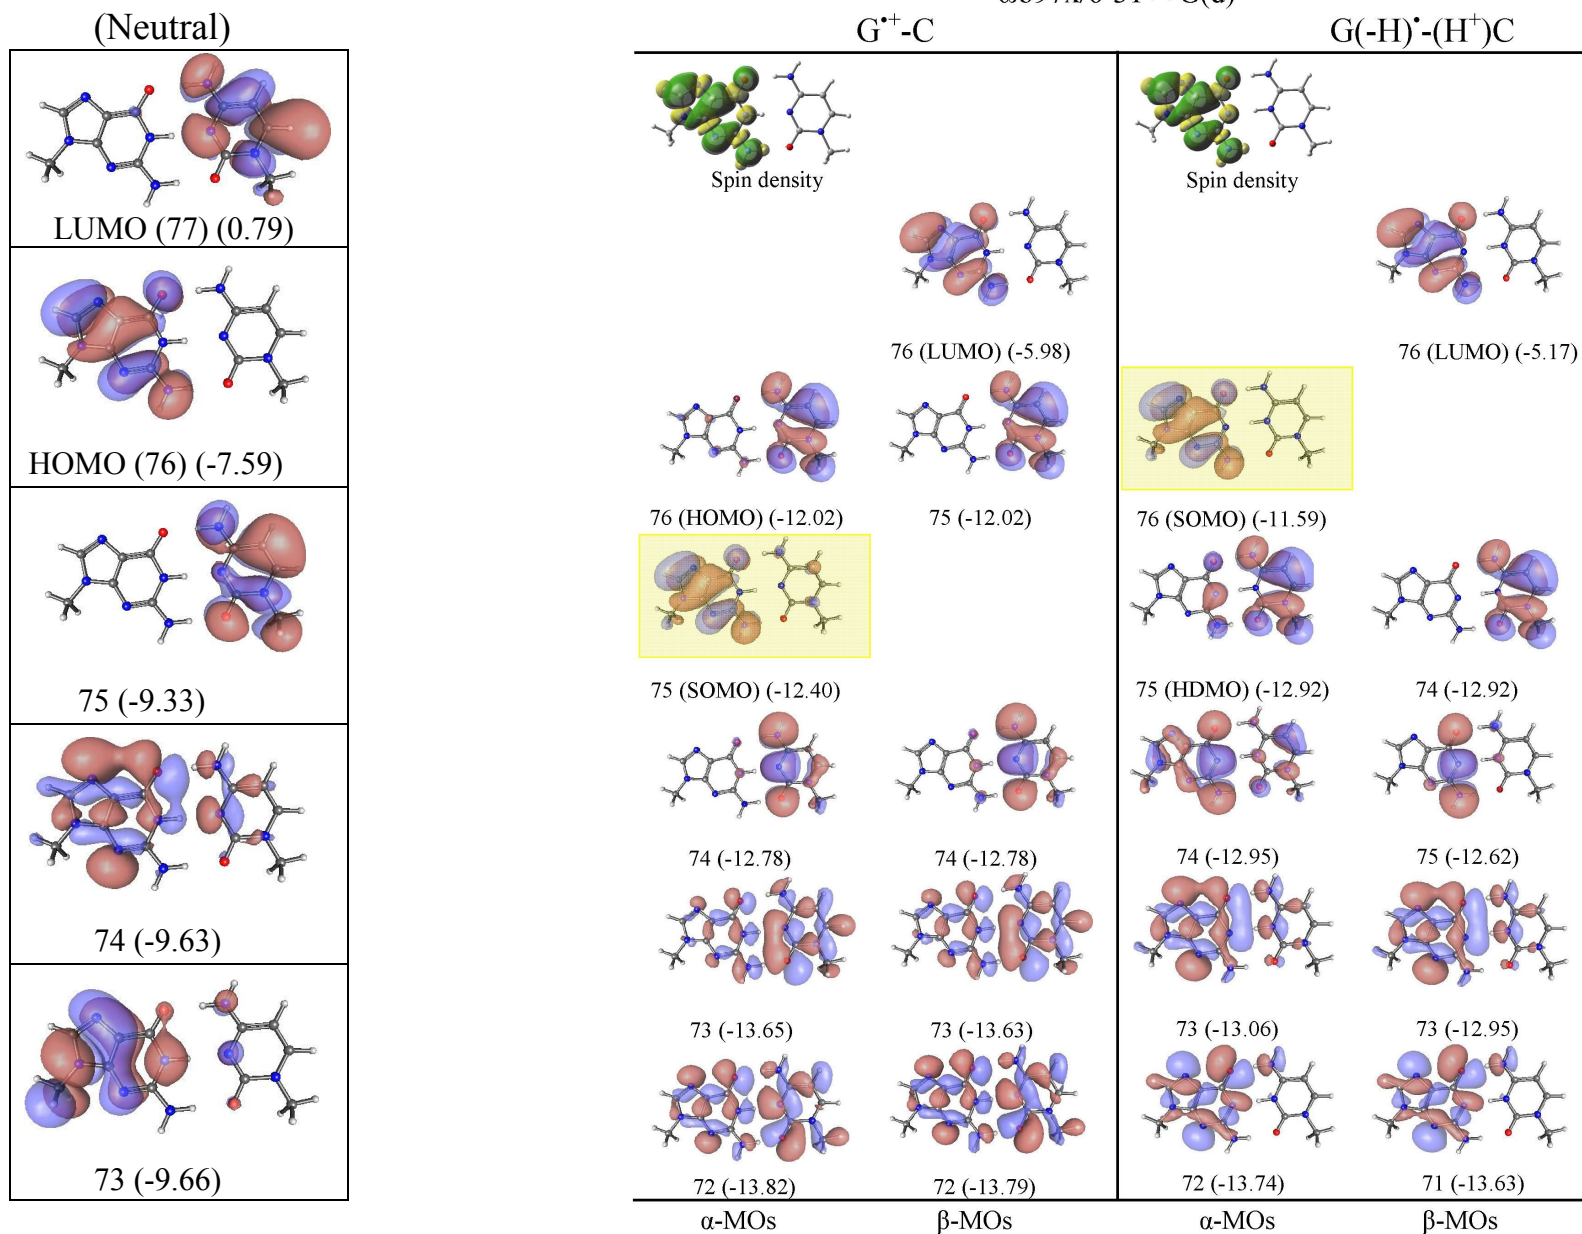

**Figure S4-** Molecular orbital (MO) plots of G-C base pair in their neutral, radical cation ( $G^{\bullet+}$ -C) and proton transferred radical cation  $G(-H)^{\bullet-}$ -C( $H^+$ ) states. Spin density distributions of  $G^{\bullet+}$ -C and  $G(-H)^{\bullet-}$ -C( $H^+$ ) are also shown. Below each figure MO number and its energy in eV in parentheses are given. Calculations were done using the  $\omega$ b97x/6-31++G(d) method.

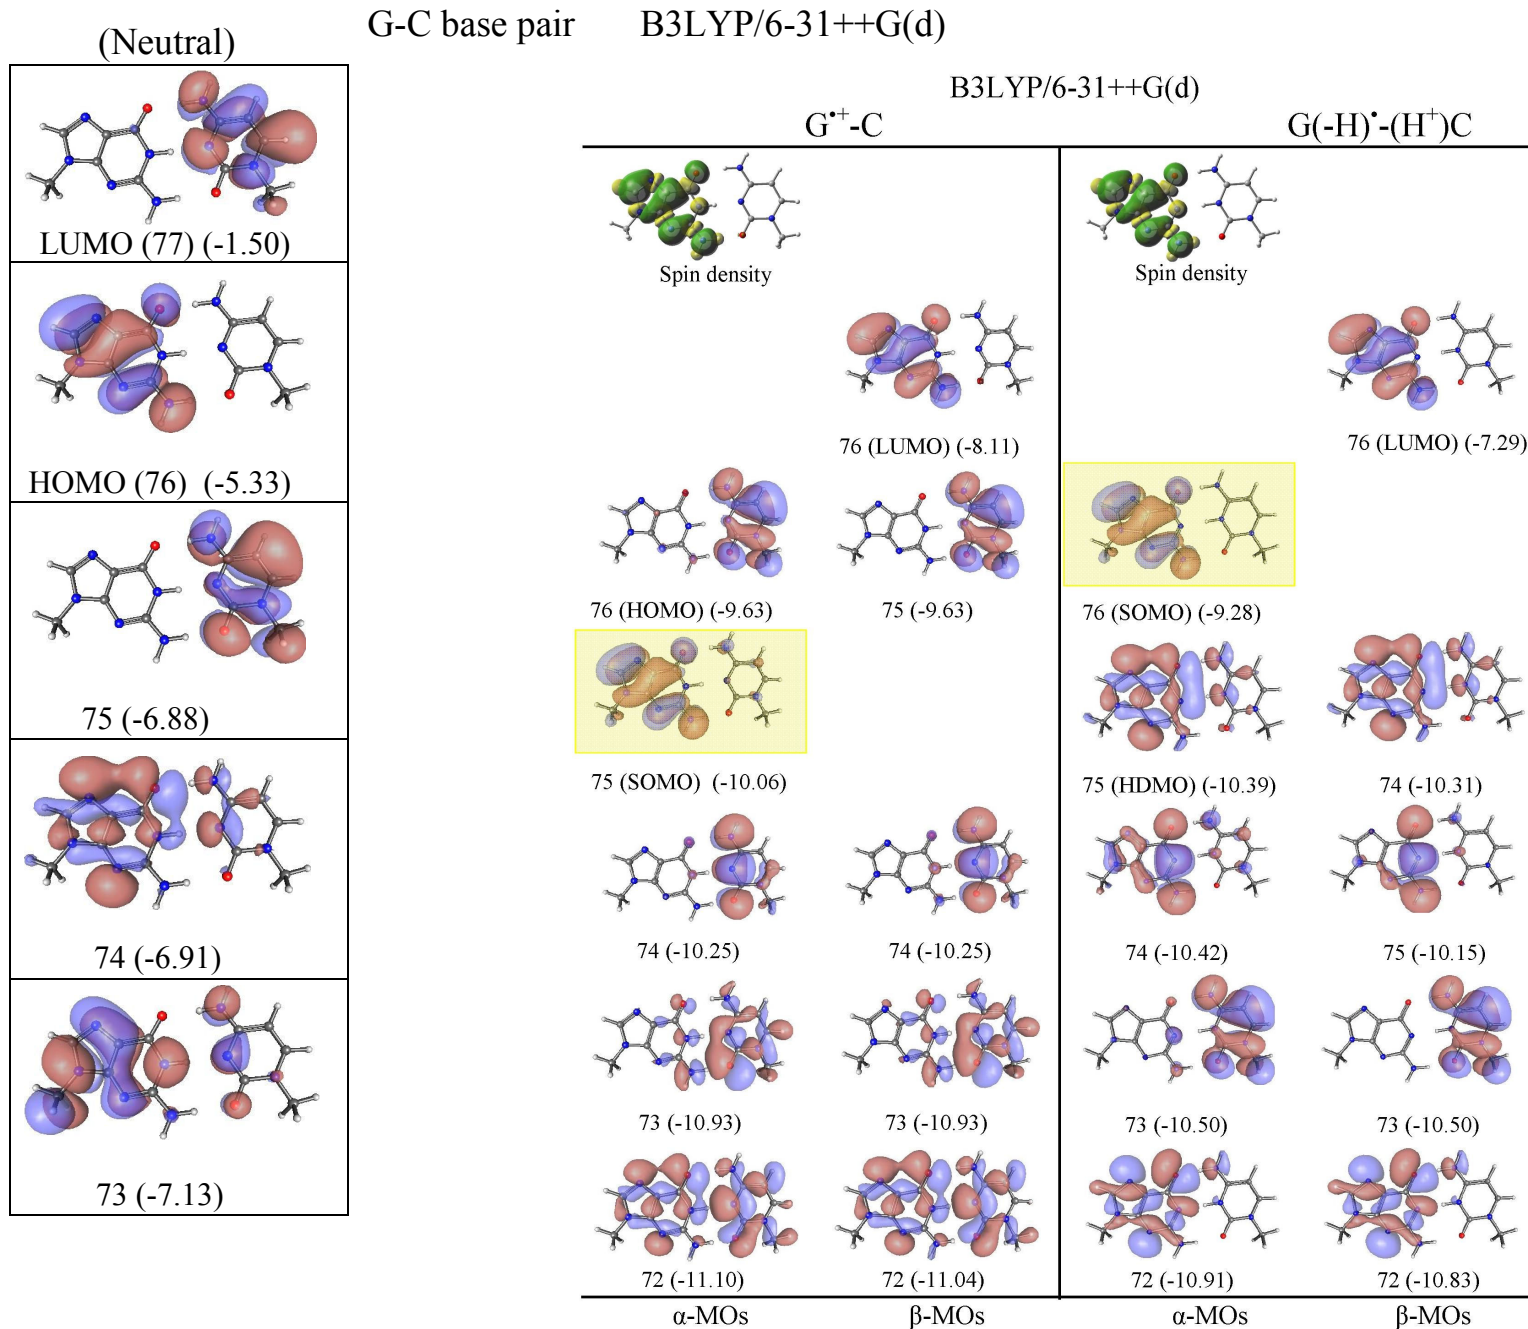

**Figure S5-** Molecular orbital (MO) plots of G-C base pair in their neutral, radical cation (G<sup>•+</sup>-C) and proton transferred radical cation G(-H)<sup>•-</sup>-C(H<sup>+</sup>) states. Spin density distributions of G<sup>•+</sup>-C and G(-H)<sup>•-</sup>-C(H<sup>+</sup>) are also shown. Below each figure MO number and its energy in eV in parentheses are given. Calculations were done using the B3LYP/6-31++G(d) method.

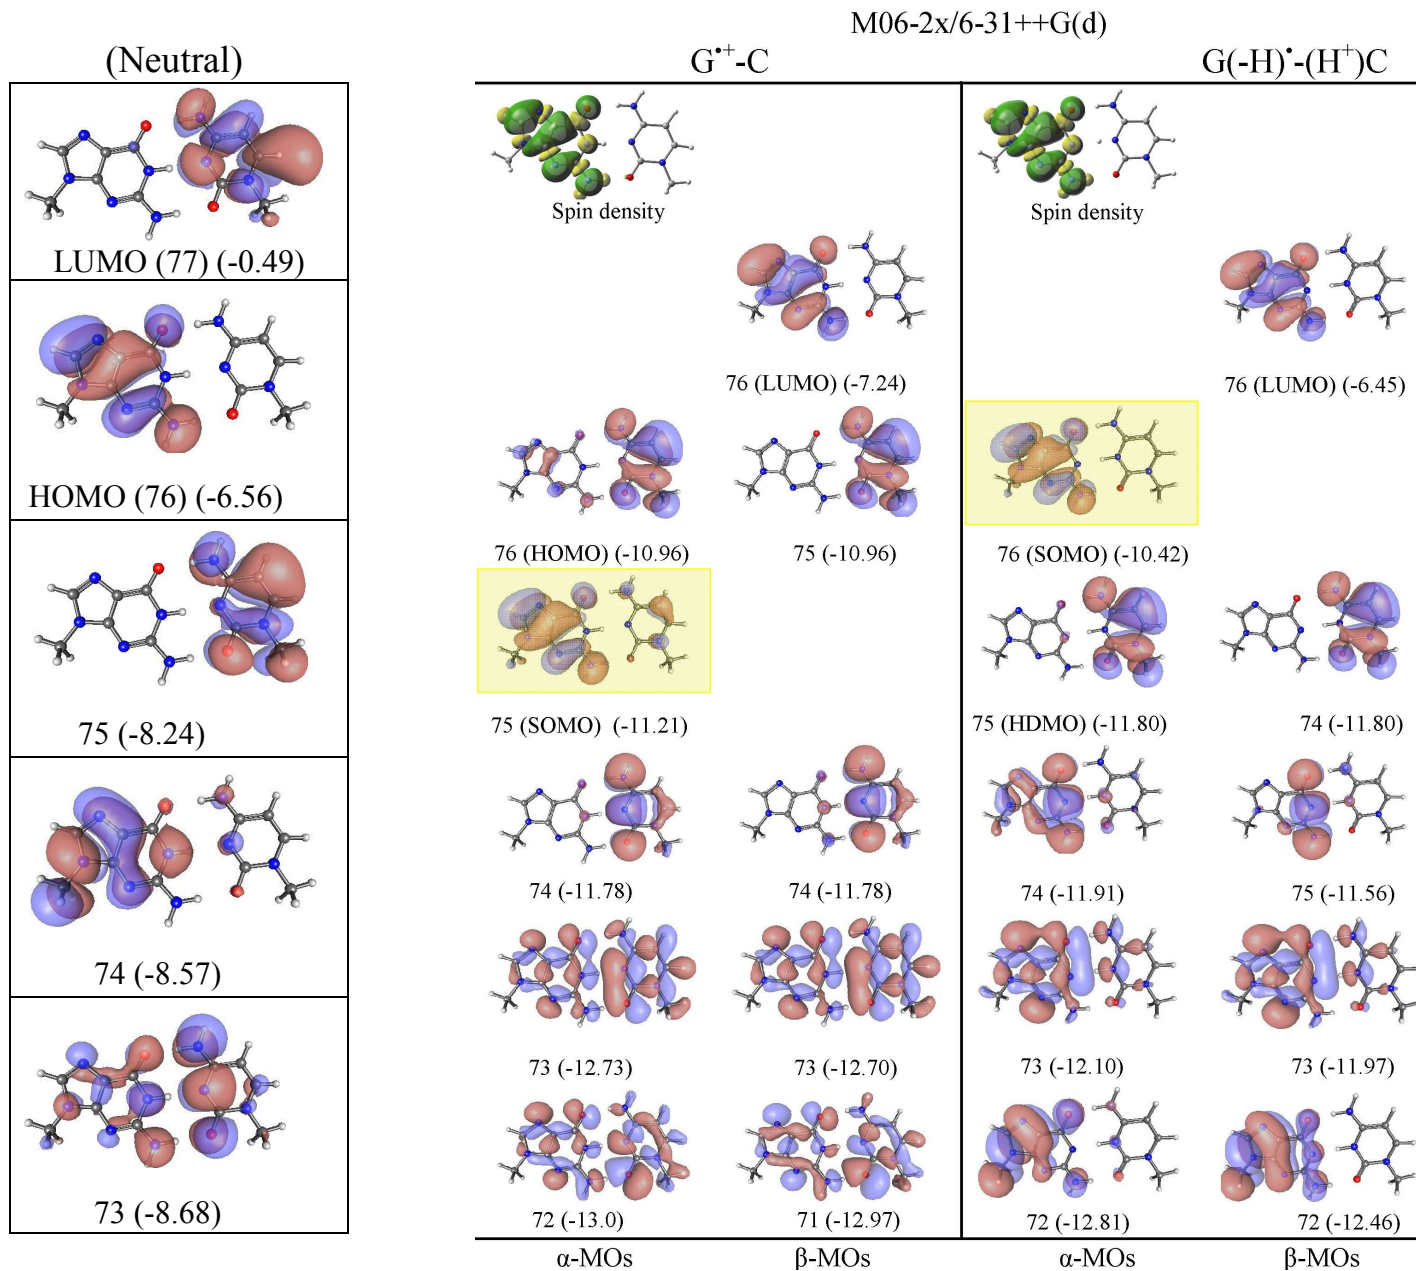

**Figure S6-** Molecular orbital (MO) plots of G-C base pair in their neutral, radical cation ( $G^{\bullet+}$ -C) and proton transferred radical cation  $G(-H)^{\bullet-}$ -C( $H^+$ ) states. Spin density distributions of  $G^{\bullet+}$ -C and  $G(-H)^{\bullet-}$ -C( $H^+$ ) are also shown. Below each figure MO number and its energy in eV in parentheses are given. Calculations were done using the M06-2x/6-31++G(d) method.

## A-T base pair

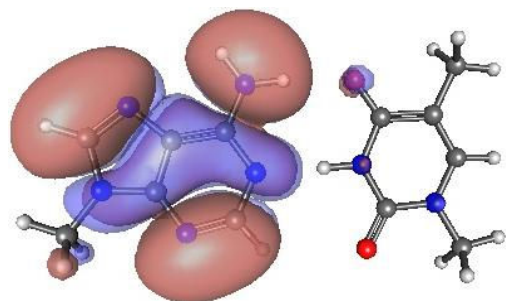

### Neutral (singlet)

MO = HOMO

TE = -999.896937614 A.U. ( $\omega$ b97x)

TE = -1000.14318621 A.U. (B3LYP)

TE = -999.731661395 A.U. (M06-2x)

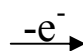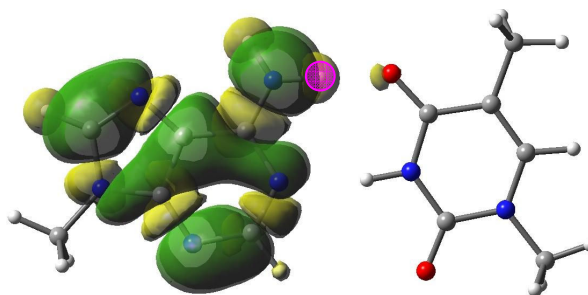

### Radical cation (A<sup>+</sup>-T)

Spin density plot

TE (vert) = -999.603318675 A.U. ( $\omega$ b97x)

TE (opt) = -999.616674723 A.U. ( $\omega$ b97x)

TE (vert) = -999.864700709 A.U. (B3LYP)

TE (opt) = -999.869874139 A.U. (B3LYP)

TE (vert) = -999.434592300 A.U. (M06-2x)

TE (opt) = -999.447980392 A.U. (M06-2x)

---

### IP = TE (A<sup>+</sup>-T) – TE (Neutral)

IP (vert) = 7.99 eV ( $\omega$ b97x)

IP (adia) = 7.62 eV ( $\omega$ b97x)

IP (vert) = 7.58 eV (B3LYP)

IP (adia) = 7.43 eV (B3LYP)

IP (vert) = 8.08 eV (M06-2x)

IP (adia) = 7.72 eV (M06-2x)

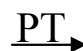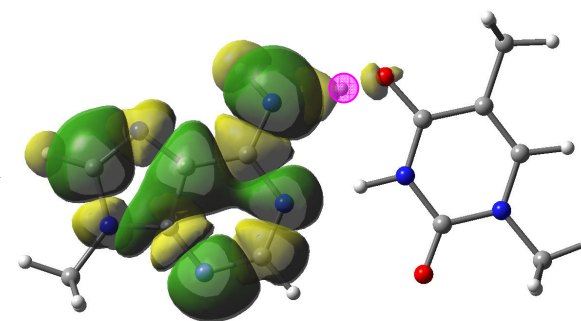

### Radical cation PT (A(N6-H)<sup>·</sup>-(O4-H<sup>+</sup>)T)

Spin density plot

TE (opt) = -999.610066607 A.U. ( $\omega$ b97x)

TE (opt) = -999.862802704 A.U. (B3LYP)

TE (opt) = -999.444830192 A.U. (M06-2x)

### Relative stability ( $\Delta E$ ) with respect to A<sup>+</sup>-T

$\Delta E = TE ((A(N6-H)^{\cdot}-)(O4-H^+)T) - TE (A^+-T)$

$\Delta E = 4.15$  kcal/mol ( $\omega$ b97x)

$\Delta E = 4.44$  kcal/mol (B3LYP)

$\Delta E = 1.98$  kcal/mol (M06-2x)

---

### IP = TE (A(N6-H)<sup>·</sup>-(N3-H<sup>+</sup>)T) – TE (Neutral)

IP (adia) = 7.80 eV ( $\omega$ b97x)

IP (adia) = 7.63 eV (B3LYP)

IP (adia) = 7.80 eV (M06-2x)

**Figure S7-** Calculated vertical and adiabatic ionization potentials (IP(vert) and IP(adia)) in eV of A-T base pair using  $\omega$ b97x/6-31++G(d), B3LYP/6-31++G(d) and M06-2x/6-31++G(d) methods. Relative stability between A<sup>+</sup>-T and A(H)<sup>·</sup>-T(H<sup>+</sup>) are given in kcal/mol. TE = Total energy in A.U.

## A<sup>+</sup>-T (radical cation)

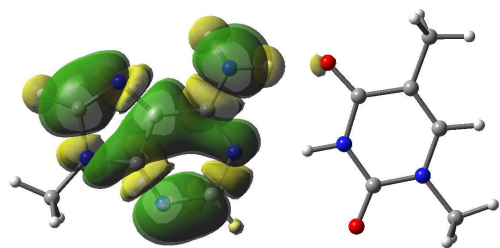

### Radical cation (A<sup>+</sup>-T) (doublet)

Spin density plot

TE = -999.616674723 A.U. ( $\omega$ b97x)

TE = -999.869874139 A.U. (B3LYP)

TE = -999.447980392 A.U. (M06-2x)

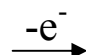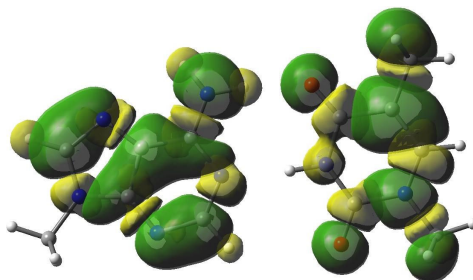

### (a) Second oxidation (A-T)<sup>+2</sup> (Triplet)

Spin density plot for triplet state

TE (vert) = -999.207996805 A.U. ( $\omega$ b97x)

TE (opt) = -999.222672458 A.U. ( $\omega$ b97x)

TE (vert) = -999.468720628 A.U. (B3LYP)

TE (opt) = -999.476799602 A.U. (B3LYP)

TE (vert) = -999.035280356 A.U. (M06-2x)

TE (opt) = -999.050530415 A.U. (M06-2x)

---


$$\text{IP} = \text{TE (A-T)}^{+2} - \text{TE (A}^{+}\text{-T)}$$

IP (vert) = 11.12 eV ( $\omega$ b97x)

IP (adia) = 10.72 eV ( $\omega$ b97x)

IP (vert) = 10.91 eV (B3LYP)

IP (adia) = 10.69 eV (B3LYP)

IP (vert) = 11.23 eV (M06-2x)

IP (adia) = 10.81 eV (M06-2x)

---

### Stability with respect to singlet state

$$\Delta E = \text{TE (Triplet)} - \text{TE (Singlet)}$$

$\Delta E = -18.11$  kcal/mol ( $\omega$ b97x)

$\Delta E = -15.40$  kcal/mol (B3LYP)

$\Delta E = -13.74$  kcal/mol (M06-2x)

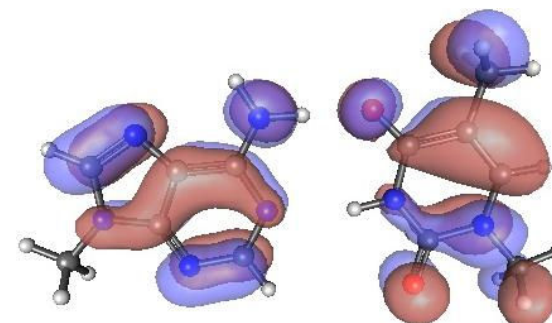

### (b) Second oxidation (A-T)<sup>+2</sup> (Singlet)

MO= HOMO plot (B3LYP calculation)

TE (vert) = -999.150894408 A.U. ( $\omega$ b97x)

<sup>a</sup>TE (opt) = -999.193808642 A.U. ( $\omega$ b97x)

TE (vert) = -999.447491210 A.U. (B3LYP)

<sup>b</sup>TE (opt) = -999.452266069 A.U. (B3LYP)

TE (vert) = -998.998413811 A.U. (M06-2x)

<sup>a</sup>TE (opt) = -999.028623036 A.U. (M06-2x)

---


$$\text{IP} = \text{TE (A-T)}^{+2} - \text{TE (A}^{+}\text{-T)}$$

IP (vert) = 12.67 eV ( $\omega$ b97x)

IP (adia) = 11.50 eV ( $\omega$ b97x)

IP (vert) = 11.49 eV (B3LYP)

IP (adia) = 11.36 eV (B3LYP)

IP (vert) = 12.23 eV (M06-2x)

IP (adia) = 11.41 eV (M06-2x)

---

<sup>a</sup>N6 proton of A transfers to O4 of T.

<sup>b</sup>No proton transfer.

**Figure S8-** Calculated vertical and adiabatic ionization potentials (IP(vert) and IP(adia)) in eV of A<sup>+</sup>-T in their singlet and triplet states using  $\omega$ b97x/6-31++G(d), B3LYP/6-31++G(d) and M06-2x/6-31++G(d) methods. Relative stability between singlet and triplet are given in kcal/mol. TE = Total energy in A.U.

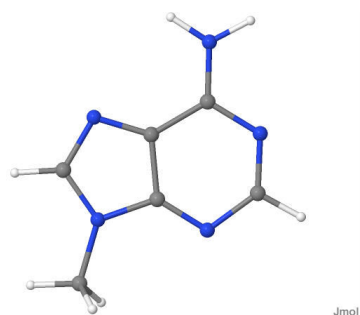

**Neutral (singlet)**

TE = -506.526211220 A.U. ( $\omega$ b97x)  
 TE = -506.653966407 A.U. (B3LYP)  
 TE = -506.448696166 A.U. (M06-2x)

**Adenine (A)**

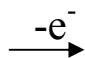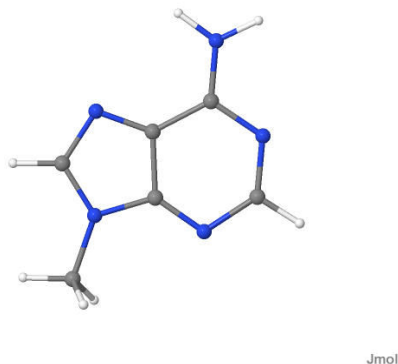

**Radical cation (A<sup>+</sup>)**

TE (vert) = -506.222231158 A.U. ( $\omega$ b97x)  
 TE (opt) = -506.232589378 A.U. ( $\omega$ b97x)  
 TE (vert) = -506.356979434 A.U. (B3LYP)  
 TE (opt) = -506.364503844 A.U. (B3LYP)  
 TE (vert) = -506.142046712 A.U. (M06-2x)  
 TE (opt) = -506.151931945 A.U. (M06-2x)

-----  
**IP = TE (A<sup>+</sup>) - TE (Neutral)**

IP (vert) = 8.27 eV ( $\omega$ b97x)  
 IP (adia) = 7.99 eV ( $\omega$ b97x)  
 IP (vert) = 8.08 eV (B3LYP)  
 IP (adia) = 7.87 eV (B3LYP)  
 IP (vert) = 8.34 eV (M06-2x)  
 IP (adia) = 8.07 eV (M06-2x)

**Figure S9-** Calculated vertical and adiabatic ionization potentials (IP(vert) and IP(adia)) in eV of adenine (A) using  $\omega$ b97x/6-31++G(d), B3LYP/6-31++G(d) and M06-2x/6-31++G(d) methods. TE = Total energy in A.U.

### Adenine(N6-H)<sup>•</sup> (A(N6-H)<sup>•</sup>)

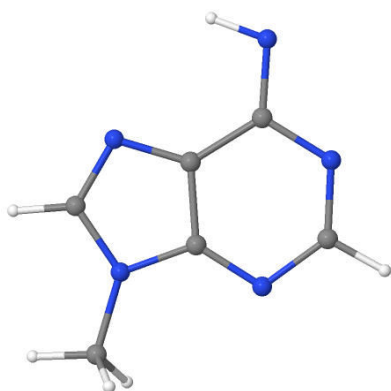

Jmol

#### A(N6-H)<sup>•</sup> (radical) (doublet)

TE = -505.852465614 A.U. ( $\omega$ b97x)

TE = -505.984536915 A.U. (B3LYP)

TE = -505.775031411 A.U. (M06-2x)

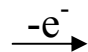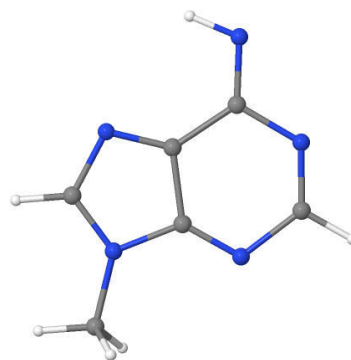

Jmol

#### A(N6-H)<sup>+</sup> (cation)

TE (vert) = -505.528478118 A.U. ( $\omega$ b97x)

TE (opt) = -505.544056952 A.U. ( $\omega$ b97x)

TE (vert) = -505.670410554 A.U. (B3LYP)

TE (opt) = -505.680585365 A.U. (B3LYP)

TE (vert) = -505.454274067 A.U. (M06-2x)

TE (opt) = -505.469014238 A.U. (M06-2x)

-----  
**IP = TE (A(N6-H)<sup>+</sup>) - TE (A(N6-H)<sup>•</sup>)**

IP (vert) = 8.81 eV ( $\omega$ b97x)

IP (adia) = 8.39 eV ( $\omega$ b97x)

IP (vert) = 8.54 eV (B3LYP)

IP (adia) = 8.27 eV (B3LYP)

IP (vert) = 8.73 eV (M06-2x)

IP (adia) = 8.32 eV (M06-2x)

**Figure S10-** Calculated vertical and adiabatic ionization potentials (IP(vert) and IP(adia)) in eV of A(N6-H)<sup>•</sup> using  $\omega$ b97x/6-31++G(d), B3LYP/6-31++G(d) and M06-2x/6-31++G(d) methods. TE = Total energy in A.U.



## Adenine radical cation ( $A^{\bullet+}$ )

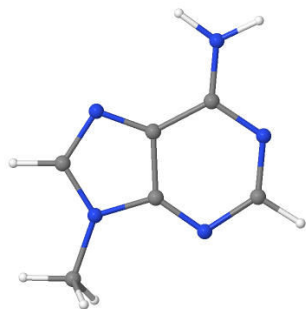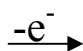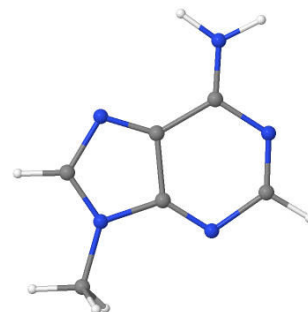

### $A^{\bullet+}$ (radical cation) (doublet)

TE = -506.232589378 A.U. ( $\omega$ b97x)  
 TE = -506.364503844 A.U. (B3LYP)  
 TE = -506.151931945 A.U. (M06-2x)

### Second oxidation ( $A^{+2}$ ) (Singlet)

TE (vert) = -505.735968816 A.U. ( $\omega$ b97x)  
 TE (opt) = -505.751806372 A.U. ( $\omega$ b97x)  
 TE (vert) = -505.872314028 A.U. (B3LYP)  
 TE (opt) = -505.884286777 A.U. (B3LYP)  
 TE (vert) = -505.655548234 A.U. (M06-2x)  
 TE (opt) = -505.670477372 A.U. (M06-2x)

---

#### IP = TE ( $A^{+2}$ ) – TE ( $A^{\bullet+}$ )

IP (vert) = 13.51 eV ( $\omega$ b97x)  
 IP (adia) = 13.08 eV ( $\omega$ b97x)  
 IP (vert) = 13.39 eV (B3LYP)  
 IP (adia) = 13.06 eV (B3LYP)  
 IP (vert) = 13.50 eV (M06-2x)  
 IP (adia) = 13.10 eV (M06-2x)

---

#### Stability with respect to triplet state

$\Delta E$  = TE (Singlet) – TE (Triplet)  
 $\Delta E$  = -23.41 kcal/mol ( $\omega$ b97x)  
 $\Delta E$  = -14.57 kcal/mol (B3LYP)  
 $\Delta E$  = -24.00 kcal/mol (M06-2x)

### Second oxidation ( $A^{+2}$ ) (Triplet)

TE (vert) = -505.697741138 A.U. ( $\omega$ b97x)  
 TE (opt) = -505.714495298 A.U. ( $\omega$ b97x)  
 TE (vert) = -505.847570408 A.U. (B3LYP)  
 TE (opt) = -505.861069514 A.U. (B3LYP)  
 TE (vert) = -505.616142722 A.U. (M06-2x)  
 TE (opt) = -505.632224684 A.U. (M06-2x)

---

#### IP = TE ( $A^{+2}$ ) – TE ( $A^{\bullet+}$ )

IP (vert) = 14.55 eV ( $\omega$ b97x)  
 IP (adia) = 14.09 eV ( $\omega$ b97x)  
 IP (vert) = 14.06 eV (B3LYP)  
 IP (adia) = 13.69 eV (B3LYP)  
 IP (vert) = 14.57 eV (M06-2x)  
 IP (adia) = 14.14 eV (M06-2x)

**Figure S11-** Calculated vertical and adiabatic ionization potentials (IP(vert) and IP(adia)) in eV of  $A^{\bullet+}$  (adenine radical cation) in singlet and triplet states using  $\omega$ b97x/6-31++G(d), B3LYP/6-31++G(d) and M06-2x/6-31++G(d) methods. TE = Total energy in A.U.

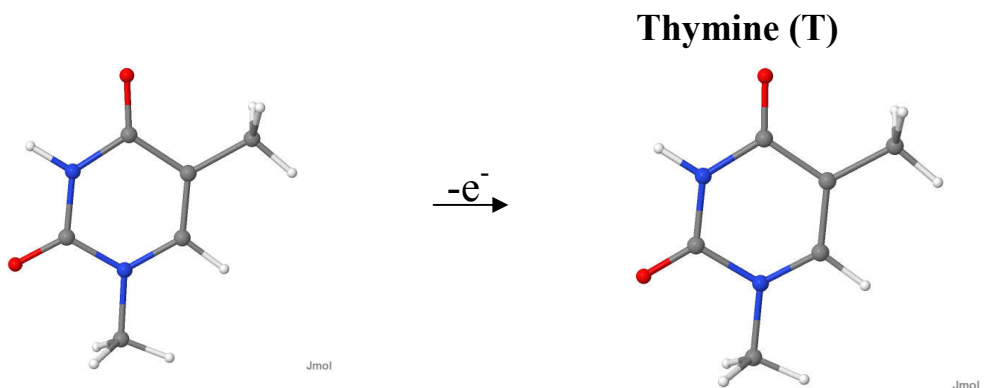

**Thymine Neutral (singlet)**

TE = -493.346405283 A.U. ( $\omega$ b97x)  
 TE = -493.469141148 A.U. (B3LYP)  
 TE = -493.259222838 A.U. (M06-2x)

**Radical cation ( $T^{\bullet+}$ )**

TE (vert) = -493.022638292 A.U. ( $\omega$ b97x)  
 TE (opt) = -493.033132165 A.U. ( $\omega$ b97x)  
 TE (vert) = -493.151107842 A.U. (B3LYP)  
 TE (opt) = -493.158790904 A.U. (B3LYP)  
 TE (vert) = -492.932799589 A.U. (M06-2x)  
 TE (opt) = -492.942726101 A.U. (M06-2x)

-----  
**IP = TE ( $T^{\bullet+}$ ) – TE (Neutral)**

IP (vert) = 8.81 eV ( $\omega$ b97x)  
 IP (adia) = 8.52 eV ( $\omega$ b97x)  
 IP (vert) = 8.65 eV (B3LYP)  
 IP (adia) = 8.44 eV (B3LYP)  
 IP (vert) = 8.88 eV (M06-2x)  
 IP (adia) = 8.61 eV (M06-2x)

**Figure S12-** Calculated vertical and adiabatic ionization potentials (IP(vert) and IP(adia)) in eV of thymine (T) using  $\omega$ b97x/6-31++G(d), B3LYP/6-31++G(d) and M06-2x/6-31++G(d) methods. TE = Total energy in A.U.

## O4-protonated Thymine (T(O4-H<sup>+</sup>))

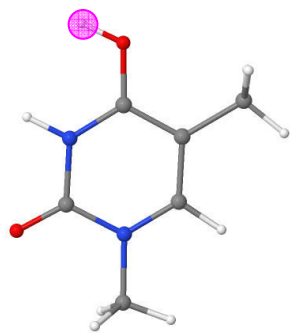

Jmol

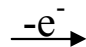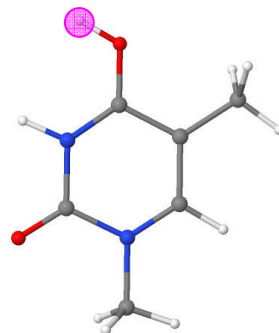

Jmol

### T(O4-H<sup>+</sup>) (Neutral) (singlet)

TE = -493.682671986 A.U. ( $\omega$ b97x)  
TE = -493.806785396 A.U. (B3LYP)  
TE = -493.594239002 A.U. (M06-2x)

### Radical cation (T(O4-H<sup>+</sup>))<sup>+</sup>

TE (vert) = -493.181791526 A.U. ( $\omega$ b97x)  
TE (opt) = -493.191529860 A.U. ( $\omega$ b97x)  
TE (vert) = -493.311178335 A.U. (B3LYP)  
TE (opt) = -493.318507459 A.U. (B3LYP)  
TE (vert) = -493.090241000 A.U. (M06-2x)  
TE (opt) = -493.099572174 A.U. (M06-2x)

-----  
**IP = TE (T<sup>+</sup>) - TE (Neutral)**

IP (vert) = 13.62 eV ( $\omega$ b97x)  
IP (adia) = 13.36 eV ( $\omega$ b97x)  
IP (vert) = 13.48 eV (B3LYP)  
IP (adia) = 13.28 eV (B3LYP)  
IP (vert) = 13.71 eV (M06-2x)  
IP (adia) = 13.46 eV (M06-2x)

**Figure S13-** Calculated vertical and adiabatic ionization potentials (IP(vert) and IP(adia)) in eV of O4-protonated thymine (T(O4-H<sup>+</sup>)) using  $\omega$ b97x/6-31++G(d), B3LYP/6-31++G(d) and M06-2x/6-31++G(d) methods. TE = Total energy in A.U.

## G-C base pair

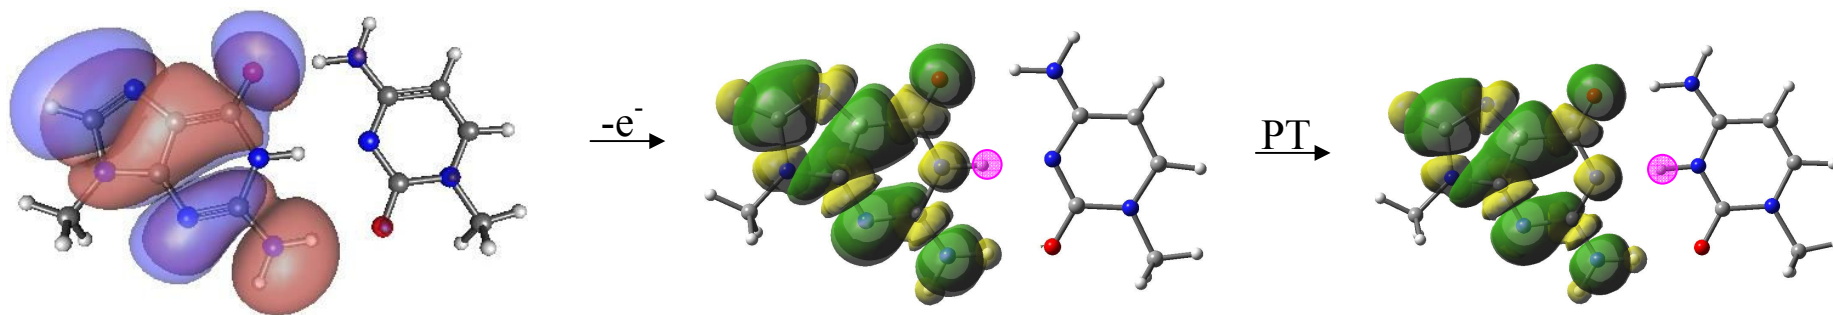

### Neutral (singlet)

MO = HOMO

TE = -1015.94611414 A.U. ( $\omega$ b97x)

TE = -1016.19297948 A.U. (B3LYP)

TE = -1015.78110991 A.U. (M06-2x)

### Radical cation ( $G^{+-}C$ )

Spin density plot

TE (vert) = -1015.68008855 A.U. ( $\omega$ b97x)

TE (opt) = -1015.69568698 A.U. ( $\omega$ b97x)

TE (vert) = -1015.93337387 A.U. (B3LYP)

TE (opt) = -1015.94596270 A.U. (B3LYP)

TE (vert) = -1015.51156628 A.U. (M06-2x)

TE (opt) = -1015.52696491 A.U. (M06-2x)

---

### IP = TE ( $G^{+-}C$ ) – TE (Neutral)

IP (vert) = 7.24 eV ( $\omega$ b97x)

IP (adia) = 6.81 eV ( $\omega$ b97x)

IP (vert) = 7.06 eV (B3LYP)

IP (adia) = 6.72 eV (B3LYP)

IP (vert) = 7.33 eV (M06-2x)

IP (adia) = 6.91 eV (M06-2x)

### Radical cation PT ( $G(N1-H)^{\bullet}-(N3-H^+)C$ )

Spin density plot

TE (opt) = -1015.69399298 A.U. ( $\omega$ b97x)

TE (opt) = -1015.94451492 A.U. (B3LYP)

TE (opt) = -1015.52500566 A.U. (M06-2x)

### Stability ( $\Delta E$ ) with respect to $G^{+-}C$

$\Delta E = TE (G^{+-}C) - TE (G(N1-H)^{\bullet}-(N3-H^+)C)$

$\Delta E = 1.06$  kcal/mol ( $\omega$ b97x)

$\Delta E = 0.91$  kcal/mol (B3LYP)

$\Delta E = 1.23$  kcal/mol (M06-2x)

---

### IP = TE ( $G(N1-H)^{\bullet}-(N3-H^+)C$ ) – TE (Neutral)

IP (adia) = 6.86 eV ( $\omega$ b97x)

IP (adia) = 6.76 eV (B3LYP)

IP (adia) = 6.97 eV (M06-2x)

**Figure S14-** Calculated vertical and adiabatic ionization potentials (IP(vert) and IP(adia)) in eV of G-C base pair using  $\omega$ b97x/6-31++G(d), B3LYP/6-31++G(d) and M06-2x/6-31++G(d) methods. Relative stability between  $G^{+-}C$  and  $G(N1-H)^{\bullet}-(N3-H^+)C$  are given in kcal/mol. TE = Total energy in A.U.

## G<sup>+</sup>-C (radical cation)

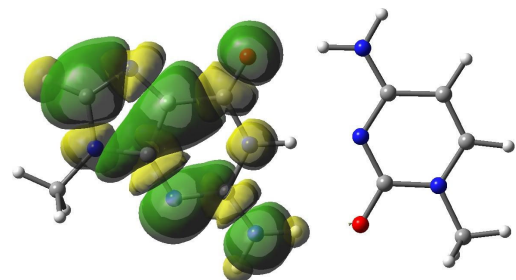

### Radical cation (G<sup>+</sup>-C) (doublet)

Spin density plot

TE = -1015.69568698 A.U. ( $\omega$ b97x)  
 TE = -1015.94596270 A.U. (B3LYP)  
 TE = -1015.52696491 A.U. (M06-2x)

Stability between triplet (G<sup>+</sup>-C<sup>+</sup>) and proton transferred singlet G(-H)<sup>+</sup>-(H<sup>+</sup>)C.

$\Delta E = TE (\text{Triplet}) - TE (\text{Singlet})$

$\Delta E = -1015.28161379 - (-1015.29846906)$   
 = 10.58 kcal/mol ( $\omega$ b97x)

Singlet PT G(-H)<sup>+</sup>-(H<sup>+</sup>)C is more stable than triplet (G<sup>+</sup>-C<sup>+</sup>) by 10.58 kcal/mol

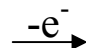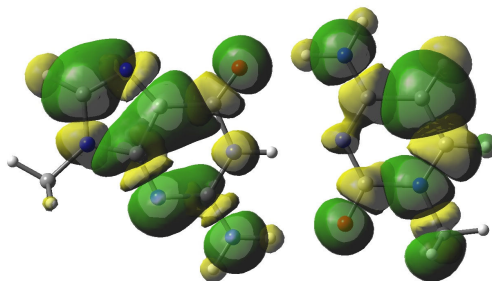

### (a) Second oxidation (G-C)<sup>+2</sup> (Triplet)

Spin density plot for triplet state

TE (vert) = -1015.26666609 A.U. ( $\omega$ b97x)  
 TE (opt) = -1015.28161379 A.U. ( $\omega$ b97x)  
 TE (vert) = -1015.52395015 A.U. (B3LYP)  
 TE (opt) = -1015.53679652 A.U. (B3LYP)  
 TE (vert) = -1015.09437387 A.U. (M06-2x)  
 TE (opt) = -1015.10996435 A.U. (M06-2x)

IP = TE (A-T)<sup>+2</sup> - TE (A<sup>+</sup>-T)

IP (vert) = 11.67 eV ( $\omega$ b97x)  
 IP (adia) = 11.26 eV ( $\omega$ b97x)  
 IP (vert) = 11.48 eV (B3LYP)  
 IP (adia) = 11.13 eV (B3LYP)  
 IP (vert) = 11.77 eV (M06-2x)  
 IP (adia) = 11.34 eV (M06-2x)

Stability with respect to singlet state

$\Delta E = TE (\text{a}) - TE (\text{b})$

$\Delta E = 1.98$  kcal/mol ( $\omega$ b97x)  
 $\Delta E = -7.40$  kcal/mol ( $\omega$ b97x) (N2-H constrained)  
 $\Delta E = -2.95$  kcal/mol (B3LYP)  
 $\Delta E = 6.42$  kcal/mol (M06-2x)

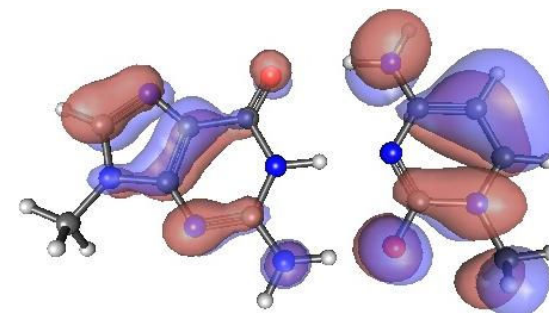

### (b) Second oxidation (G-C)<sup>+2</sup> (Singlet)

MO=HOMO plot (B3LYP calculation)

TE (vert) = -1015.25134796 A.U. ( $\omega$ b97x)  
<sup>a</sup>TE (opt) = -1015.28477708 A.U. ( $\omega$ b97x)  
<sup>b</sup>TE (opt) = -1015.26982257 A.U. ( $\omega$ b97x)  
 TE (vert) = -1015.52711892 A.U. (B3LYP)  
<sup>c</sup>TE (opt) = -1015.53209904 A.U. (B3LYP)  
 TE (vert) = -1015.08866281 A.U. (M06-2x)  
<sup>a</sup>TE (opt) = -1015.12019052 A.U. (M06-2x)  
<sup>d</sup>TE (vert) = -1015.27998771 A.U. ( $\omega$ b97x)  
<sup>d</sup>TE (adia) = -1015.29846906 A.U. ( $\omega$ b97x)

IP = TE (G-C)<sup>+2</sup> - TE (G<sup>+</sup>-C)

IP (vert) = 12.09 eV ( $\omega$ b97x)  
 IP (adia) = 11.18 eV ( $\omega$ b97x)  
 IP (vert) = 11.39 eV (B3LYP)  
 IP (adia) = 11.26 eV (B3LYP)  
 IP (vert) = 11.92 eV (M06-2x)  
 IP (adia) = 11.06 eV (M06-2x)

<sup>a</sup>N2 proton of G transfers to O2 of C.

<sup>b</sup>N2-H bond constrained.

<sup>c</sup>No proton transfer.

<sup>d</sup>N1 proton of G transferred to N3 of C.

**Figure S15-** Calculated vertical and adiabatic ionization potentials (IP(vert) and IP(adia)) in eV of G<sup>+</sup>-C in their singlet and triplet states using  $\omega$ b97x/6-31++G(d), B3LYP/6-31++G(d) and M06-2x/6-31++G(d) methods. Relative stability between singlet and triplet are given in kcal/mol. TE = Total energy in A.U.

## Guanine (G)

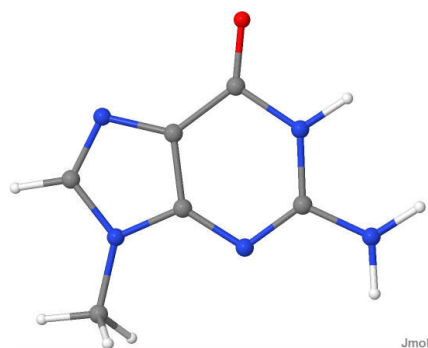

### Neutral (singlet)

TE = -581.747913109 A.U. ( $\omega$ b97x)  
TE = -581.889089657 A.U. (B3LYP)  
TE = -581.657966434 A.U. (M06-2x)

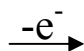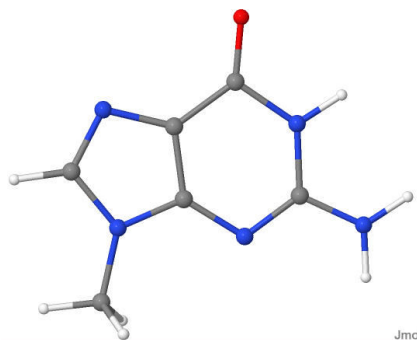

### Radical cation (G<sup>+•</sup>)

TE (vert) = -581.459093506 A.U. ( $\omega$ b97x)  
TE (opt) = -581.471021197 A.U. ( $\omega$ b97x)  
TE (vert) = -581.605962036 A.U. (B3LYP)  
TE (opt) = -581.614942395 A.U. (B3LYP)  
TE (vert) = -581.365594326 A.U. (M06-2x)  
TE (opt) = -581.377091553 A.U. (M06-2x)

-----  
**IP = TE (G<sup>+•</sup>) – TE (Neutral)**

IP (vert) = 7.86 eV ( $\omega$ b97x)  
IP (adia) = 7.53 eV ( $\omega$ b97x)  
IP (vert) = 7.70 eV (B3LYP)  
IP (adia) = 7.46 eV (B3LYP)  
IP (vert) = 7.95 eV (M06-2x)  
IP (adia) = 7.64 eV (M06-2x)

**Figure S16-** Calculated vertical and adiabatic ionization potentials (IP(vert) and IP(adia)) in eV of guanine (G) using  $\omega$ b97x/6-31++G(d), B3LYP/6-31++G(d) and M06-2x/6-31++G(d) methods. TE = Total energy in A.U.

### Guanine(N1-H)<sup>•</sup> (G(N1-H)<sup>•</sup>)

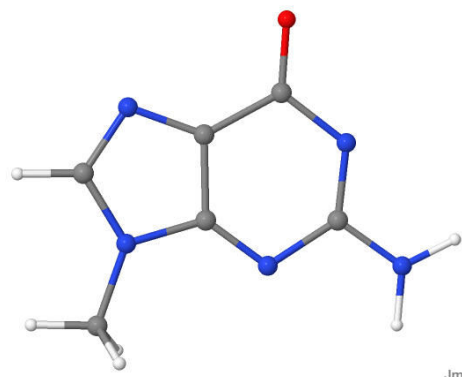

Jmol

#### G(N1-H)<sup>•</sup> (radical) (Doublet)

TE = -581.090313917 A.U. ( $\omega$ b97x)  
TE = -581.235723535 A.U. (B3LYP)  
TE = -581.000771446 A.U. (M06-2x)

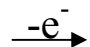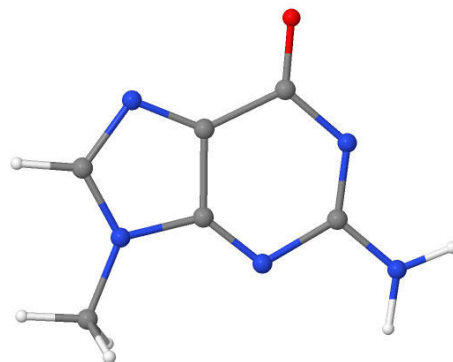

Jmol

#### G(N1-H)<sup>+</sup> (cation) (singlet)

TE (vert) = -580.774676731 A.U. ( $\omega$ b97x)  
TE (opt) = -580.788417533 A.U. ( $\omega$ b97x)  
TE (vert) = -580.927782189 A.U. (B3LYP)  
TE (opt) = -580.937748191 A.U. (B3LYP)  
TE (vert) = -580.687273366 A.U. (M06-2x)  
TE (opt) = -580.700404873 A.U. (M06-2x)

---

#### IP = TE (A(N6-H)<sup>+</sup>) - TE (A(N6-H)<sup>•</sup>)

IP (vert) = 8.56 eV ( $\omega$ b97x)  
IP (adia) = 8.21 eV ( $\omega$ b97x)  
IP (vert) = 8.38 eV (B3LYP)  
IP (adia) = 8.11 eV (B3LYP)  
IP (vert) = 8.53 eV (M06-2x)  
IP (adia) = 8.17 eV (M06-2x)

**Figure S17-** Calculated vertical and adiabatic ionization potentials (IP(vert) and IP(adia)) in eV of G(N1-H)<sup>•</sup> using  $\omega$ b97x/6-31++G(d), B3LYP/6-31++G(d) and M06-2x/6-31++G(d) methods. TE = Total energy in A.U.

## Guanine radical cation ( $G^{\bullet+}$ )

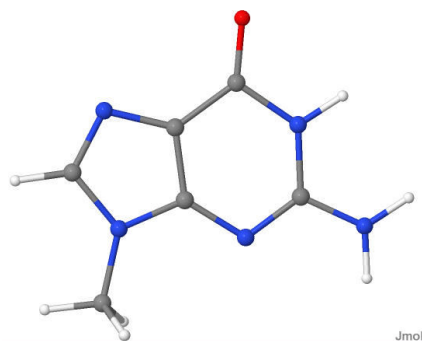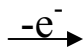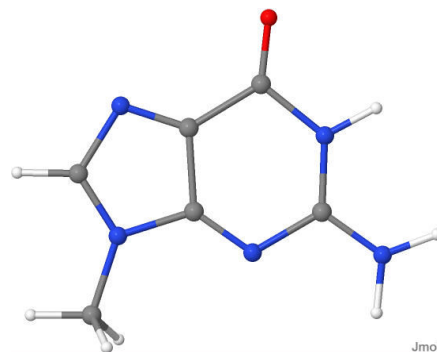

### $G^{\bullet+}$ (Radical cation) (doublet)

TE (opt) = -581.471021197 A.U. ( $\omega$ b97x)  
 TE (opt) = -581.614942395 A.U. (B3LYP)  
 TE (opt) = -581.377091553 A.U. (M06-2x)

### Second oxidation ( $G^{+2}$ ) (Singlet)

TE (vert) = -580.989113814 A.U. ( $\omega$ b97x)  
 TE (opt) = -581.005429558 A.U. ( $\omega$ b97x)  
 TE (vert) = -581.138688404 A.U. (B3LYP)  
 TE (opt) = -581.150880209 A.U. (B3LYP)  
 TE (vert) = -580.896431642 A.U. (M06-2x)  
 TE (opt) = -580.911763880 A.U. (M06-2x)

### Second oxidation ( $G^{+2}$ ) (Triplet)

TE (vert) = -580.909918324 A.U. ( $\omega$ b97x)  
 TE (opt) = -580.917287955 A.U. ( $\omega$ b97x)  
 TE (vert) = -581.096757380 A.U. (B3LYP)  
 TE (opt) = -581.105036675 A.U. (B3LYP)  
 TE (vert) = -580.832057805 A.U. (M06-2x)  
 TE (opt) = -580.845329132 A.U. (M06-2x)

---

#### IP = TE ( $G^{+2}$ ) – TE ( $G^{\bullet+}$ )

IP (vert) = 13.11 eV ( $\omega$ b97x)  
 IP (adia) = 12.66 eV ( $\omega$ b97x)  
 IP (vert) = 12.95 eV (B3LYP)  
 IP (adia) = 12.62 eV (B3LYP)  
 IP (vert) = 13.07 eV (M06-2x)  
 IP (adia) = 12.66 eV (M06-2x)

---

#### IP = TE ( $G^{+2}$ ) – TE ( $G^{\bullet+}$ )

IP (vert) = 15.26 eV ( $\omega$ b97x)  
 IP (adia) = 15.06 eV ( $\omega$ b97x)  
 IP (vert) = 14.10 eV (B3LYP)  
 IP (adia) = 13.87 eV (B3LYP)  
 IP (vert) = 14.83 eV (M06-2x)  
 IP (adia) = 14.46 eV (M06-2x)

---

#### Stability with respect to triplet state

##### $\Delta E = TE$ (Singlet) – $TE$ (Triplet)

$\Delta E = -55.31$  kcal/mol ( $\omega$ b97x)  
 $\Delta E = -28.77$  kcal/mol (B3LYP)  
 $\Delta E = -41.67$  kcal/mol

**Figure S18-** Calculated vertical and adiabatic ionization potentials (IP(vert) and IP(adia)) in eV of  $G^{\bullet+}$  (guanine radical cation) in singlet and triplet states using  $\omega$ b97x/6-31++G(d), B3LYP/6-31++G(d) and M06-2x/6-31++G(d) methods. TE = Total energy in A.U.



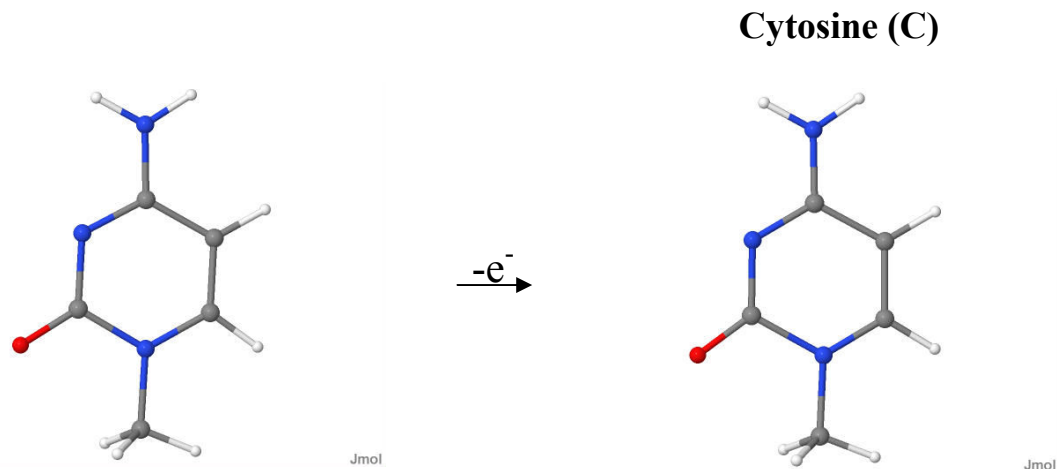

**Neutral (singlet)**

TE = -434.150198337 A.U. ( $\omega$ b97x)  
 TE = -434.261420915 A.U. (B3LYP)  
 TE = -434.076423881 A.U. (M06-2x)

**Radical cation (C<sup>+</sup>)**

TE (vert) = -433.834382543 A.U. ( $\omega$ b97x)  
 TE (opt) = -433.839767490 A.U. ( $\omega$ b97x)  
 TE (vert) = -433.952581050 A.U. (B3LYP)  
 TE (opt) = -433.956446932 A.U. (B3LYP)  
 TE (vert) = -433.757561488 A.U. (M06-2x)  
 TE (opt) = -433.762942696 A.U. (M06-2x)

-----  
**IP = TE (G<sup>+</sup>) – TE (Neutral)**

IP (vert) = 8.59 eV ( $\omega$ b97x)  
 IP (adia) = 8.44 eV ( $\omega$ b97x)  
 IP (vert) = 8.40 eV (B3LYP)  
 IP (adia) = 8.30 eV (B3LYP)  
 IP (vert) = 8.67 eV (M06-2x)  
 IP (adia) = 8.53 eV (M06-2x)

**Figure S19-** Calculated vertical and adiabatic ionization potentials (IP(vert) and IP(adia)) in eV of cytosine (C) using  $\omega$ b97x/6-31++G(d), B3LYP/6-31++G(d) and M06-2x/6-31++G(d) methods. TE = Total energy in A.U.

## N3-protonated Cytosine (C(N3-H<sup>+</sup>))

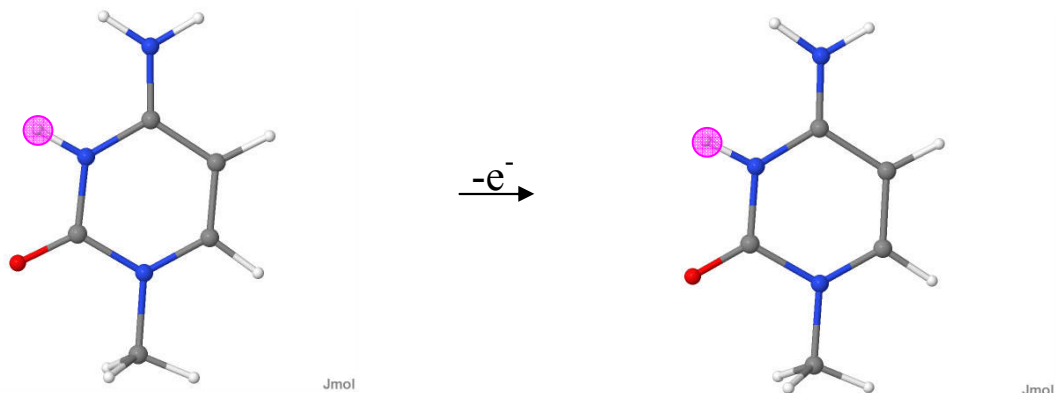

### C(N3-H<sup>+</sup>) (Neutral) (singlet)

TE = -434.529441519 A.U. ( $\omega$ b97x)  
TE = -434.639761425 A.U. (B3LYP)  
TE = -434.450664107 A.U. (M06-2x)

### Radical cation (C(N3-H<sup>+</sup>)<sup>•+</sup>)

TE (vert) = -434.027724467 A.U. ( $\omega$ b97x)  
TE (opt) = -434.035094549 A.U. ( $\omega$ b97x)  
TE (vert) = -434.143389228 A.U. (B3LYP)  
TE (opt) = -434.148497719 A.U. (B3LYP)  
TE (vert) = -433.945572625 A.U. (M06-2x)  
TE (opt) = -433.952763917 A.U. (M06-2x)

-----  
**IP = TE (T<sup>•+</sup>) – TE (Neutral)**

IP (vert) = 13.65 eV ( $\omega$ b97x)  
IP (adia) = 13.45 eV ( $\omega$ b97x)  
IP (vert) = 13.50 eV (B3LYP)  
IP (adia) = 13.36 eV (B3LYP)  
IP (vert) = 13.74 eV (M06-2x)  
IP (adia) = 13.54 eV (M06-2x)

**Figure S20-** Calculated vertical and adiabatic ionization potentials (IP(vert) and IP(adia)) in eV of N3-protonated cytosine (C(N3-H<sup>+</sup>)) using  $\omega$ b97x/6-31++G(d), B3LYP/6-31++G(d) and M06-2x/6-31++G(d) methods. TE = Total energy in A.U.

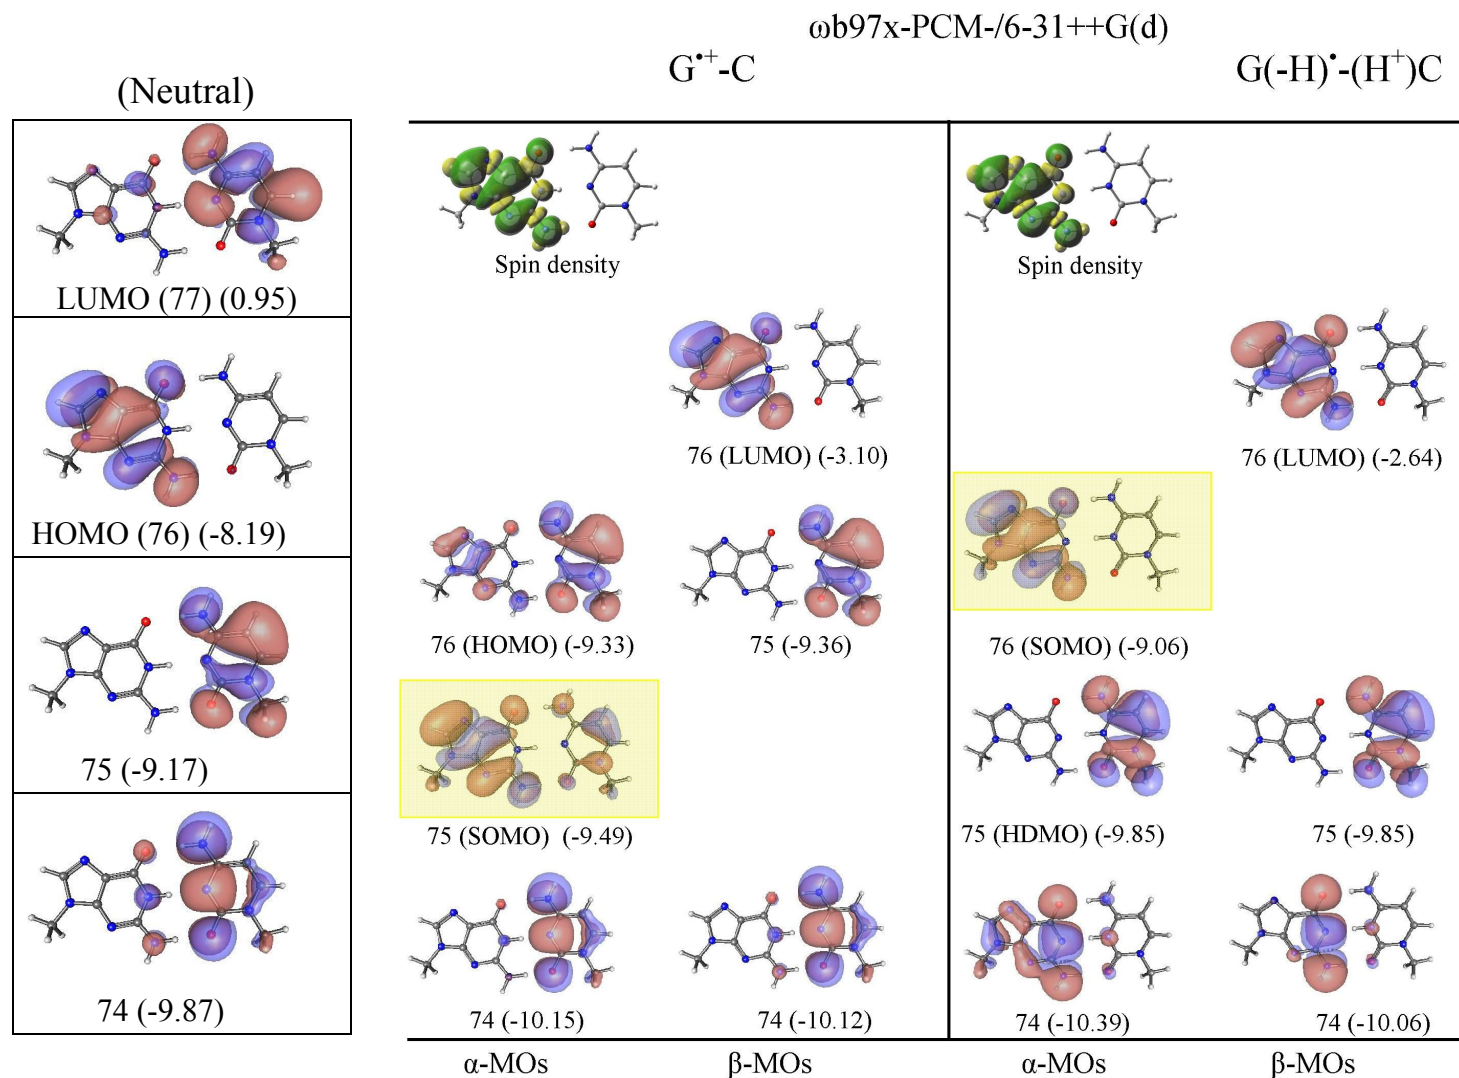

**Figure S21-** Molecular orbital (MO) plots of G-C base pair in their neutral, radical cation ( $G^{\bullet+}$ -C) and proton transferred radical cation  $G(-H)^{\bullet-}$ -C( $H^+$ ) states **in solution using polarized continuum model (PCM)**. Spin density distributions of  $G^{\bullet+}$ -C and  $G(-H)^{\bullet-}$ -C( $H^+$ ) are also shown. Below each figure MO number and its energy in eV in parentheses are given. Calculations were done using the  $\omega$ b97x-PCM/6-31++G(d) method.

$\omega$ b97x-PCM-/6-31++G(d)

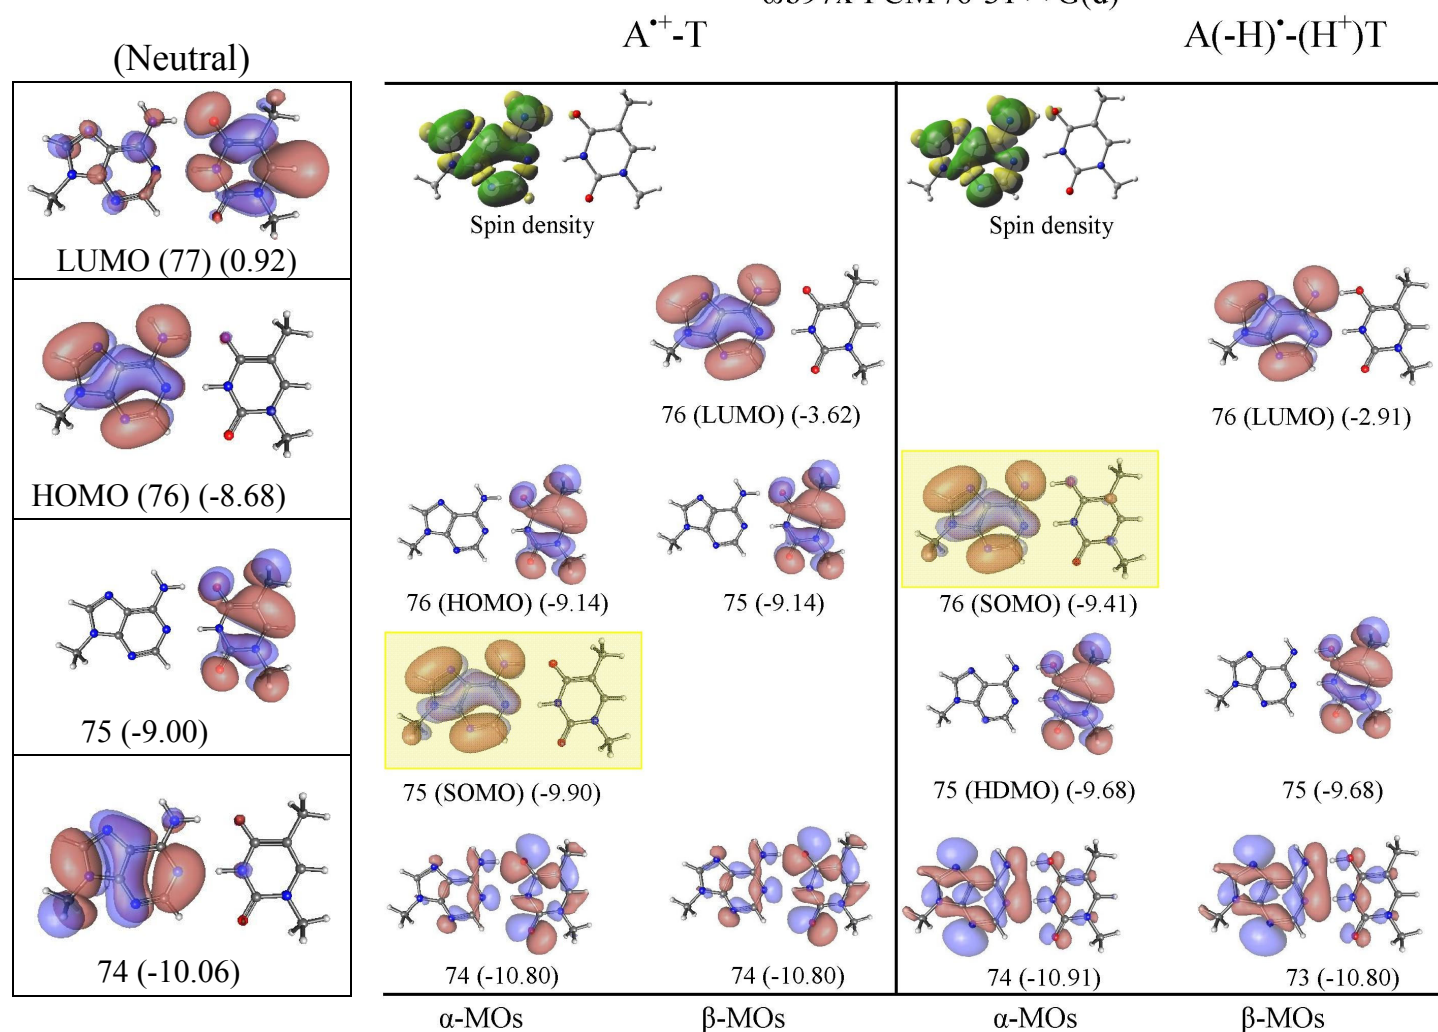

**Figure S22-** Molecular orbital (MO) plots of A-T base pair in their neutral, radical cation ( $A^{\bullet+}$ -T) and proton transferred radical cation  $A(-H)^{\bullet-}$ - $A(H^+)$  states in solution using polarized continuum model (PCM). Spin density distributions of  $A^{\bullet+}$ -T and  $A(-H)^{\bullet-}$ - $T(H^+)$  are also shown. Below each figure MO number and its energy in eV in parentheses are given. Calculations were done using the  $\omega$ b97x-PCM/6-31++G(d) method.

$\omega$ b97x/6-31G(d)

(Neutral)

 $(5'-G^{+\bullet}-3')\cdot(3'-C-5')$  $(5'-G(-H)^{\bullet}-3')-(3'-(H^+)C-5')$ 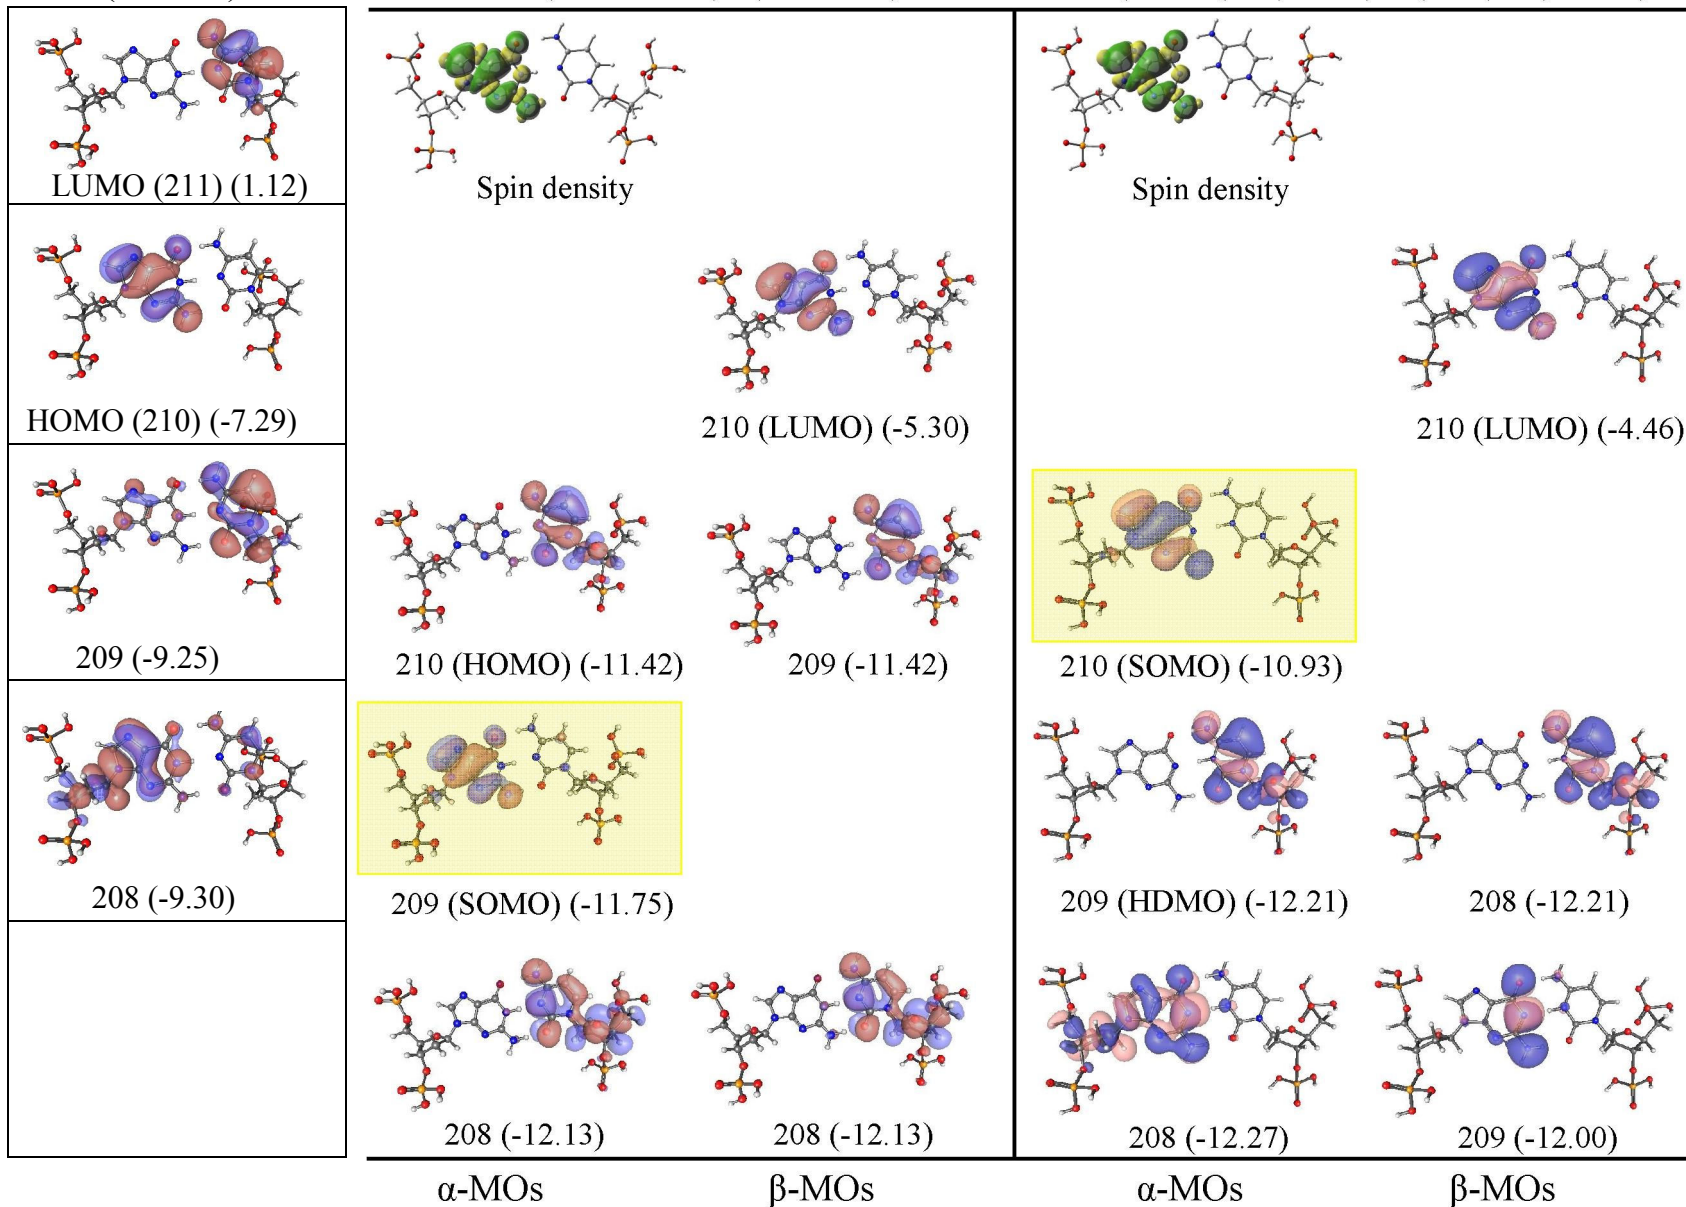

**Figure S23-** Molecular orbital (MO) plots of  $(5'-G-3')\cdot(3'-C-5')$  in their neutral, radical cation  $(5'-G^{+\bullet}-3')\cdot(3'-C-5')$  and proton transferred radical cation  $(5'-G(-H)^{\bullet}-3')\cdot(3'-(H^+)C-5')$  states. Spin density distributions of  $(5'-G^{+\bullet}-3')\cdot(3'-C-5')$  and  $(5'-G(-H)^{\bullet}-3')\cdot(3'-(H^+)C-5')$  are also shown. Below each figure MO number and its energy in eV in parentheses are given. Calculations were done using the  $\omega$ b97x/6-31G(d) method to save computational time.

(5'-G-3')•(3'-C-5')    ωb97x/6-31G(d)

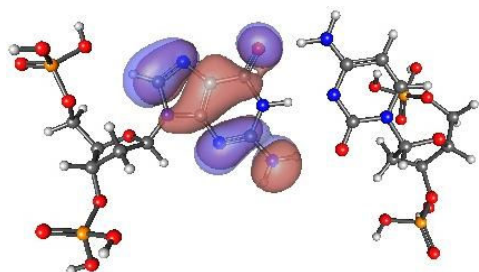

**Neutral (singlet)**

MO = HOMO

TE = -4049.73526111 A.U.

$-e^-$

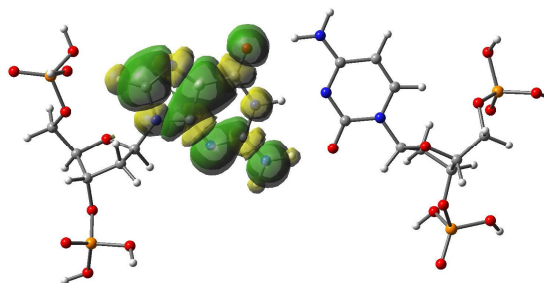

**Radical cation ( $G^{+}-C$ )**

Spin density plot

TE (Vert) = -4049.48174210 A.U.

TE (adia) = -4049.50359926 A.U.

-----  
**IP = TE ( $G^{+}-C$ ) – TE (Neutral)**

IP (vert) = 6.90 eV

IP (adia) = 6.30 eV

PT

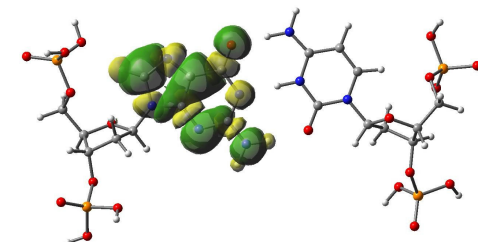

**Radical cation PT ( $G(N1-H)^{\bullet}-(N3-H^+)C$ )**

Spin density plot

TE (opt) = -4049.50198471 A.U.

**Stability ( $\Delta E$ ) with respect to  $G^{+}-C$**

$\Delta E = TE (G^{+}-C) - TE ((G(N1-H)^{\bullet}-(N3-H^+)C)$

$\Delta E = 1.01 \text{ kcal/mol}$

-----  
**IP = TE ( $G(N1-H)^{\bullet}-(N3-H^+)C$ ) – TE (Neutral)**

IP (adia) = 6.35 eV

**Figure S24-** Calculated vertical and adiabatic ionization potentials (IP(vert) and IP(adia)) in eV of (5'-G-3')•(3'-C-5') using the ωb97x/6-31G(d) method. Relative stability between (5'-G<sup>+</sup>-3')•(3'-C-5') and proton transferred (5'-G(-H)<sup>•</sup>-3')•(3'-(H<sup>+</sup>)C-5') in kcal/mol. TE = Total energy in A.U.

(5'-G<sup>+</sup>-3')•d(3'-C-5') (radical cation) ωb97x/6-31G(d)

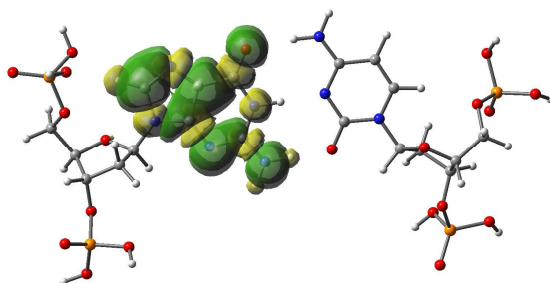

**Radical cation (G<sup>+</sup>-C)**  
Spin density plot  
TE = -4049.50359926 A.U.

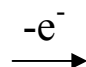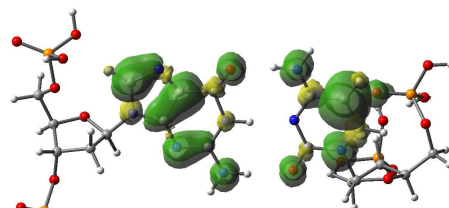

**Radical cation (G<sup>+</sup>-C<sup>+</sup>) (Triplet state)**

Spin density plot  
TE (Vert) = -4049.10014032 A.U.  
TE (adia) = -4049.13879653 A.U.

IP = TE (G<sup>+</sup>-C<sup>+</sup>) - TE (G<sup>+</sup>-C)  
IP (vert) = 10.97 eV  
IP (adia) = 9.92 eV

**Relative stability between triplet and singlet states**

-----  
 $\Delta E = \text{TE (G<sup>+</sup>-C<sup>+</sup>) (triplet)} - \text{TE (G(N1-H)<sup>-</sup>-(N3-H<sup>+</sup>)C) (singlet)}$   
 $\Delta E = -4049.13879653 - -4049.14517879$   
= 4.0 kcal/mol

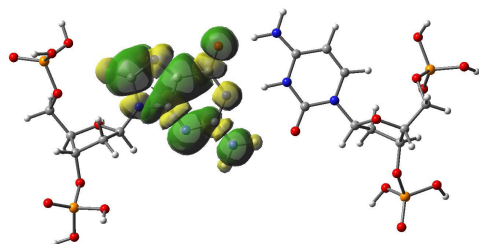

**Radical cation PT (G(-H)<sup>-</sup>-(-H<sup>+</sup>)C)**  
Spin density plot  
TE = -4049.50198471 A.U.

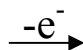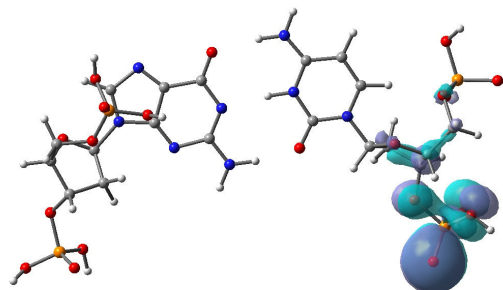

**Radical cation PT (G(-H)<sup>+</sup>-(-H<sup>+</sup>)C) (Singlet state)**

HOMO plot  
TE (vert) = -4049.11436183 A.U.  
TE (adia) = -4049.14517879 A.U.

-----  
IP = TE (G(N1-H)<sup>-</sup>-(N3-H<sup>+</sup>)C) - TE (G(-H)<sup>+</sup>-(-H<sup>+</sup>)C)  
IP (vert) = 10.54 eV  
IP (adia) = 9.71 eV

**Figure S25-** Calculated vertical and adiabatic ionization potentials (IP(vert) and IP(adia)) in eV of (5'-G<sup>+</sup>-3')•(3'-C-5') and (5'-G(-H)<sup>-</sup>-3')•(3'-(H<sup>+</sup>)C-5') in triplet and singlet states using the ωb97x/6-31G(d) method. Relative stability between triplet and singlet states in kcal/mol. TE = Total energy in A.U.

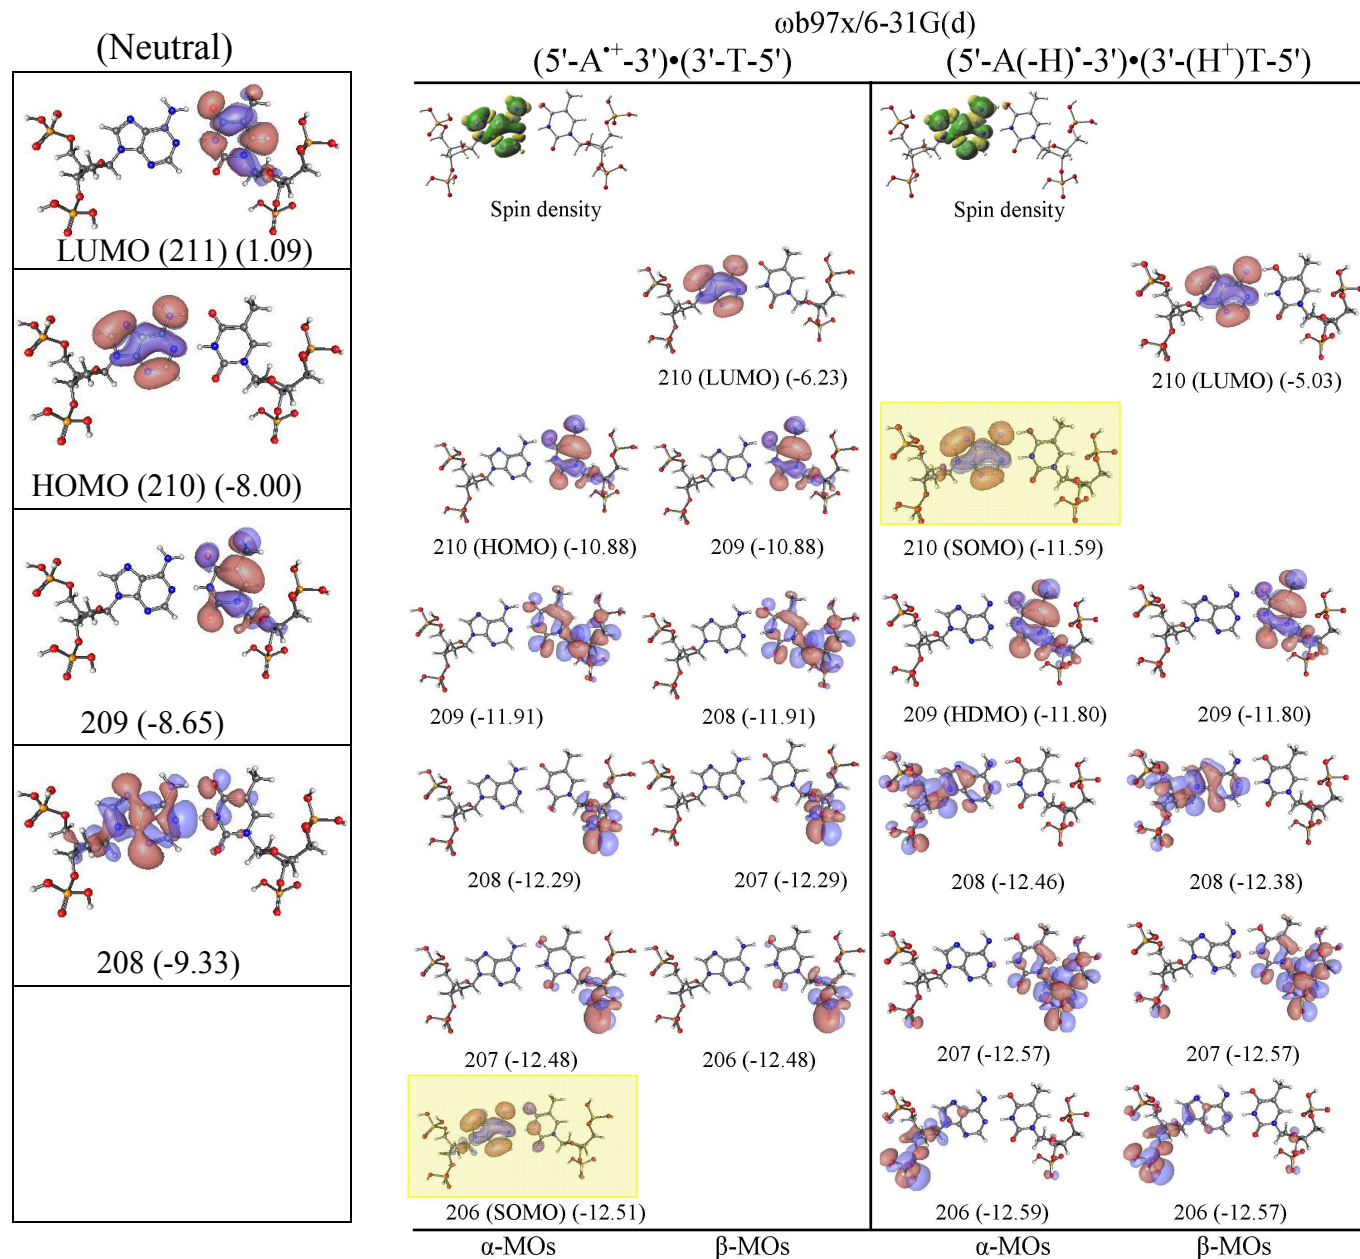

**Figure S26-** Molecular orbital (MO) plots of  $(5'-A-3')\cdot(3'-T-5')$  in their neutral, radical cation  $(5'-A^{++}-3')\cdot(3'-T-5')$  and proton transferred radical cation  $(5'-A(-H)\cdot-3')\cdot(3'-(H^+)T-5')$  states. Spin density distributions of  $(5'-A^{++}-3')\cdot(3'-T-5')$  and  $(5'-A(-H)\cdot-3')\cdot(3'-(H^+)T-5')$  are also shown. Below each figure MO number and its energy in eV in parentheses are given. Calculations were done using the  $\omega$ b97x/6-31G(d) method to save computational time.



(5'-A-3')•(3'-T-5') ωb97x/6-31G(d)

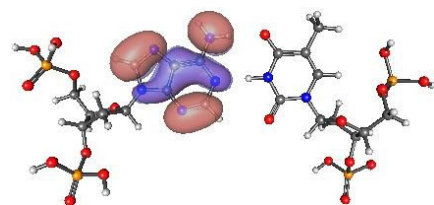

**Neutral (singlet)**

MO = HOMO

TE = -4033.68803586 A.U.

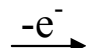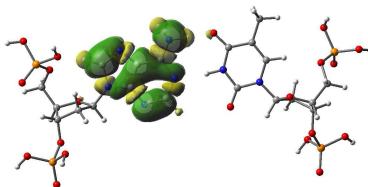

**Radical cation (A<sup>+</sup>-T)**

Spin density plot

TE (Vert) = -4033.40707046 A.U.

TE (adia) = -4033.42640196 A.U.

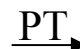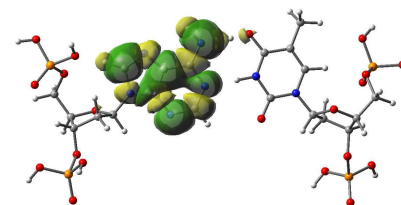

**Radical cation PT (A(N6-H)•-(O4-H<sup>+</sup>)T)**

Spin density plot

TE (opt) = -4033.42117433 A.U.

**Stability (ΔE) with respect to G<sup>+</sup>-C**

$\Delta E = TE (A^{+-}T) - TE ((A(N6-H)•-(O4-H^+)T)$

$\Delta E = 3.28 \text{ kcal/mol}$

-----  
 $IP = TE (A^{+-}T) - TE (\text{Neutral})$

IP (vert) = 7.64 eV

IP (adia) = 7.12 eV

-----  
 $IP = TE (A(N6-H)•-(O4-H^+)C) - TE (\text{Neutral})$

IP (adia) = 7.26 eV

**Figure S27-** Calculated vertical and adiabatic ionization potentials (IP(vert) and IP(adia)) in eV of (5'-A-3')•(3'-T-5') using the ωb97x/6-31G(d) method. Relative stability between (5'-A<sup>+</sup>-3')•(3'-T-5') and proton transferred (5'-A(-H)•-3')•(3'-(H<sup>+</sup>)T-5') in kcal/mol. TE = Total energy in A.U.

(5'-A<sup>+</sup>-3')•(3'-T-5') (radical cation) ωb97x/6-31G(d)

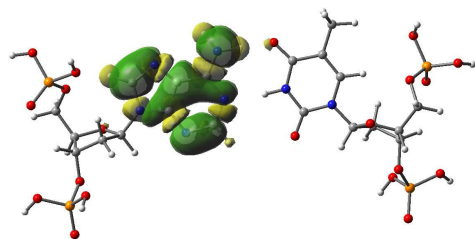

**Radical cation (A<sup>+</sup>-T)**  
Spin density plot  
TE = -4033.42640196 A.U.

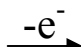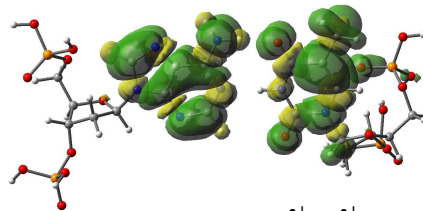

**Radical cation (A<sup>+</sup>-T<sup>+</sup>) (Triplet state)**  
Spin density plot  
TE (Vert) = -4033.04368994 A.U.  
TE (adia) = -4033.08318223 A.U.

-----  
**IP = TE (A<sup>+</sup>-T<sup>+</sup>) - TE (A<sup>+</sup>-T)**  
IP (vert) = 10.41 eV  
IP (adia) = 9.34 eV

**Relative stability between triplet and singlet states**

-----  
**ΔE = TE (A<sup>+</sup>-T<sup>+</sup>) (triplet) - TE (A(N6-H)<sup>+</sup>-(O4-H<sup>+</sup>)C) (singlet)**  
ΔE = -4033.08318223 - -4033.03666374  
= -29.19 kcal/mol

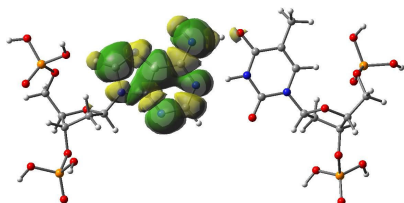

**Radical cation PT (A(-H)<sup>•</sup>-(H<sup>+</sup>)T)**  
Spin density plot  
TE (opt) = -4033.42117433 A.U.

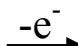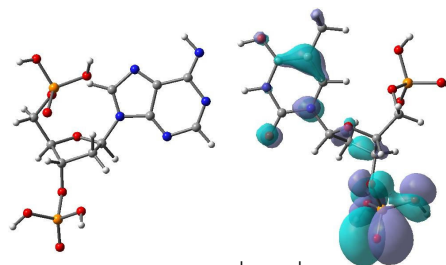

**Radical cation PT (A(-H)<sup>+</sup>-(H<sup>+</sup>)T) (Singlet state)**  
HOMO plot  
TE (vert) = -4033.00885614 A.U.  
TE (adia) = -4033.03666374 A.U.

-----  
**IP = TE (A(-H)<sup>•</sup>-(H<sup>+</sup>)T) - TE (A(-H)<sup>+</sup>-(H<sup>+</sup>)T)**  
IP (vert) = 11.22 eV  
IP (adia) = 10.46 eV

**Figure S28-** Calculated vertical and adiabatic ionization potentials (IP(vert) and IP(adia)) in eV of (5'-A<sup>+</sup>-3')•(3'-T-5') and (5'-A(-H)<sup>•</sup>-3')•(3'-(H<sup>+</sup>)A-5') in triplet and singlet states using the ωb97x/6-31G(d) method. Relative stability between triplet and singlet states in kcal/mol. TE = Total energy in A.U.

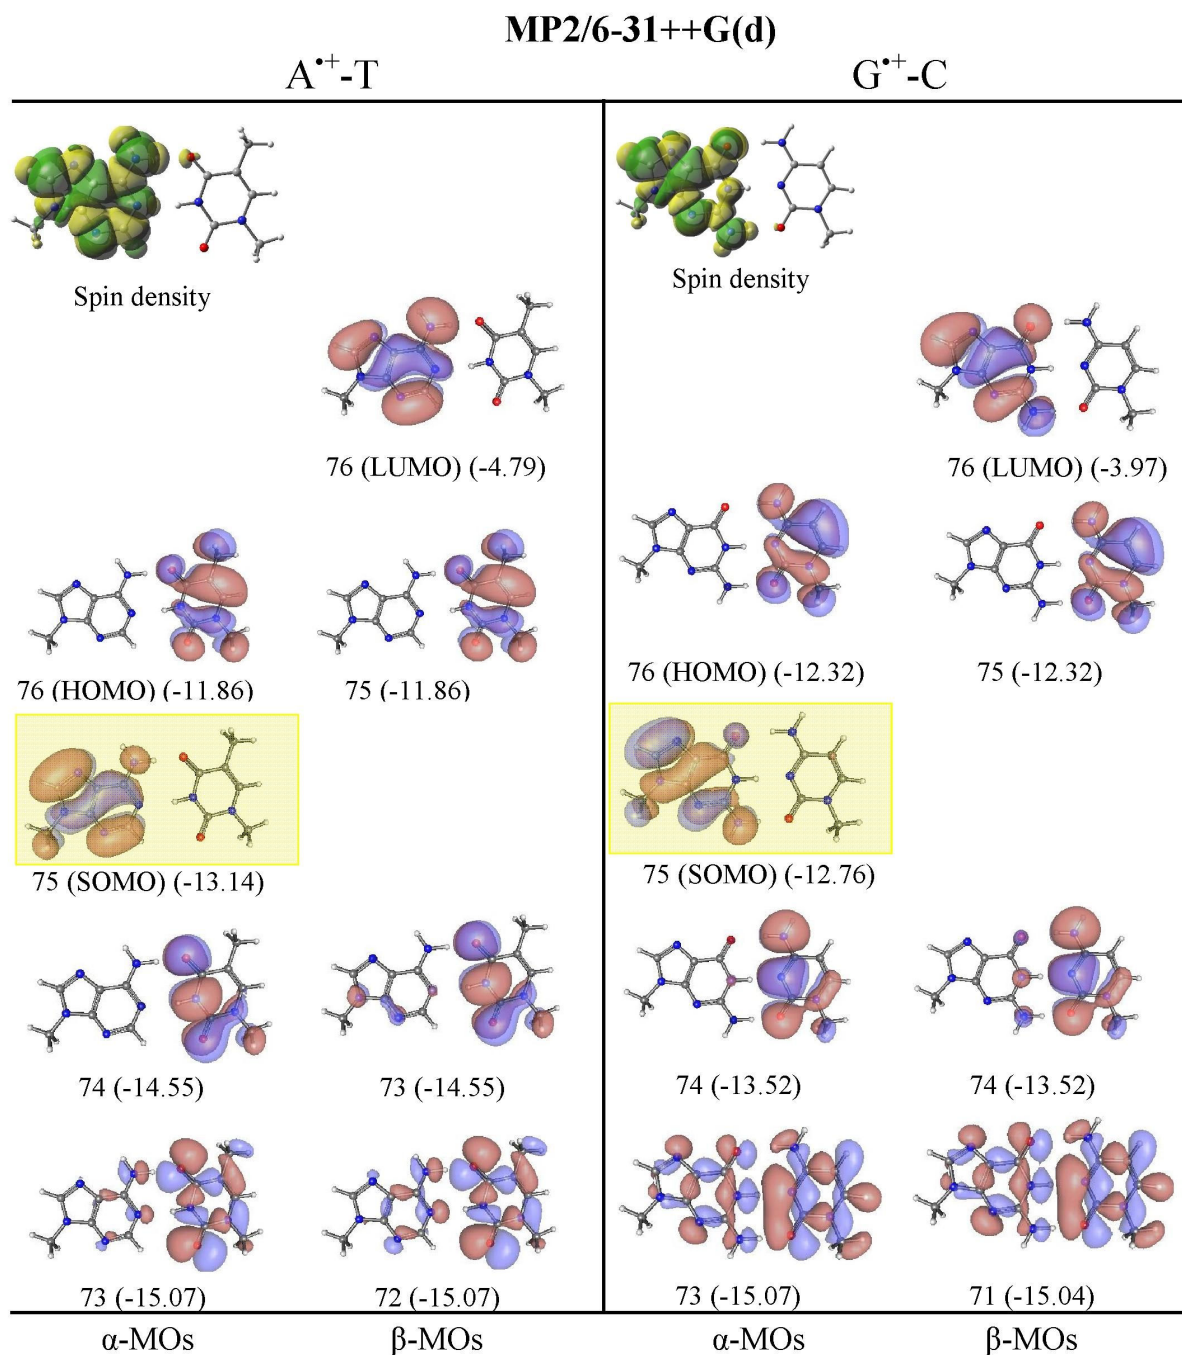

**Figure S29-** Molecular orbital (MO) plots of  $A^+-T$  and  $G^+-C$  base pair radical cations. Spin density distributions of  $A^+-T$  and  $G^+-C$  are also shown. Below each figure MO number and its energy in eV in parentheses are given. Calculations were done using the *ab initio* **MP2/6-31++G(D)** method using the  $\omega$ b97x/6-31++G(d) optimized geometries.

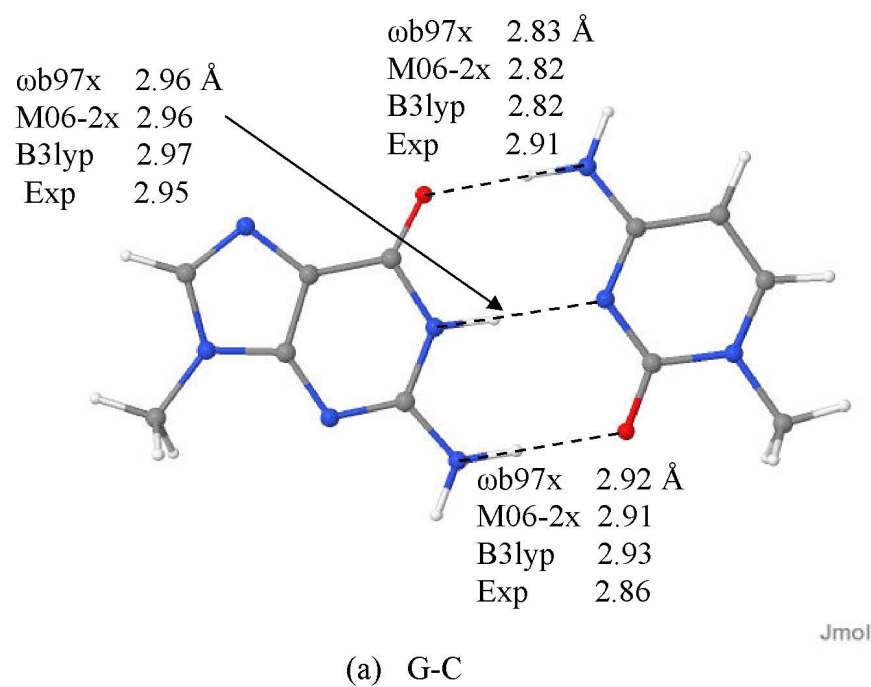

Jmol

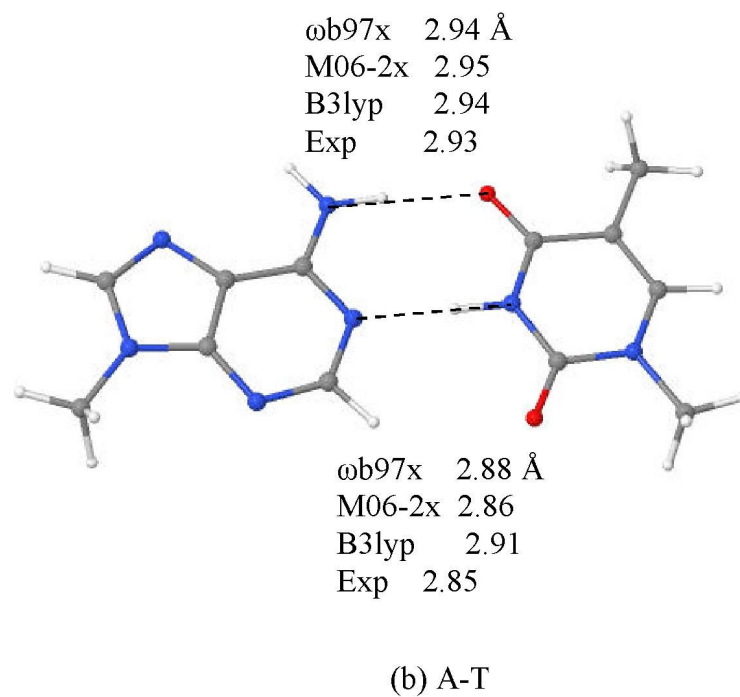

**Figure S30-** Calculated hydrogen-bond lengths in Å in neutral G-C and A-T base pairs. Experimental X-ray crystallographic<sup>a,b</sup> values are given in parentheses.

<sup>a</sup>Rosenberg, J. M.; Seeman, N. C.; Day, R. O.; Rich, A. *J. Mol. Biol.* **1976**, 104, 145. (For G-C)

<sup>b</sup>Seeman, N. C.; Rosenberg, J. M.; Suddath, F. L.; Kim, J. J. P.; Rich, A. *J Mol Biol* **1976**, 104, 109. (For A-T)

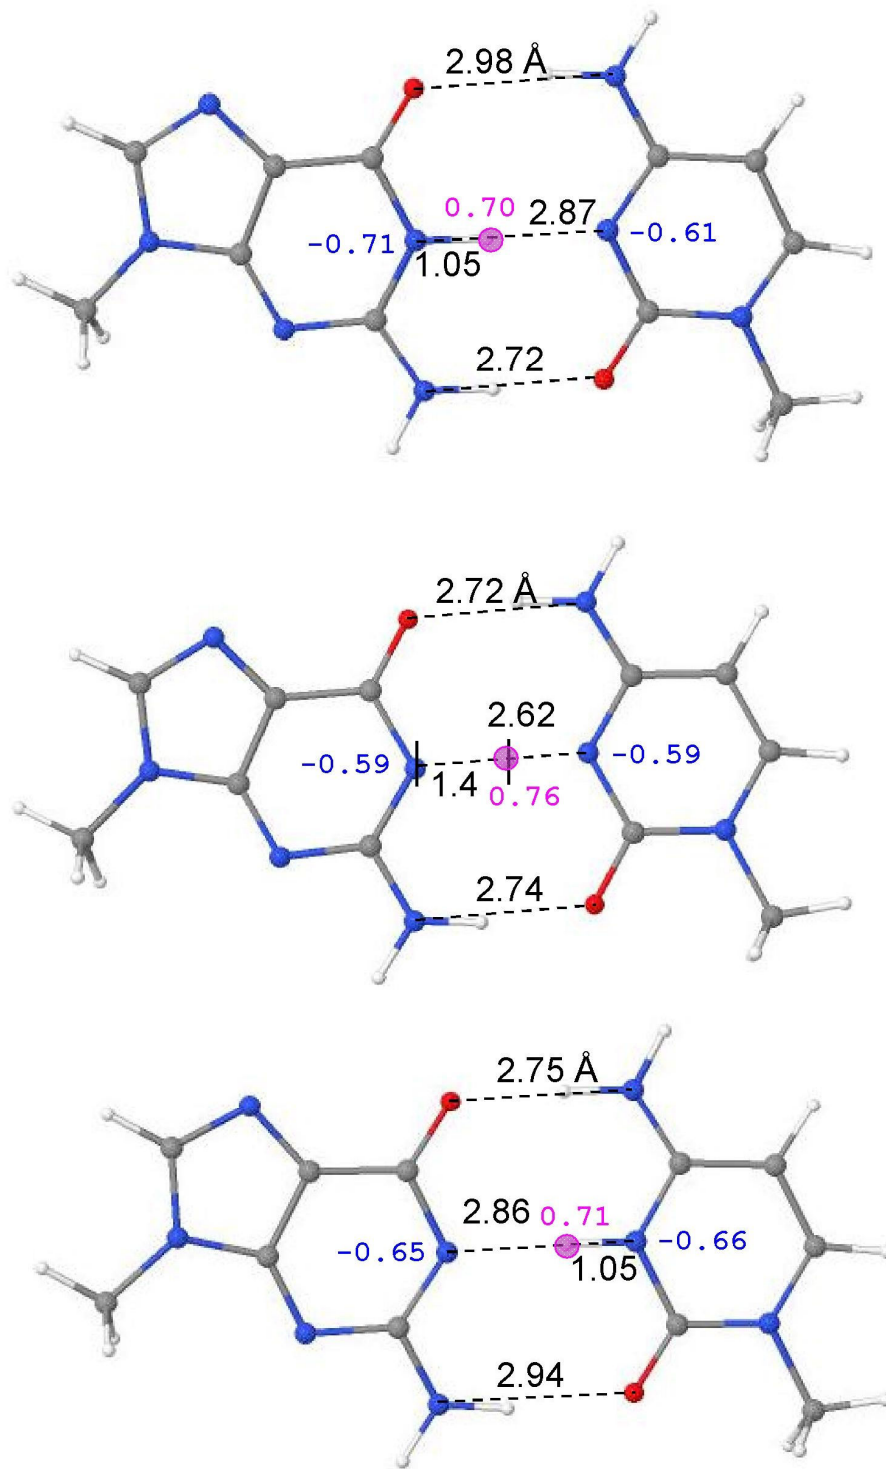

**Figure S31-**  $\omega$ b97x/6-31++G(d) calculated hydrogen-bond lengths in Å in radical cation of G-C base pair. (i)  $G^+ \cdots C$  (top figure), (ii) PT in between G and C in  $(G^+ \cdots C)^+$  (middle figure) and (iii) PT transferred  $G(H^+) \cdots C(H^+)$ . Mulliken charges of two nitrogens are given in blue color and  $H^+$  in pink color. Pink circle shows the location of the  $H^+$  between the two bases.

#CASSCF(11,11)/def2-SV(P) pop=full guess=alter

Charge = 1 Multiplicity = 2

TE = -993.1487521768 A.U.

| Orbital | Occupancy      |
|---------|----------------|
| 71      | 1.94601        |
| 72      | 1.95764        |
| 73      | 1.94978        |
| 74      | 1.99988        |
| 75      | 0.99893 (SOMO) |
| 76      | 1.93064 (HOMO) |
| 77      | 0.07058        |
| 78      | 0.05490        |
| 79      | 0.01000        |
| 80      | 0.04114        |
| 81      | 0.04051        |

#CASSCF(11,11)/def2-SV(P) pop=full

Charge = 1 Multiplicity = 2

TE = -993.1487516700 A.U. (Less stable than above)

| Orbital | Occupancy      |
|---------|----------------|
| 71      | 1.94601        |
| 72      | 1.95764        |
| 73      | 1.94973        |
| 74      | 1.99988        |
| 75      | 1.93064 (HOMO) |
| 76      | 0.99893 (SOMO) |
| 77      | 0.07058        |
| 78      | 0.05490        |
| 79      | 0.01001        |
| 80      | 0.04114        |
| 81      | 0.04052        |

#CASSCF(11,11)/6-31g\*\* pop=full guess=alter

Charge = 1 Multiplicity = 2

TE= -993.9796768451 A.U.

| Orbital | Occupancy      |
|---------|----------------|
| 71      | 1.94636        |
| 72      | 1.95860        |
| 73      | 1.94955        |
| 74      | 1.99988        |
| 75      | 0.99879 (SOMO) |
| 76      | 1.92954 (HOMO) |
| 77      | 0.07155        |
| 78      | 0.05469        |
| 79      | 0.01004        |
| 80      | 0.04031        |
| 81      | 0.04070        |

#CASSCF(11,11)/6-31g\*\* pop=full

Charge = 1 Multiplicity = 2

TE= -993.9796737162 A.U.

(Less stable than above)

| Orbital | Occupancy      |
|---------|----------------|
| 71      | 1.94631        |
| 72      | 1.95860        |
| 73      | 1.94955        |
| 74      | 1.99988        |
| 75      | 1.92954 (HOMO) |
| 76      | 0.99879 (SOMO) |
| 77      | 0.07155        |
| 78      | 0.05466        |
| 79      | 0.01008        |
| 80      | 0.04031        |
| 81      | 0.04073        |

# Optimized geometries

1. wb97x/6-31++G(d) optimized geometry of **neutral** A-T base pair.  
**TE = -999.896937614 A.U.**

Charge = 0 Multiplicity = 1

|   |           |           |           |
|---|-----------|-----------|-----------|
| 1 | 0.927475  | -0.138806 | -0.000096 |
| 7 | -0.912519 | -0.160623 | -0.000069 |
| 7 | -1.066199 | 2.157012  | -0.000018 |
| 6 | -1.663311 | 0.957302  | -0.000032 |
| 6 | -1.514085 | -1.364938 | -0.000079 |
| 7 | -2.811465 | -1.631755 | -0.000060 |
| 6 | -3.541376 | -0.503681 | -0.000024 |
| 6 | -3.066084 | 0.799725  | -0.000006 |
| 7 | -4.104793 | 1.710304  | 0.000040  |
| 6 | -5.172782 | 0.958198  | 0.000049  |
| 7 | -4.907863 | -0.390550 | 0.000009  |
| 8 | 1.878564  | 2.163674  | -0.000064 |
| 6 | 2.562844  | 1.139473  | -0.000064 |
| 7 | 1.968288  | -0.106378 | -0.000142 |
| 6 | 2.602534  | -1.328105 | -0.000061 |
| 7 | 3.987643  | -1.265997 | -0.000066 |
| 6 | 4.647314  | -0.056627 | 0.000031  |
| 6 | 4.024337  | 1.139129  | 0.000015  |
| 8 | 2.000242  | -2.390691 | 0.000071  |
| 6 | 4.740057  | 2.456554  | 0.000083  |
| 1 | -0.047693 | 2.233330  | -0.000013 |
| 1 | -1.636729 | 2.988512  | 0.000020  |
| 1 | -0.832725 | -2.214670 | -0.000105 |
| 1 | -6.192869 | 1.326041  | 0.000083  |
| 1 | 5.731958  | -0.131213 | 0.000104  |
| 1 | 4.466040  | 3.048427  | -0.879691 |
| 1 | 4.465904  | 3.048408  | 0.879828  |
| 1 | 5.825488  | 2.313009  | 0.000167  |
| 6 | -5.852000 | -1.489831 | 0.000001  |
| 1 | -5.708714 | -2.108715 | -0.889448 |
| 1 | -5.708613 | -2.108810 | 0.889367  |
| 1 | -6.865094 | -1.081298 | 0.000080  |
| 6 | 4.702701  | -2.536089 | 0.000239  |
| 1 | 4.439360  | -3.117612 | 0.887271  |
| 1 | 4.437899  | -3.118753 | -0.885591 |
| 1 | 5.775318  | -2.332476 | -0.000790 |



2. wb97x/6-31++G(d) optimized geometry of **radical cation A<sup>+</sup>-T** base pair.  
**TE = -999.616674723 A.U.**

Charge = 1 Multiplicity = 2

|   |           |           |           |
|---|-----------|-----------|-----------|
| 1 | -1.040934 | -0.358819 | 0.000564  |
| 7 | 0.968214  | -0.332481 | 0.000306  |
| 7 | 0.999322  | 1.976945  | 0.000446  |
| 6 | 1.659909  | 0.848177  | 0.000271  |
| 6 | 1.626006  | -1.466621 | 0.000171  |
| 7 | 2.988884  | -1.657846 | -0.000010 |
| 6 | 3.648658  | -0.536642 | -0.000059 |
| 6 | 3.094415  | 0.778786  | 0.000060  |
| 7 | 4.045281  | 1.715343  | -0.000031 |
| 6 | 5.185083  | 1.007316  | -0.000211 |
| 7 | 5.015980  | -0.330902 | -0.000230 |
| 8 | -1.696448 | 2.026790  | 0.000270  |
| 6 | -2.506975 | 1.084119  | 0.000116  |
| 7 | -2.052593 | -0.212735 | 0.000315  |
| 6 | -2.810525 | -1.371374 | 0.000111  |
| 7 | -4.173796 | -1.156725 | -0.000082 |
| 6 | -4.692610 | 0.116648  | -0.000316 |
| 6 | -3.946376 | 1.246212  | -0.000247 |
| 8 | -2.298783 | -2.476944 | 0.000388  |
| 6 | -4.523453 | 2.631141  | -0.000471 |
| 1 | -0.060202 | 1.987002  | 0.000698  |
| 1 | 1.512665  | 2.854104  | 0.000437  |
| 1 | 1.027476  | -2.375117 | 0.000198  |
| 1 | 6.170779  | 1.459481  | -0.000323 |
| 1 | -5.778292 | 0.163105  | -0.000543 |
| 1 | -4.195315 | 3.191434  | 0.880949  |
| 1 | -4.194898 | 3.191321  | -0.881807 |
| 1 | -5.616745 | 2.597521  | -0.000727 |
| 6 | 6.036655  | -1.377306 | -0.000375 |
| 1 | 5.922982  | -1.994835 | 0.892364  |
| 1 | 5.922644  | -1.994915 | -0.893015 |
| 1 | 7.019032  | -0.903511 | -0.000583 |
| 6 | -5.027908 | -2.344863 | -0.000294 |
| 1 | -4.827101 | -2.947471 | -0.888635 |
| 1 | -4.826014 | -2.948489 | 0.887097  |
| 1 | -6.070550 | -2.024345 | 0.000539  |

3. wb97x/6-31++G(d) optimized geometry of **proton transferred radical cation A(-H)<sup>·-</sup>(H<sup>+</sup>)T base pair. (TE = -999.610066607 A.U.)**

Charge = 1 Multiplicity = 2

|   |           |           |           |
|---|-----------|-----------|-----------|
| 1 | 0.883244  | -0.226704 | -0.000052 |
| 7 | -0.895348 | -0.357315 | -0.000031 |
| 7 | -0.846501 | 1.948734  | -0.000002 |
| 6 | -1.561919 | 0.855908  | -0.000006 |
| 6 | -1.566860 | -1.483119 | -0.000039 |
| 7 | -2.924903 | -1.647257 | -0.000026 |
| 6 | -3.569086 | -0.507326 | -0.000002 |
| 6 | -2.992716 | 0.793418  | 0.000010  |
| 7 | -3.941133 | 1.750125  | 0.000034  |
| 6 | -5.078535 | 1.064676  | 0.000047  |
| 7 | -4.927012 | -0.286010 | 0.000017  |
| 8 | 1.791216  | 2.160806  | -0.000017 |
| 6 | 2.505791  | 1.086441  | -0.000024 |
| 7 | 1.926799  | -0.126668 | -0.000042 |
| 6 | 2.607382  | -1.343147 | -0.000052 |
| 7 | 3.989101  | -1.223393 | -0.000001 |
| 6 | 4.595322  | -0.004605 | 0.000016  |
| 6 | 3.925375  | 1.182314  | -0.000006 |
| 8 | 2.023560  | -2.404624 | 0.000015  |
| 6 | 4.597150  | 2.525795  | 0.000008  |
| 1 | -1.430877 | 2.787104  | 0.000019  |
| 1 | -0.980430 | -2.399464 | -0.000063 |
| 1 | -6.061358 | 1.522741  | 0.000067  |
| 1 | 5.681731  | -0.030382 | 0.000048  |
| 1 | 4.314068  | 3.107218  | -0.882863 |
| 1 | 4.314030  | 3.107218  | 0.882868  |
| 1 | 5.684318  | 2.410263  | 0.000032  |
| 6 | -5.962718 | -1.312783 | -0.000001 |
| 1 | -5.863585 | -1.934388 | -0.892006 |
| 1 | -5.863454 | -1.934543 | 0.891881  |
| 1 | -6.937577 | -0.823004 | 0.000114  |
| 6 | 4.750797  | -2.477354 | 0.000066  |
| 1 | 4.498542  | -3.059235 | 0.888595  |
| 1 | 4.498414  | -3.059395 | -0.888319 |
| 1 | 5.814790  | -2.238744 | -0.000035 |
| 1 | 0.763018  | 2.033047  | -0.000012 |

4. wb97x/6-31++G(d) optimized geometry of  $A^{*+}-T^{*+}$  base pair (double oxidation) in triplet state, see **Figure 3** in the text. (TE = **-999.222672458 A.U.**)

Charge = 2 Multiplicity = 3

|   |           |           |           |
|---|-----------|-----------|-----------|
| 1 | 0.986367  | -0.244859 | 0.000036  |
| 7 | -0.957385 | -0.193478 | -0.000012 |
| 7 | -1.132543 | 2.123581  | -0.000002 |
| 6 | -1.709789 | 0.944288  | -0.000013 |
| 6 | -1.572345 | -1.365674 | -0.000024 |
| 7 | -2.912747 | -1.625841 | -0.000039 |
| 6 | -3.632494 | -0.542534 | -0.000037 |
| 6 | -3.139996 | 0.800303  | -0.000022 |
| 7 | -4.125009 | 1.687273  | -0.000012 |
| 6 | -5.240952 | 0.921640  | -0.000031 |
| 7 | -5.008969 | -0.402107 | -0.000038 |
| 8 | 1.825692  | 2.099142  | -0.000050 |
| 6 | 2.540428  | 1.113310  | -0.000023 |
| 7 | 2.020377  | -0.162278 | 0.000022  |
| 6 | 2.723137  | -1.339531 | 0.000074  |
| 7 | 4.170237  | -1.190562 | 0.000074  |
| 6 | 4.752469  | -0.005631 | 0.000023  |
| 6 | 4.023204  | 1.202091  | -0.000032 |
| 8 | 2.234709  | -2.432983 | 0.000137  |
| 6 | 4.668427  | 2.528119  | -0.000095 |
| 1 | -0.110495 | 2.210020  | 0.000007  |
| 1 | -1.699842 | 2.967037  | -0.000001 |
| 1 | -0.932729 | -2.245890 | -0.000022 |
| 1 | -6.244981 | 1.333131  | -0.000026 |
| 1 | 5.840630  | 0.009028  | 0.000026  |
| 1 | 4.334993  | 3.106256  | -0.873349 |
| 1 | 4.334929  | 3.106374  | 0.873055  |
| 1 | 5.758022  | 2.463731  | -0.000054 |
| 6 | -5.984501 | -1.498356 | -0.000067 |
| 1 | -5.840522 | -2.106637 | -0.894462 |
| 1 | -5.840266 | -2.106901 | 0.894106  |
| 1 | -6.986446 | -1.068131 | 0.000143  |
| 6 | 4.938138  | -2.449693 | 0.000148  |
| 1 | 4.672010  | -3.024040 | 0.889783  |
| 1 | 4.671886  | -3.024222 | -0.889330 |
| 1 | 6.001146  | -2.210273 | 0.000050  |

5. wb97x/6-31G(d) optimized geometry of (5'-A-3')•(3'-T-5') base pair.

TE = -4033.68803586 A.U.

Charge = 0 Multiplicity = 1

|    |            |           |           |
|----|------------|-----------|-----------|
| 8  | 10.427552  | -2.582873 | -1.189927 |
| 15 | 9.506407   | -1.796862 | -0.140187 |
| 8  | 8.803327   | -2.946355 | 0.725053  |
| 8  | 10.188798  | -0.750686 | 0.646179  |
| 8  | 8.294127   | -1.334609 | -1.064309 |
| 6  | 8.468582   | -0.203255 | -1.937928 |
| 6  | 7.503850   | 0.902540  | -1.549263 |
| 8  | 6.172899   | 0.458752  | -1.766392 |
| 6  | 5.416575   | 0.496179  | -0.566490 |
| 6  | 7.599266   | 1.328686  | -0.076357 |
| 6  | 6.439477   | 0.584788  | 0.567368  |
| 8  | 7.401843   | 2.755169  | -0.061474 |
| 1  | 8.248819   | -0.548698 | -2.950411 |
| 1  | 9.499464   | 0.165642  | -1.895556 |
| 1  | 7.705174   | 1.771142  | -2.188626 |
| 1  | 4.734593   | 1.353689  | -0.570718 |
| 1  | 8.566492   | 1.092602  | 0.376336  |
| 1  | 6.768714   | -0.421964 | 0.842511  |
| 1  | 6.041028   | 1.081572  | 1.454105  |
| 7  | 4.579262   | -0.676442 | -0.504247 |
| 6  | 4.970613   | -1.998722 | -0.581281 |
| 7  | 3.979186   | -2.842144 | -0.515866 |
| 6  | 2.863512   | -2.033385 | -0.394729 |
| 6  | 1.488172   | -2.324374 | -0.273331 |
| 7  | 1.004121   | -3.572742 | -0.254781 |
| 7  | 0.640189   | -1.284650 | -0.170947 |
| 6  | 1.122134   | -0.029915 | -0.185025 |
| 7  | 2.382442   | 0.360608  | -0.287920 |
| 6  | 3.209219   | -0.690957 | -0.392541 |
| 1  | 6.015708   | -2.262896 | -0.699118 |
| 1  | 0.001906   | -3.739014 | -0.156608 |
| 1  | 1.645633   | -4.345026 | -0.335128 |
| 1  | 0.363247   | 0.746662  | -0.097692 |
| 15 | 7.553024   | 3.653520  | 1.247215  |
| 8  | 8.543767   | 2.823730  | 2.214090  |
| 8  | 7.957943   | 5.042533  | 0.999288  |
| 8  | 6.127870   | 3.436756  | 1.956245  |
| 8  | -10.472094 | -1.683761 | 1.022575  |
| 15 | -9.088443  | -1.653288 | 0.193373  |
| 8  | -8.636241  | -3.174547 | -0.005024 |
| 8  | -9.148898  | -0.887656 | -1.059934 |
| 8  | -8.053643  | -1.201047 | 1.321119  |
| 6  | -8.170192  | 0.057362  | 2.007593  |
| 6  | -7.134790  | 1.059110  | 1.523621  |
| 8  | -5.843610  | 0.493901  | 1.686761  |
| 6  | -5.098242  | 0.584137  | 0.478815  |
| 6  | -7.254641  | 1.497853  | 0.052455  |
| 6  | -6.139007  | 0.727502  | -0.630897 |
| 8  | -6.994440  | 2.917285  | 0.046623  |
| 1  | -7.987318  | -0.165678 | 3.060987  |

|    |            |           |           |
|----|------------|-----------|-----------|
| 1  | -9.183227  | 0.461952  | 1.904157  |
| 1  | -7.229957  | 1.953397  | 2.153814  |
| 1  | -4.415393  | 1.436043  | 0.513767  |
| 1  | -8.237897  | 1.304877  | -0.383483 |
| 1  | -6.525174  | -0.250067 | -0.937643 |
| 1  | -5.753840  | 1.239282  | -1.514597 |
| 7  | -4.258859  | -0.593369 | 0.363382  |
| 6  | -2.883434  | -0.423953 | 0.214373  |
| 8  | -2.349329  | 0.669902  | 0.155634  |
| 7  | -2.176755  | -1.600116 | 0.123059  |
| 6  | -2.673880  | -2.887687 | 0.162346  |
| 8  | -1.927122  | -3.858611 | 0.062824  |
| 6  | -4.122399  | -2.992153 | 0.331393  |
| 6  | -4.737182  | -4.357433 | 0.393008  |
| 6  | -4.826137  | -1.851117 | 0.432828  |
| 1  | -1.147367  | -1.488135 | 0.008751  |
| 1  | -4.457685  | -4.945440 | -0.486890 |
| 1  | -5.829198  | -4.287724 | 0.430445  |
| 1  | -4.385478  | -4.909965 | 1.270907  |
| 1  | -5.899846  | -1.853538 | 0.594745  |
| 15 | -7.389206  | 3.879046  | -1.159639 |
| 8  | -8.867922  | 3.348866  | -1.492823 |
| 8  | -7.189351  | 5.301074  | -0.861396 |
| 8  | -6.575847  | 3.376161  | -2.464951 |
| 1  | 5.916532   | 4.174784  | 2.545481  |
| 1  | 9.427075   | 3.219183  | 2.207173  |
| 1  | 8.742777   | -2.678955 | 1.653196  |
| 1  | 11.332235  | -2.678467 | -0.859431 |
| 1  | -8.591377  | -3.661339 | 0.830631  |
| 1  | -11.221304 | -1.504396 | 0.435901  |
| 1  | -5.857678  | 3.997417  | -2.655186 |
| 1  | -9.186497  | 3.665712  | -2.349052 |

6. wb97x/6-31G(d) optimized geometry of (5'-A<sup>+</sup>-3')•(3'-T-5') base pair.

TE = -4033.42640196 A.U.

Charge = 1 Multiplicity = 2

|    |          |           |           |
|----|----------|-----------|-----------|
| 8  | 9.696112 | -3.568315 | -0.197881 |
| 15 | 9.017021 | -2.180080 | 0.224930  |
| 8  | 7.762262 | -2.673083 | 1.094600  |
| 8  | 9.950812 | -1.188742 | 0.784137  |
| 8  | 8.162004 | -1.664305 | -1.028579 |
| 6  | 8.632231 | -0.564734 | -1.830034 |
| 6  | 7.820506 | 0.690146  | -1.559217 |
| 8  | 6.437826 | 0.420504  | -1.824596 |
| 6  | 5.661919 | 0.607685  | -0.673206 |
| 6  | 7.877513 | 1.238475  | -0.125777 |
| 6  | 6.621237 | 0.662170  | 0.515415  |
| 8  | 7.745427 | 2.661785  | -0.240478 |

|    |            |           |           |
|----|------------|-----------|-----------|
| 1  | 8.496516   | -0.869104 | -2.869966 |
| 1  | 9.692512   | -0.371774 | -1.640656 |
| 1  | 8.158176   | 1.468038  | -2.252518 |
| 1  | 5.041283   | 1.506695  | -0.757425 |
| 1  | 8.801475   | 0.970192  | 0.397015  |
| 1  | 6.813924   | -0.345379 | 0.897084  |
| 1  | 6.257729   | 1.286915  | 1.332508  |
| 7  | 4.708737   | -0.512497 | -0.595055 |
| 6  | 4.985409   | -1.828753 | -0.729144 |
| 7  | 3.905216   | -2.626597 | -0.667094 |
| 6  | 2.893289   | -1.776169 | -0.496708 |
| 6  | 1.477738   | -1.968151 | -0.357023 |
| 7  | 0.910784   | -3.147542 | -0.374465 |
| 7  | 0.701744   | -0.856235 | -0.201475 |
| 6  | 1.262714   | 0.329219  | -0.182322 |
| 7  | 2.595259   | 0.638033  | -0.296343 |
| 6  | 3.339188   | -0.418196 | -0.449538 |
| 1  | 6.001680   | -2.179876 | -0.877605 |
| 1  | -0.138267  | -3.249482 | -0.265503 |
| 1  | 1.492109   | -3.971042 | -0.494439 |
| 1  | 0.589105   | 1.174732  | -0.058549 |
| 15 | 8.340254   | 3.665486  | 0.858811  |
| 8  | 9.870678   | 3.210791  | 1.066431  |
| 8  | 8.151663   | 5.078392  | 0.525070  |
| 8  | 7.641888   | 3.084039  | 2.184783  |
| 8  | -10.411032 | -2.078899 | 0.679869  |
| 15 | -8.975839  | -1.910757 | -0.028831 |
| 8  | -8.413282  | -3.389936 | -0.265569 |
| 8  | -8.966435  | -1.073101 | -1.236508 |
| 8  | -8.060089  | -1.455163 | 1.201316  |
| 6  | -8.336102  | -0.267809 | 1.964214  |
| 6  | -7.403131  | 0.876321  | 1.602032  |
| 8  | -6.055567  | 0.441432  | 1.763608  |
| 6  | -5.304018  | 0.697823  | 0.593451  |
| 6  | -7.520156  | 1.436633  | 0.173279  |
| 6  | -6.321438  | 0.832755  | -0.537250 |
| 8  | -7.373344  | 2.863084  | 0.297824  |
| 1  | -8.169301  | -0.546587 | 3.006925  |
| 1  | -9.382949  | 0.032382  | 1.846046  |
| 1  | -7.606313  | 1.693352  | 2.305604  |
| 1  | -4.694556  | 1.597005  | 0.712938  |
| 1  | -8.469105  | 1.197928  | -0.313159 |
| 1  | -6.605158  | -0.146665 | -0.935845 |
| 1  | -5.970199  | 1.456051  | -1.361433 |
| 7  | -4.358300  | -0.403080 | 0.410896  |
| 6  | -3.013922  | -0.111230 | 0.260308  |
| 8  | -2.539469  | 1.008894  | 0.252191  |
| 7  | -2.218539  | -1.232830 | 0.101236  |
| 6  | -2.606044  | -2.551073 | 0.072650  |
| 8  | -1.764201  | -3.448536 | -0.084455 |
| 6  | -4.026732  | -2.784805 | 0.239583  |
| 6  | -4.542064  | -4.193173 | 0.223133  |
| 6  | -4.815951  | -1.702889 | 0.410758  |
| 1  | -1.223594  | -1.028096 | -0.009372 |
| 1  | -4.208549  | -4.715353 | -0.678809 |
| 1  | -5.635868  | -4.199362 | 0.238764  |

|    |            |           |           |
|----|------------|-----------|-----------|
| 1  | -4.172332  | -4.761898 | 1.082842  |
| 1  | -5.884325  | -1.801935 | 0.579886  |
| 15 | -7.932982  | 3.892163  | -0.785550 |
| 8  | -9.416322  | 3.312983  | -0.986333 |
| 8  | -7.759826  | 5.298524  | -0.411251 |
| 8  | -7.225453  | 3.507296  | -2.188202 |
| 1  | 7.890448   | 3.582478  | 2.977123  |
| 1  | 10.471819  | 3.862813  | 0.676959  |
| 1  | 8.017944   | -3.276050 | 1.808532  |
| 1  | 10.662463  | -3.497377 | -0.213804 |
| 1  | -8.571353  | -3.974741 | 0.489899  |
| 1  | -11.131289 | -1.910126 | 0.054160  |
| 1  | -6.626851  | 4.222589  | -2.448819 |
| 1  | -9.900631  | 3.770106  | -1.688109 |

7. wb97x/6-31G(d) optimized geometry of proton transferred (5'-A(-H)<sup>-</sup>-3')•(3'-(H<sup>+</sup>)T-5') base pair. TE = -4033.42117433 A.U.

Charge = 1 Multiplicity = 2

|    |          |           |           |
|----|----------|-----------|-----------|
| 8  | 9.665764 | -3.507808 | -0.501423 |
| 15 | 9.002144 | -2.136943 | 0.003445  |
| 8  | 7.875838 | -2.665312 | 1.014425  |
| 8  | 9.975115 | -1.127191 | 0.453934  |
| 8  | 7.996543 | -1.642126 | -1.138219 |
| 6  | 8.341563 | -0.529402 | -1.983279 |
| 6  | 7.518787 | 0.697247  | -1.627902 |
| 8  | 6.129882 | 0.388355  | -1.766176 |
| 6  | 5.455154 | 0.551578  | -0.542603 |
| 6  | 7.697417 | 1.230634  | -0.199038 |
| 6  | 6.524369 | 0.611587  | 0.548110  |
| 8  | 7.515221 | 2.653465  | -0.276809 |
| 1  | 8.109030 | -0.840609 | -3.003942 |
| 1  | 9.408531 | -0.299402 | -1.903513 |
| 1  | 7.772474 | 1.490798  | -2.339874 |
| 1  | 4.827923 | 1.449888  | -0.561324 |
| 1  | 8.675209 | 0.984782  | 0.228054  |
| 1  | 6.778724 | -0.396843 | 0.889127  |
| 1  | 6.225719 | 1.211258  | 1.409303  |
| 7  | 4.525213 | -0.567295 | -0.390201 |
| 6  | 4.810963 | -1.896927 | -0.492502 |
| 7  | 3.751893 | -2.690738 | -0.386555 |
| 6  | 2.723539 | -1.836854 | -0.218222 |
| 6  | 1.317796 | -2.048903 | -0.054628 |
| 7  | 0.719826 | -3.209804 | -0.035695 |
| 7  | 0.540351 | -0.914142 | 0.086935  |
| 6  | 1.090624 | 0.274141  | 0.064617  |
| 7  | 2.413127 | 0.581080  | -0.085045 |

|    |            |           |           |
|----|------------|-----------|-----------|
| 6  | 3.162997   | -0.482684 | -0.221529 |
| 1  | 5.827489   | -2.239355 | -0.654031 |
| 1  | -0.882336  | -3.453779 | 0.110381  |
| 1  | 1.388154   | -3.973532 | -0.150605 |
| 1  | 0.415663   | 1.119563  | 0.179787  |
| 15 | 8.211503   | 3.654258  | 0.759601  |
| 8  | 9.778499   | 3.279191  | 0.738386  |
| 8  | 7.913046   | 5.065357  | 0.504080  |
| 8  | 7.742989   | 3.002241  | 2.151971  |
| 8  | -10.348690 | -1.916595 | -0.019368 |
| 15 | -8.802189  | -1.814576 | -0.443715 |
| 8  | -8.288800  | -3.319004 | -0.627524 |
| 8  | -8.512365  | -0.942026 | -1.590135 |
| 8  | -8.102757  | -1.448954 | 0.950463  |
| 6  | -8.451577  | -0.275193 | 1.704272  |
| 6  | -7.440564  | 0.847421  | 1.531543  |
| 8  | -6.136416  | 0.346611  | 1.834360  |
| 6  | -5.232792  | 0.652564  | 0.800380  |
| 6  | -7.348150  | 1.506598  | 0.143558  |
| 6  | -6.075301  | 0.918877  | -0.444288 |
| 8  | -7.200233  | 2.913354  | 0.392598  |
| 1  | -8.454332  | -0.594509 | 2.748671  |
| 1  | -9.458592  | 0.067299  | 1.442786  |
| 1  | -7.699320  | 1.627350  | 2.257648  |
| 1  | -4.594471  | 1.497630  | 1.070181  |
| 1  | -8.224186  | 1.326252  | -0.484166 |
| 1  | -6.326692  | -0.016025 | -0.956171 |
| 1  | -5.595593  | 1.593178  | -1.156030 |
| 7  | -4.324341  | -0.501008 | 0.647943  |
| 6  | -2.965700  | -0.257111 | 0.511127  |
| 8  | -2.457166  | 0.841489  | 0.500358  |
| 7  | -2.201143  | -1.416008 | 0.374577  |
| 6  | -2.680831  | -2.669960 | 0.332472  |
| 8  | -1.887055  | -3.677229 | 0.189839  |
| 6  | -4.081625  | -2.882653 | 0.447073  |
| 6  | -4.656749  | -4.268585 | 0.386540  |
| 6  | -4.836471  | -1.762703 | 0.613392  |
| 1  | -1.173859  | -1.225824 | 0.275949  |
| 1  | -4.273068  | -4.809576 | -0.483116 |
| 1  | -5.745610  | -4.215942 | 0.301534  |
| 1  | -4.398368  | -4.848959 | 1.278094  |
| 1  | -5.914284  | -1.817839 | 0.744746  |
| 15 | -7.521955  | 4.039726  | -0.694906 |
| 8  | -8.904992  | 3.475964  | -1.280676 |
| 8  | -7.474087  | 5.404346  | -0.164531 |
| 8  | -6.496350  | 3.783774  | -1.918169 |



|   |            |           |           |
|---|------------|-----------|-----------|
| 1 | 8.114767   | 3.466434  | 2.916078  |
| 1 | 10.281228  | 3.967221  | 0.278256  |
| 1 | 8.230447   | -3.265024 | 1.687130  |
| 1 | 10.620413  | -3.404362 | -0.630026 |
| 1 | -8.691463  | -3.932411 | 0.004688  |
| 1 | -10.934973 | -1.675306 | -0.752418 |
| 1 | -5.878096  | 4.526999  | -1.979027 |
| 1 | -9.260143  | 4.027816  | -1.991897 |

8. wb97x/6-31G(d) optimized geometry of (5'-A<sup>+</sup>-3')•(3'-T<sup>+</sup>-5') base pair in triplet state. TE = -4033.08318223 A.U.

Charge = 2 Multiplicity = 3

|    |           |           |           |
|----|-----------|-----------|-----------|
| 8  | 9.251640  | -3.573738 | -1.153360 |
| 15 | 8.616706  | -2.290380 | -0.442162 |
| 8  | 7.454072  | -2.939683 | 0.456526  |
| 8  | 9.589336  | -1.376170 | 0.176315  |
| 8  | 7.627242  | -1.595427 | -1.499620 |
| 6  | 8.034759  | -0.400162 | -2.191971 |
| 6  | 7.315670  | 0.819569  | -1.642638 |
| 8  | 5.894865  | 0.612834  | -1.737293 |
| 6  | 5.305917  | 0.637658  | -0.471858 |
| 6  | 7.584637  | 1.170829  | -0.172791 |
| 6  | 6.424379  | 0.507561  | 0.561055  |
| 8  | 7.440661  | 2.591571  | -0.074595 |
| 1  | 7.759870  | -0.548512 | -3.238250 |
| 1  | 9.116900  | -0.256111 | -2.118149 |
| 1  | 7.574863  | 1.679171  | -2.269156 |
| 1  | 4.698922  | 1.539171  | -0.332266 |
| 1  | 8.568429  | 0.838768  | 0.174257  |
| 1  | 6.643219  | -0.545648 | 0.761685  |
| 1  | 6.203739  | 1.010811  | 1.503555  |
| 7  | 4.337599  | -0.484779 | -0.421296 |
| 6  | 4.563464  | -1.762331 | -0.784830 |
| 7  | 3.468288  | -2.557692 | -0.710734 |
| 6  | 2.513423  | -1.737560 | -0.297242 |
| 6  | 1.116567  | -1.940268 | -0.030916 |
| 7  | 0.545945  | -3.114439 | -0.172132 |
| 7  | 0.385721  | -0.865795 | 0.373348  |
| 6  | 0.988504  | 0.304937  | 0.505306  |
| 7  | 2.296069  | 0.619336  | 0.290672  |
| 6  | 2.999071  | -0.404319 | -0.101442 |
| 1  | 5.544827  | -2.095946 | -1.112066 |
| 1  | -0.455841 | -3.237225 | 0.022944  |
| 1  | 1.099112  | -3.908399 | -0.478505 |

|    |           |           |           |
|----|-----------|-----------|-----------|
| 1  | 0.358295  | 1.130600  | 0.829326  |
| 15 | 8.224669  | 3.452899  | 1.032643  |
| 8  | 9.775408  | 3.069761  | 0.852999  |
| 8  | 7.915166  | 4.881645  | 0.972274  |
| 8  | 7.835697  | 2.620829  | 2.352774  |
| 8  | -8.734801 | -0.713105 | -1.441242 |
| 15 | -7.805912 | -1.582094 | -0.501654 |
| 8  | -8.297929 | -3.081579 | -0.627741 |
| 8  | -6.338166 | -1.468820 | -0.706579 |
| 8  | -8.240085 | -1.182304 | 0.997713  |
| 6  | -8.717240 | 0.114785  | 1.381295  |
| 6  | -7.619851 | 1.149785  | 1.552511  |
| 8  | -6.614274 | 0.671672  | 2.470255  |
| 6  | -5.352911 | 1.095585  | 2.083867  |
| 6  | -6.831287 | 1.589651  | 0.316753  |
| 6  | -5.533337 | 2.093820  | 0.941233  |
| 8  | -7.600480 | 2.571127  | -0.358874 |
| 1  | -9.224388 | -0.039926 | 2.335134  |
| 1  | -9.442777 | 0.485697  | 0.649635  |
| 1  | -8.089209 | 2.045005  | 1.981846  |
| 1  | -4.793253 | 1.482748  | 2.937686  |
| 1  | -6.609361 | 0.754045  | -0.352336 |
| 1  | -4.690956 | 2.144806  | 0.251702  |
| 1  | -5.690737 | 3.087921  | 1.372858  |
| 7  | -4.566774 | -0.135835 | 1.631788  |
| 6  | -3.175964 | 0.073576  | 1.341698  |
| 8  | -2.679041 | 1.162169  | 1.464639  |
| 7  | -2.493498 | -1.046886 | 0.943261  |
| 6  | -2.995403 | -2.324981 | 0.817175  |
| 8  | -2.294168 | -3.258233 | 0.460903  |
| 6  | -4.422006 | -2.480678 | 1.155874  |
| 6  | -5.073574 | -3.794547 | 1.004358  |
| 6  | -5.132847 | -1.320412 | 1.560803  |
| 1  | -1.486448 | -0.917315 | 0.742425  |
| 1  | -4.396077 | -4.602253 | 1.294409  |
| 1  | -5.313488 | -3.935829 | -0.060594 |
| 1  | -6.010522 | -3.854153 | 1.562808  |
| 1  | -6.170347 | -1.375257 | 1.877442  |
| 15 | -7.358281 | 2.959901  | -1.893663 |
| 8  | -7.489568 | 1.480875  | -2.571915 |
| 8  | -8.228965 | 4.011385  | -2.406369 |
| 8  | -5.777562 | 3.225131  | -2.009653 |
| 1  | 8.303597  | 2.938170  | 3.139609  |
| 1  | 10.272754 | 3.812472  | 0.478589  |
| 1  | 7.783193  | -3.646462 | 1.032468  |
| 1  | 10.214500 | -3.499179 | -1.240565 |

|   |           |           |           |
|---|-----------|-----------|-----------|
| 1 | -9.257977 | -3.212611 | -0.589214 |
| 1 | -8.292868 | 0.016783  | -1.932118 |
| 1 | -5.603880 | 4.145881  | -2.262486 |
| 1 | -7.449466 | 1.526026  | -3.541184 |

9. wb97x/6-31++G(d) optimized geometry of **neutral** G-C base pair.  
**TE = -1015.94611414 A.U.**

**Charge = 0 Multiplicity = 1**

|   |           |           |           |
|---|-----------|-----------|-----------|
| 1 | 0.314042  | 0.037650  | -0.000082 |
| 7 | 2.225592  | 0.328775  | -0.000036 |
| 7 | -4.642805 | -0.325284 | 0.000072  |
| 6 | -4.950418 | 1.021060  | -0.000102 |
| 7 | -3.903791 | 1.794768  | 0.000173  |
| 6 | -2.836812 | 0.917512  | 0.000003  |
| 6 | -1.425045 | 1.147820  | -0.000046 |
| 8 | -0.812859 | 2.220299  | -0.000018 |
| 7 | -0.711976 | -0.058700 | -0.000078 |
| 6 | -1.260378 | -1.316951 | -0.000081 |
| 7 | -0.391365 | -2.347227 | -0.000099 |
| 7 | -2.558797 | -1.544194 | -0.000047 |
| 6 | -3.279724 | -0.398971 | -0.000010 |
| 7 | 4.378908  | -0.674249 | 0.000042  |
| 6 | 2.979169  | -0.798882 | -0.000004 |
| 8 | 2.496346  | -1.935663 | -0.000011 |
| 6 | 2.790770  | 1.533977  | -0.000022 |
| 7 | 1.989393  | 2.601286  | -0.000043 |
| 6 | 4.222119  | 1.689610  | 0.000020  |
| 6 | 4.958983  | 0.555577  | 0.000051  |
| 1 | -5.981230 | 1.357167  | -0.000121 |
| 1 | 2.375769  | 3.531822  | -0.000023 |
| 1 | 4.691175  | 2.666640  | 0.000029  |
| 1 | 6.045267  | 0.568411  | 0.000087  |
| 1 | 0.622842  | -2.219980 | -0.000081 |
| 1 | -0.781217 | -3.275877 | -0.000076 |
| 1 | 0.964268  | 2.484363  | -0.000048 |
| 6 | -5.552697 | -1.451027 | 0.000108  |
| 1 | -5.393867 | -2.066576 | -0.889509 |
| 1 | -5.393260 | -2.067003 | 0.889319  |
| 1 | -6.577329 | -1.071748 | 0.000546  |
| 6 | 5.164823  | -1.902151 | 0.000085  |
| 1 | 4.929720  | -2.496601 | 0.885908  |
| 1 | 4.929747  | -2.496643 | -0.885716 |
| 1 | 6.225325  | -1.640379 | 0.000096  |

10. wb97x/6-31++G(d) optimized geometry of radical cation G<sup>+</sup>-C base pair.  
TE = -1015.69568698 A.U.

Charge = 1 Multiplicity = 2

|   |           |           |           |
|---|-----------|-----------|-----------|
| 1 | -0.399834 | 0.112341  | 0.000075  |
| 7 | -2.199477 | 0.387874  | 0.000045  |
| 7 | 4.629485  | -0.341856 | -0.000060 |
| 6 | 4.920013  | 0.984487  | -0.000098 |
| 7 | 3.847839  | 1.782587  | -0.000077 |
| 6 | 2.816580  | 0.939920  | -0.000010 |
| 6 | 1.373991  | 1.188948  | 0.000037  |
| 8 | 0.825289  | 2.271426  | 0.000058  |
| 7 | 0.644515  | -0.005152 | 0.000058  |
| 6 | 1.181501  | -1.258408 | 0.000048  |
| 7 | 0.372601  | -2.289701 | 0.000060  |
| 7 | 2.529366  | -1.507669 | 0.000033  |
| 6 | 3.257195  | -0.423194 | -0.000001 |
| 7 | -4.277189 | -0.758507 | -0.000066 |
| 6 | -2.886153 | -0.782797 | -0.000018 |
| 8 | -2.318353 | -1.887934 | -0.000028 |
| 6 | -2.849201 | 1.555630  | 0.000064  |
| 7 | -2.125463 | 2.678861  | 0.000117  |
| 6 | -4.280634 | 1.611465  | 0.000026  |
| 6 | -4.939781 | 0.429571  | -0.000040 |
| 1 | 5.942627  | 1.344761  | -0.000153 |
| 1 | -2.572683 | 3.582599  | 0.000126  |
| 1 | -4.815089 | 2.553964  | 0.000046  |
| 1 | -6.023791 | 0.368909  | -0.000078 |
| 1 | -0.666638 | -2.177266 | 0.000051  |
| 1 | 0.788877  | -3.212363 | 0.000058  |
| 1 | -1.108242 | 2.639020  | 0.000119  |
| 6 | 5.553559  | -1.471305 | 0.000005  |
| 1 | 5.391280  | -2.077371 | 0.893417  |
| 1 | 5.390173  | -2.078320 | -0.892557 |
| 1 | 6.573368  | -1.084017 | -0.000844 |
| 6 | -4.984365 | -2.039729 | -0.000144 |
| 1 | -4.712759 | -2.614080 | -0.887934 |
| 1 | -4.712811 | -2.614160 | 0.887610  |
| 1 | -6.057931 | -1.844544 | -0.000168 |

11. wb97x/6-31++G(d) optimized geometry of proton transferred **radical cation** G(-H)<sup>•-</sup>-(H<sup>+</sup>)C base pair. **TE = -1015.69399298 A.U.**

**Charge = 1 Multiplicity = 2**

|   |           |           |           |
|---|-----------|-----------|-----------|
| 7 | -2.220612 | 0.338954  | 0.001514  |
| 7 | 4.651551  | -0.279519 | -0.004380 |
| 6 | 4.874049  | 1.060509  | -0.008380 |
| 7 | 3.766078  | 1.804113  | -0.008400 |
| 6 | 2.772759  | 0.909252  | -0.003143 |
| 6 | 1.314098  | 1.063564  | -0.000852 |
| 8 | 0.764028  | 2.168091  | -0.001064 |
| 7 | 0.600650  | -0.107061 | 0.001862  |
| 6 | 1.224023  | -1.292132 | 0.003309  |
| 7 | 0.485849  | -2.397511 | 0.004565  |
| 7 | 2.592698  | -1.530699 | 0.003737  |
| 6 | 3.281484  | -0.425924 | -0.000042 |
| 7 | -4.328449 | -0.692371 | -0.002785 |
| 6 | -2.950217 | -0.835977 | -0.001738 |
| 8 | -2.414208 | -1.930898 | -0.003624 |
| 6 | -2.755748 | 1.584893  | 0.004308  |
| 7 | -1.946888 | 2.621779  | 0.006767  |
| 6 | -4.179803 | 1.689611  | 0.004278  |
| 6 | -4.901557 | 0.542732  | 0.000487  |
| 1 | 5.878095  | 1.469685  | -0.012482 |
| 1 | -2.329792 | 3.556966  | 0.008821  |
| 1 | -4.664460 | 2.657876  | 0.006789  |
| 1 | -5.987193 | 0.555134  | -0.000213 |
| 1 | -0.532391 | -2.345504 | 0.002568  |
| 1 | 0.951817  | -3.293429 | 0.005562  |
| 1 | -0.913706 | 2.503395  | 0.004767  |
| 6 | 5.627984  | -1.359920 | 0.008491  |
| 1 | 5.560165  | -1.911158 | 0.948975  |
| 1 | 5.434603  | -2.036683 | -0.826206 |
| 1 | 6.625297  | -0.929216 | -0.093794 |
| 6 | -5.122717 | -1.926340 | -0.007352 |
| 1 | -4.889302 | -2.511170 | -0.898926 |
| 1 | -4.888711 | -2.518110 | 0.879446  |
| 1 | -6.179573 | -1.657499 | -0.005982 |
| 1 | -1.175690 | 0.196778  | 0.001825  |

12. wb97x/6-31++G(d) optimized geometry of **G(-H)<sup>+</sup>-(H<sup>+</sup>)C** base pair (double oxidation) in singlet state, see **Figure 3** in the text. (TE = -1015.29846906 A.U.)

Charge = 2 Multiplicity = 1

|   |           |           |           |
|---|-----------|-----------|-----------|
| 7 | -2.296279 | 0.403648  | 0.001440  |
| 7 | 4.733271  | -0.265298 | -0.001884 |
| 6 | 4.932409  | 1.026401  | -0.005505 |
| 7 | 3.766840  | 1.811901  | -0.005142 |
| 6 | 2.805816  | 0.958083  | -0.001110 |
| 6 | 1.309178  | 1.105766  | 0.000950  |
| 8 | 0.775372  | 2.197424  | 0.001237  |
| 7 | 0.623516  | -0.077103 | 0.002560  |
| 6 | 1.222958  | -1.253180 | 0.002739  |
| 7 | 0.531212  | -2.365655 | 0.003066  |
| 7 | 2.652400  | -1.494433 | 0.002310  |
| 6 | 3.318232  | -0.427001 | 0.000886  |
| 7 | -4.308935 | -0.788876 | -0.002092 |
| 6 | -2.931480 | -0.828177 | -0.000373 |
| 8 | -2.294939 | -1.871150 | -0.000450 |
| 6 | -2.917901 | 1.609599  | 0.001834  |
| 7 | -2.178549 | 2.704107  | 0.003412  |
| 6 | -4.338382 | 1.605079  | 0.000456  |
| 6 | -4.970261 | 0.401900  | -0.001552 |
| 1 | 5.922631  | 1.475568  | -0.008728 |
| 1 | -2.618137 | 3.615374  | 0.003789  |
| 1 | -4.899820 | 2.531312  | 0.000799  |
| 1 | -6.054027 | 0.334112  | -0.002896 |
| 1 | -0.498784 | -2.317210 | 0.002498  |
| 1 | 1.000971  | -3.264002 | 0.003408  |
| 1 | -1.157546 | 2.666294  | 0.003660  |
| 6 | 5.718074  | -1.359618 | 0.001616  |
| 1 | 5.587451  | -1.944805 | 0.913650  |
| 1 | 5.549859  | -1.983359 | -0.878000 |
| 1 | 6.717353  | -0.924406 | -0.029153 |
| 6 | -5.017523 | -2.080391 | -0.004582 |
| 1 | -4.743242 | -2.646005 | -0.896554 |
| 1 | -4.744526 | -2.648728 | 0.886042  |
| 1 | -6.089823 | -1.884756 | -0.005073 |
| 1 | -1.266871 | 0.331619  | 0.002413  |

13. wb97x/6-31G(d) optimized geometry of (5'-G-3')•(3'-C-5') base pair.

TE = -4049.73526111 A.U.

Charge = 0 Multiplicity = 1

|    |            |           |           |
|----|------------|-----------|-----------|
| 8  | -7.624823  | -3.363943 | 1.098969  |
| 15 | -8.819520  | -2.454196 | 0.539380  |
| 8  | -8.876895  | -2.844094 | -1.013463 |
| 8  | -10.100657 | -2.522683 | 1.260286  |
| 8  | -8.095874  | -1.029484 | 0.492333  |
| 6  | -8.069619  | -0.244688 | 1.696248  |
| 6  | -7.018957  | 0.838499  | 1.541967  |
| 8  | -5.726008  | 0.263054  | 1.647535  |
| 6  | -4.954097  | 0.524861  | 0.484671  |
| 6  | -7.072861  | 1.562993  | 0.189299  |
| 6  | -5.967553  | 0.884750  | -0.603386 |
| 8  | -6.749176  | 2.948124  | 0.443412  |
| 1  | -7.805267  | -0.874479 | 2.552162  |
| 1  | -9.061600  | 0.190458  | 1.856411  |
| 1  | -7.157032  | 1.567756  | 2.350083  |
| 1  | -4.248594  | 1.343412  | 0.666412  |
| 1  | -8.056966  | 1.508110  | -0.284770 |
| 1  | -6.358337  | -0.029696 | -1.059047 |
| 1  | -5.543058  | 1.527659  | -1.377311 |
| 7  | -4.155757  | -0.637352 | 0.192892  |
| 6  | -4.569793  | -1.959367 | 0.136950  |
| 7  | -3.606835  | -2.784598 | -0.145580 |
| 6  | -2.492302  | -1.977085 | -0.286449 |
| 6  | -1.132848  | -2.297092 | -0.596736 |
| 8  | -0.630881  | -3.400988 | -0.820208 |
| 7  | -0.336059  | -1.144065 | -0.631266 |
| 6  | -0.768263  | 0.137824  | -0.403918 |
| 7  | 0.163618   | 1.106180  | -0.497146 |
| 7  | -2.016515  | 0.446441  | -0.118931 |
| 6  | -2.812767  | -0.645118 | -0.073391 |
| 1  | -5.597169  | -2.232762 | 0.345751  |
| 1  | 0.659443   | -1.297307 | -0.843809 |
| 1  | 1.150879   | 0.913698  | -0.669234 |
| 1  | -0.137829  | 2.044114  | -0.293270 |
| 15 | -7.212645  | 4.049274  | -0.615431 |
| 8  | -8.566804  | 3.889743  | -1.174286 |
| 8  | -6.948310  | 5.411988  | 0.185221  |
| 8  | -6.006705  | 4.031402  | -1.674483 |
| 8  | 7.727710   | -3.471267 | 1.917017  |
| 15 | 6.980116   | -2.084085 | 1.588674  |
| 8  | 5.423458   | -2.421783 | 1.467621  |
| 8  | 7.297969   | -0.982562 | 2.509254  |
| 8  | 7.353102   | -1.877112 | 0.046383  |
| 6  | 8.419935   | -1.016641 | -0.370174 |
| 6  | 7.869394   | 0.285441  | -0.937572 |
| 8  | 6.885015   | 0.012610  | -1.936890 |
| 6  | 5.593427   | 0.367162  | -1.504817 |
| 6  | 7.197228   | 1.216665  | 0.074439  |
| 6  | 5.717261   | 0.903040  | -0.072235 |
| 8  | 7.477539   | 2.558620  | -0.374293 |

|    |           |           |           |
|----|-----------|-----------|-----------|
| 1  | 8.956997  | -1.559380 | -1.152027 |
| 1  | 9.106459  | -0.809314 | 0.457598  |
| 1  | 8.697396  | 0.817302  | -1.418793 |
| 1  | 5.175779  | 1.108117  | -2.191029 |
| 1  | 7.568248  | 1.074644  | 1.093284  |
| 1  | 5.418829  | 0.135756  | 0.647752  |
| 1  | 5.091093  | 1.777352  | 0.098964  |
| 7  | 4.705606  | -0.817382 | -1.567545 |
| 6  | 3.348595  | -0.592676 | -1.263338 |
| 8  | 2.995046  | 0.566474  | -1.034811 |
| 7  | 2.508192  | -1.654172 | -1.231444 |
| 6  | 2.949443  | -2.886885 | -1.476002 |
| 7  | 2.072062  | -3.887361 | -1.419623 |
| 6  | 4.331502  | -3.137140 | -1.795410 |
| 6  | 5.155652  | -2.060299 | -1.857657 |
| 1  | 1.078591  | -3.705039 | -1.200337 |
| 1  | 2.363062  | -4.830486 | -1.618944 |
| 1  | 4.684238  | -4.127874 | -2.058284 |
| 1  | 6.200620  | -2.125296 | -2.129100 |
| 15 | 7.506524  | 3.798566  | 0.625405  |
| 8  | 8.496694  | 3.238635  | 1.758931  |
| 8  | 7.816113  | 5.072069  | -0.032702 |
| 8  | 6.097706  | 3.801013  | 1.419420  |
| 1  | 5.189948  | -2.898130 | 0.651428  |
| 1  | 7.915536  | -3.539415 | 2.864383  |
| 1  | 8.447018  | 3.751790  | 2.577111  |
| 1  | 5.543903  | 4.526610  | 1.096708  |
| 1  | -6.274382 | 4.444346  | -2.507973 |
| 1  | -7.764139 | 5.721320  | 0.603545  |
| 1  | -7.929947 | -4.234643 | 1.390887  |
| 1  | -9.765031 | -2.689832 | -1.365336 |

14. wb97x/6-31G(d) optimized geometry of (5'-G<sup>+</sup>-3')•(3'-C-5') base pair.

TE = -4049.50359926 A.U.

Charge = 1 Multiplicity = 2

|    |            |           |           |
|----|------------|-----------|-----------|
| 8  | -7.936760  | -3.380367 | 0.784074  |
| 15 | -8.937367  | -2.571630 | -0.184596 |
| 8  | -8.444461  | -2.989823 | -1.645848 |
| 8  | -10.372623 | -2.702360 | 0.092284  |
| 8  | -8.296958  | -1.106287 | -0.045905 |
| 6  | -8.697282  | -0.307772 | 1.079149  |
| 6  | -7.695555  | 0.816481  | 1.240824  |
| 8  | -6.439717  | 0.277242  | 1.675704  |
| 6  | -5.431023  | 0.550699  | 0.742573  |
| 6  | -7.397695  | 1.594464  | -0.046193 |



|    |           |           |           |
|----|-----------|-----------|-----------|
| 6  | -6.126716 | 0.932133  | -0.563206 |
| 8  | -7.130352 | 2.950718  | 0.343692  |
| 1  | -8.705821 | -0.913934 | 1.991636  |
| 1  | -9.702016 | 0.088774  | 0.902261  |
| 1  | -8.059279 | 1.504242  | 2.011137  |
| 1  | -4.762227 | 1.341836  | 1.101097  |
| 1  | -8.224093 | 1.572568  | -0.762548 |
| 1  | -6.388092 | 0.031150  | -1.124985 |
| 1  | -5.526402 | 1.599570  | -1.185012 |
| 7  | -4.596695 | -0.652377 | 0.634924  |
| 6  | -4.996119 | -1.951333 | 0.704251  |
| 7  | -3.991306 | -2.829391 | 0.593328  |
| 6  | -2.905669 | -2.072101 | 0.452294  |
| 6  | -1.498435 | -2.437256 | 0.285982  |
| 8  | -1.046229 | -3.562388 | 0.236384  |
| 7  | -0.680958 | -1.306347 | 0.184118  |
| 6  | -1.114988 | -0.014861 | 0.228762  |
| 7  | -0.230040 | 0.946766  | 0.126495  |
| 7  | -2.427036 | 0.344285  | 0.371814  |
| 6  | -3.233924 | -0.677307 | 0.477190  |
| 1  | -6.034420 | -2.229890 | 0.849317  |
| 1  | 0.346247  | -1.497809 | 0.060110  |
| 1  | 0.791445  | 0.754781  | 0.014459  |
| 1  | -0.573767 | 1.897125  | 0.160005  |
| 15 | -7.279789 | 4.102539  | -0.766283 |
| 8  | -8.394147 | 3.928348  | -1.710510 |
| 8  | -7.297841 | 5.429197  | 0.121379  |
| 8  | -5.798651 | 4.113907  | -1.387769 |
| 8  | 10.495057 | -1.844239 | -0.381893 |
| 15 | 9.028626  | -1.805324 | 0.279818  |
| 8  | 8.646222  | -3.318360 | 0.618215  |
| 8  | 8.874763  | -0.884651 | 1.414500  |
| 8  | 8.105912  | -1.551477 | -1.006648 |
| 6  | 8.278251  | -0.385882 | -1.832020 |
| 6  | 7.205322  | 0.659677  | -1.579256 |
| 8  | 5.924621  | 0.067415  | -1.796032 |
| 6  | 5.082128  | 0.289629  | -0.684763 |
| 6  | 7.166038  | 1.285098  | -0.173894 |
| 6  | 6.009802  | 0.562700  | 0.495636  |
| 8  | 6.837608  | 2.673439  | -0.365861 |
| 1  | 8.194030  | -0.741079 | -2.861536 |
| 1  | 9.276115  | 0.043799  | -1.692439 |
| 1  | 7.356504  | 1.464173  | -2.309444 |
| 1  | 4.397449  | 1.118545  | -0.873081 |
| 1  | 8.107018  | 1.187027  | 0.372831  |
| 1  | 6.377763  | -0.371539 | 0.932278  |

|    |           |           |           |
|----|-----------|-----------|-----------|
| 1  | 5.546819  | 1.160544  | 1.282502  |
| 7  | 4.239665  | -0.901411 | -0.518994 |
| 6  | 2.874763  | -0.747702 | -0.283279 |
| 8  | 2.410757  | 0.396336  | -0.171854 |
| 7  | 2.100769  | -1.859332 | -0.177527 |
| 6  | 2.643281  | -3.076372 | -0.269380 |
| 7  | 1.835393  | -4.133258 | -0.158231 |
| 6  | 4.047637  | -3.257133 | -0.482062 |
| 6  | 4.798251  | -2.140921 | -0.608329 |
| 1  | 0.835985  | -4.009271 | -0.010995 |
| 1  | 2.203141  | -5.068866 | -0.220645 |
| 1  | 4.488198  | -4.243932 | -0.552723 |
| 1  | 5.868001  | -2.159122 | -0.796537 |
| 15 | 7.288804  | 3.806818  | 0.663490  |
| 8  | 8.858740  | 3.488373  | 0.758044  |
| 8  | 6.852760  | 5.155386  | 0.289662  |
| 8  | 6.754897  | 3.333502  | 2.114445  |
| 1  | 8.920368  | -3.940357 | -0.071131 |
| 1  | 11.169967 | -1.544944 | 0.245619  |
| 1  | 9.307607  | 4.025222  | 1.426323  |
| 1  | 6.085349  | 3.958810  | 2.427664  |
| 1  | -5.753861 | 4.667857  | -2.181408 |
| 1  | -8.199053 | 5.767283  | 0.228923  |
| 1  | -8.290469 | -4.246159 | 1.037699  |
| 1  | -9.182330 | -2.989718 | -2.273501 |

**15.** wb97x/6-31G(d) optimized geometry of proton transferred (5'-G(-H)<sup>-</sup>-3')•(3'-(H<sup>+</sup>)C-5') base pair. TE = -4049.50198471 A.U.

**Charge = 1 Multiplicity = 2**

|    |            |           |           |
|----|------------|-----------|-----------|
| 8  | -7.757977  | -3.505705 | 0.887940  |
| 15 | -8.943917  | -2.724003 | 0.132656  |
| 8  | -8.710370  | -3.115216 | -1.400000 |
| 8  | -10.302367 | -2.909468 | 0.658640  |
| 8  | -8.347322  | -1.235998 | 0.181262  |
| 6  | -8.630649  | -0.441141 | 1.344681  |
| 6  | -7.674880  | 0.733947  | 1.360767  |
| 8  | -6.354803  | 0.268901  | 1.657152  |
| 6  | -5.467711  | 0.579132  | 0.611974  |
| 6  | -7.573973  | 1.485272  | 0.027631  |
| 6  | -6.329297  | 0.884758  | -0.612939 |
| 8  | -7.352972  | 2.870183  | 0.345699  |
| 1  | -8.484950  | -1.032925 | 2.254622  |
| 1  | -9.669315  | -0.098574 | 1.301476  |

|    |           |           |           |
|----|-----------|-----------|-----------|
| 1  | -7.985448 | 1.426643  | 2.150281  |
| 1  | -4.821920 | 1.423529  | 0.880218  |
| 1  | -8.474435 | 1.389006  | -0.585922 |
| 1  | -6.594872 | -0.044582 | -1.124559 |
| 1  | -5.845157 | 1.569067  | -1.312731 |
| 7  | -4.573015 | -0.562159 | 0.440315  |
| 6  | -4.893942 | -1.885812 | 0.489321  |
| 7  | -3.846964 | -2.700787 | 0.342955  |
| 6  | -2.802732 | -1.877566 | 0.201439  |
| 6  | -1.372435 | -2.138448 | 0.009303  |
| 8  | -0.918724 | -3.282083 | -0.065039 |
| 7  | -0.579243 | -1.021987 | -0.078888 |
| 6  | -1.111956 | 0.203091  | 0.004562  |
| 7  | -0.301961 | 1.253302  | -0.079424 |
| 7  | -2.447264 | 0.541873  | 0.170978  |
| 6  | -3.208649 | -0.509214 | 0.263957  |
| 1  | -5.911336 | -2.224744 | 0.652032  |
| 1  | 1.159894  | -1.383748 | -0.294478 |
| 1  | 0.702811  | 1.132539  | -0.197996 |
| 1  | -0.704744 | 2.175906  | -0.016674 |
| 15 | -7.740914 | 3.971823  | -0.754059 |
| 8  | -8.987149 | 3.721786  | -1.495035 |
| 8  | -7.677971 | 5.325975  | 0.091043  |
| 8  | -6.389522 | 4.032241  | -1.620141 |
| 8  | 10.396188 | -2.152367 | -0.008491 |
| 15 | 8.865190  | -2.026920 | 0.464429  |
| 8  | 8.343817  | -3.517972 | 0.699065  |
| 8  | 8.620863  | -1.123219 | 1.596931  |
| 8  | 8.127697  | -1.677157 | -0.917918 |
| 6  | 8.479261  | -0.513366 | -1.686583 |
| 6  | 7.480618  | 0.618504  | -1.510277 |
| 8  | 6.172297  | 0.135600  | -1.831375 |
| 6  | 5.269554  | 0.423108  | -0.792329 |
| 6  | 7.379185  | 1.254478  | -0.112753 |
| 6  | 6.110909  | 0.644295  | 0.460998  |
| 8  | 7.200455  | 2.662882  | -0.332950 |
| 1  | 8.468651  | -0.839116 | -2.729100 |
| 1  | 9.491575  | -0.176813 | -1.438594 |
| 1  | 7.751941  | 1.405184  | -2.224051 |
| 1  | 4.646518  | 1.286056  | -1.038801 |
| 1  | 8.256555  | 1.072325  | 0.512518  |
| 1  | 6.361153  | -0.307064 | 0.941625  |
| 1  | 5.634277  | 1.296213  | 1.195075  |
| 7  | 4.344451  | -0.723919 | -0.683345 |
| 6  | 2.995045  | -0.470136 | -0.498870 |
| 8  | 2.541228  | 0.656461  | -0.401248 |

|    |           |           |           |
|----|-----------|-----------|-----------|
| 7  | 2.186942  | -1.590875 | -0.424736 |
| 6  | 2.624986  | -2.871297 | -0.496081 |
| 7  | 1.744731  | -3.843544 | -0.403616 |
| 6  | 4.024758  | -3.083161 | -0.668471 |
| 6  | 4.826709  | -1.996474 | -0.759747 |
| 1  | 0.729057  | -3.652880 | -0.276840 |
| 1  | 2.057210  | -4.802233 | -0.452072 |
| 1  | 4.427991  | -4.085599 | -0.730081 |
| 1  | 5.900625  | -2.072599 | -0.909212 |
| 15 | 7.642209  | 3.763459  | 0.739265  |
| 8  | 9.138416  | 3.268437  | 1.039287  |
| 8  | 7.421684  | 5.143709  | 0.301016  |
| 8  | 6.864062  | 3.381491  | 2.103447  |
| 1  | 8.718128  | -4.152842 | 0.071072  |
| 1  | 11.008102 | -1.906622 | 0.701819  |
| 1  | 9.582272  | 3.808229  | 1.708801  |
| 1  | 6.248798  | 4.093633  | 2.332230  |
| 1  | -6.523075 | 4.524995  | -2.443411 |
| 1  | -8.565376 | 5.620269  | 0.343246  |
| 1  | -8.020398 | -4.397193 | 1.161555  |
| 1  | -9.545822 | -3.102472 | -1.889862 |

**16.** wb97x/6-31G(d) optimized geometry of  $(5'\text{-G}(\text{-H})^+\text{-3}')\cdot(3'\text{-(H}^+)\text{C-5}')$  base pair in singlet state. **TE = -4049.14517879 A.U.**

**Charge = 2 Multiplicity = 1**

|    |          |           |           |
|----|----------|-----------|-----------|
| 8  | 6.176725 | -3.357663 | 0.670862  |
| 15 | 5.844330 | -2.401839 | 1.933679  |
| 8  | 4.292463 | -2.002550 | 1.694496  |
| 8  | 6.154663 | -2.950260 | 3.252383  |
| 8  | 6.505347 | -1.045839 | 1.423113  |
| 6  | 7.908816 | -0.942965 | 1.113696  |
| 6  | 8.058532 | 0.062356  | -0.011678 |
| 8  | 7.408487 | -0.421483 | -1.210414 |
| 6  | 6.177103 | 0.184226  | -1.374859 |
| 6  | 7.412633 | 1.423374  | 0.241920  |
| 6  | 5.983835 | 1.240831  | -0.282599 |
| 8  | 8.127831 | 2.360844  | -0.556745 |
| 1  | 8.298484 | -1.914629 | 0.794924  |
| 1  | 8.445165 | -0.610430 | 2.006909  |
| 1  | 9.117690 | 0.179827  | -0.253620 |
| 1  | 6.086180 | 0.574942  | -2.392518 |
| 1  | 7.433176 | 1.727777  | 1.292607  |
| 1  | 5.341079 | 0.875537  | 0.519207  |

|    |           |           |           |
|----|-----------|-----------|-----------|
| 1  | 5.572727  | 2.169289  | -0.683639 |
| 7  | 5.136450  | -0.923244 | -1.293540 |
| 6  | 5.364470  | -2.189216 | -1.525381 |
| 7  | 4.231084  | -3.024109 | -1.445249 |
| 6  | 3.280922  | -2.228881 | -1.116874 |
| 6  | 1.820231  | -2.458350 | -0.866302 |
| 8  | 1.339513  | -3.575091 | -0.893467 |
| 7  | 1.101694  | -1.323707 | -0.608725 |
| 6  | 1.657955  | -0.124473 | -0.587229 |
| 7  | 0.934442  | 0.942126  | -0.348499 |
| 7  | 3.047051  | 0.194221  | -0.803839 |
| 6  | 3.749488  | -0.829506 | -1.015548 |
| 1  | 6.348388  | -2.561253 | -1.784942 |
| 1  | -0.735914 | -1.741891 | -0.357236 |
| 1  | -0.078162 | 0.842417  | -0.184900 |
| 1  | 1.369333  | 1.855980  | -0.335661 |
| 15 | 7.878241  | 3.933403  | -0.267419 |
| 8  | 7.468313  | 4.213882  | 1.116327  |
| 8  | 9.208013  | 4.629238  | -0.793349 |
| 8  | 6.834670  | 4.249700  | -1.443230 |
| 8  | -9.890882 | -1.555004 | -0.409956 |
| 15 | -8.350541 | -1.592884 | -0.851772 |
| 8  | -8.014903 | -3.115888 | -1.195122 |
| 8  | -7.951867 | -0.644085 | -1.901671 |
| 8  | -7.596426 | -1.445859 | 0.560740  |
| 6  | -7.835254 | -0.334863 | 1.443951  |
| 6  | -6.743620 | 0.717641  | 1.357996  |
| 8  | -5.468143 | 0.088764  | 1.574264  |
| 6  | -4.579980 | 0.410299  | 0.544370  |
| 6  | -6.617398 | 1.497937  | 0.033870  |
| 6  | -5.424768 | 0.849128  | -0.647266 |
| 8  | -6.260977 | 2.854555  | 0.322999  |
| 1  | -7.846856 | -0.762123 | 2.448861  |
| 1  | -8.812891 | 0.117704  | 1.247747  |
| 1  | -6.919023 | 1.431885  | 2.168305  |
| 1  | -3.858263 | 1.168170  | 0.858960  |
| 1  | -7.514732 | 1.457399  | -0.590028 |
| 1  | -5.775162 | -0.011237 | -1.226063 |
| 1  | -4.905677 | 1.543779  | -1.309824 |
| 7  | -3.777098 | -0.812887 | 0.262813  |
| 6  | -2.425008 | -0.680545 | 0.040451  |
| 8  | -1.836428 | 0.389411  | 0.045240  |
| 7  | -1.750036 | -1.867484 | -0.201212 |
| 6  | -2.316842 | -3.097847 | -0.253987 |
| 7  | -1.539655 | -4.136720 | -0.505046 |
| 6  | -3.714822 | -3.181180 | -0.031341 |

|    |            |           |           |
|----|------------|-----------|-----------|
| 6  | -4.388080  | -2.029083 | 0.225414  |
| 1  | -0.533663  | -4.034105 | -0.656522 |
| 1  | -1.938317  | -5.063603 | -0.555852 |
| 1  | -4.227505  | -4.133956 | -0.060720 |
| 1  | -5.457971  | -2.010234 | 0.425459  |
| 15 | -7.378656  | 3.996965  | 0.474312  |
| 8  | -8.348908  | 3.295418  | 1.550371  |
| 8  | -6.827333  | 5.318591  | 0.775188  |
| 8  | -8.263015  | 3.899576  | -0.865608 |
| 1  | -8.545412  | -3.746827 | -0.686272 |
| 1  | -10.459833 | -1.176958 | -1.098285 |
| 1  | -9.050774  | 3.890871  | 1.853854  |
| 1  | -8.087663  | 4.650609  | -1.451945 |
| 1  | 6.673466   | 5.199394  | -1.553528 |
| 1  | 9.796930   | 4.895859  | -0.070887 |
| 1  | 6.207811   | -4.296417 | 0.918312  |
| 1  | 3.802795   | -2.113150 | 2.525370  |
